# Supplementary material
Source: PubMed Central journal article supplement (PMC6627732)
Supplement: ml9b00079_si_001.pdf [file ml9b00079_si_001.pdf]

## Supporting Information for:

### DL5050, A Selective Agonist for the Human Constitutive Androstane Receptor

Dongdong Liang,<sup>1,†</sup> Linhao Li,<sup>1,†</sup> Caitlin Lynch,<sup>2</sup> Benjamin Diethelm-Varela,<sup>1</sup>  
Menghang Xia,<sup>2</sup> Fengtian Xue,<sup>\*.1</sup> Hongbing Wang,<sup>\*.1</sup>

<sup>1</sup>Department of Pharmaceutical Sciences, University of Maryland School of  
Pharmacy, Baltimore, Maryland 21201, United States

<sup>2</sup>9800 Medical Center Drive, National Center for Advancing Translational Sciences,  
National Institutes of Health, Bethesda, Maryland 20892-3375, United states

#### Contents:

|                                                                                         |    |
|-----------------------------------------------------------------------------------------|----|
| 1. General Procedures.....                                                              | 1  |
| 2. General Procedure for the Synthesis of Compounds <b>1-17</b> .....                   | 1  |
| 3. General Procedure for the Synthesis of Compounds <b>18-29</b> .....                  | 16 |
| 4. CAR Agonist Luciferase Reporter Gene Assay.....                                      | 23 |
| 5. Cell Viability Assay <sup>4</sup> .....                                              | 24 |
| 6. Experimental protocol for hPXR agonist HTS.....                                      | 25 |
| 7. Culture and Treatment of HPH.....                                                    | 25 |
| 8. Real-Time PCR Analysis.....                                                          | 26 |
| 9. Western Blot Analysis.....                                                           | 26 |
| 10. Table S1 Original Data of Activity and Cytotoxicity for Cpd <b>1-29</b> .....       | 27 |
| 11. <sup>1</sup> H, <sup>13</sup> C NMR and HPLC Spectra of Compounds <b>1-29</b> ..... | 30 |
| 12. References.....                                                                     | 88 |

## 1. General Procedures.

All reagents and solvents were of analytical grade and used without further purification. Reactions were monitored using thin-layer chromatography (TLC) on commercial silica-gel plates (GF254). UV spectra were obtained on a Nanodrop 2000c spectrophotometer. Flash column chromatography was performed on silica gel (200–300 mesh). NMR spectra were obtained on a Varian INOVA 400 MHz NMR spectrometer at 25 °C. Chemical shifts are reported as  $\delta$  values (parts per million) using the residual solvent peak as an internal reference. Chemical shifts ( $\delta$ ) were reported in ppm referenced to the CDCl<sub>3</sub> residual peak ( $\delta$  7.264) for <sup>1</sup>H NMR. Chemical shifts of <sup>13</sup>C NMR were reported relative to CDCl<sub>3</sub> ( $\delta$  77.04). Data for <sup>1</sup>H NMR were reported in the following order: chemical shift, multiplicity (s, singlet; d, doublet; t, triplet; sept, septuplet; dd, double doublet; dt, double triplet; m, multiplet), coupling constant (Hz), number of protons. Data for <sup>13</sup>C NMR were reported as  $\delta$  values (parts per million). High-resolution mass spectra (HRMS) were obtained on a JEOL AccuTOF with ESI/APCI ion sources coupled to an Agilent 1100 HPLC system. HPLC analysis was performed on a Shimadzu HPLC fitted with a C-18 reversed-phase column (Phenomenex, luna 5  $\mu$ M C18(2) 4.6 mm  $\times$  100 mm) with a flow rate of 0.8 mL/min using CH<sub>3</sub>CN–H<sub>2</sub>O 8:2 mobile phase. The purity of final products is > 95%.

## 2. General Procedure for the Synthesis of Compounds 1-17

A solution of 2-aminothiazole (5 mmol, 1 equiv) and bromomethyl ketone **30** (5 mmol, 1 equiv) in EtOH (30 mL) was heated under reflux for 16 h. The solvent was removed under reduced pressure, and saturated NaHCO<sub>3</sub> (30 mL) was added to the remaining solid. The mixture was then extracted with EtOAc (30 mL  $\times$  3), and the organic layers were combined, dried over Na<sub>2</sub>SO<sub>4</sub>. The concentrated crude product

dried overnight under vacuum to get the crude imidazothiazole **31** that was used directly in the next step.<sup>1</sup>

The Vilsmeier reagent was prepared by dropping of POCl<sub>3</sub> (16.5 mmol, 3.3 equiv) into a solution of DMF (5 mmol, 1.0 equiv) in CHCl<sub>3</sub> (5 mL) at 0 °C. To the resulting mixture at 0-5 °C was added a solution of imidazothiazole **31** (5 mmol) in CHCl<sub>3</sub> (30 mL) dropwise. The reaction was warmed to the room temperature over 1 h, and then heated under reflux for an additional 5 h. The solvent was removed under reduced pressure and the resulting residue was poured onto ice. The crude aldehyde **32** was collected by filtration and further purified using flash chromatography.<sup>2</sup>

*6-(4-Chlorophenyl)imidazo[2,1-b]thiazole-5-carbaldehyde (32a)*

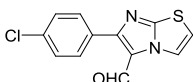

<sup>1</sup>H NMR (400 MHz, CDCl<sub>3</sub>): δ 9.89 (s, 1H), 8.39 (d, *J* = 4.8 Hz, 1H), 7.74 (d, *J* = 8.8 Hz, 2H), 7.49 (d, *J* = 8.4 Hz, 2H), 7.08 (d, *J* = 4.0 Hz, 1H); <sup>13</sup>C NMR (100 MHz, CDCl<sub>3</sub>): δ 177.7, 156.8, 155.7, 136.0, 130.9, 130.2, 129.2, 124.0, 121.5, 114.9.

*6-Phenylimidazo[2,1-b]thiazole-5-carbaldehyde (32b)*

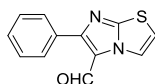

<sup>1</sup>H NMR (400 MHz, CDCl<sub>3</sub>): δ 9.90 (s, 1H), 8.39 (d, *J* = 4.0 Hz, 1H), 7.79 (d, *J* = 6.8 Hz, 2H), 7.50 (d, *J* = 7.2 Hz, 3H), 7.05 (d, *J* = 4.0 Hz, 1H); <sup>13</sup>C NMR (100 MHz, CDCl<sub>3</sub>): δ 178.1, 158.2, 155.6, 132.5, 129.7, 129.1, 128.9, 124.0, 121.5, 114.6.

*6-(4-Fluorophenyl)imidazo[2,1-b]thiazole-5-carbaldehyde (32c)*

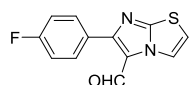

$^1\text{H}$  NMR (400 MHz,  $\text{CDCl}_3$ ):  $\delta$  9.86 (s, 1H), 8.38 (d,  $J = 4.8$  Hz, 1H), 7.78 (t,  $J = 8.0$  Hz, 2H), 7.19 (t,  $J = 7.6$  Hz, 2H), 7.07 (d,  $J = 4.0$  Hz, 1H);  $^{13}\text{C}$  NMR (100 MHz,  $\text{CDCl}_3$ ):  $\delta$  177.7, 163.8 ( $J = 248.5$  Hz), 156.6, 155.4, 130.9 ( $J = 7.4$  Hz), 128.3, 123.8, 121.5, 116.2 ( $J = 20.8$  Hz), 115.0.

*6-(4-Bromophenyl)imidazo[2,1-b]thiazole-5-carbaldehyde (32d)*

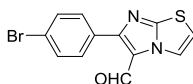

$^1\text{H}$  NMR (400 MHz,  $\text{CDCl}_3$ ):  $\delta$  9.87 (s, 1H), 8.37 (d,  $J = 4.8$  Hz, 1H), 7.67-7.61 (m, 4H), 7.07 (d,  $J = 3.6$  Hz, 1H);  $^{13}\text{C}$  NMR (100 MHz,  $\text{CDCl}_3$ ):  $\delta$  177.6, 156.7, 155.7, 132.1, 131.4, 130.5, 124.3, 124.0, 121.5, 114.9.

*6-(p-Tolyl)imidazo[2,1-b]thiazole-5-carbaldehyde (32e)*

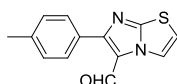

$^1\text{H}$  NMR (400 MHz,  $\text{CDCl}_3$ ):  $\delta$  9.89 (s, 1H), 8.37 (d,  $J = 4.8$  Hz, 1H), 7.69 (d,  $J = 8.0$  Hz, 2H), 7.31 (d,  $J = 8.0$  Hz, 2H), 7.03 (d,  $J = 4.8$  Hz, 1H);  $^{13}\text{C}$  NMR (100 MHz,  $\text{CDCl}_3$ ):  $\delta$  178.1, 158.4, 155.6, 139.9, 129.7, 129.0, 123.9, 121.5, 114.4, 21.4.

*6-(4-(Trifluoromethyl)phenyl)imidazo[2,1-b]thiazole-5-carbaldehyde (32f)*

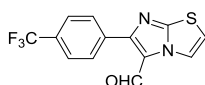

$^1\text{H}$  NMR (400 MHz,  $\text{CDCl}_3$ ):  $\delta$  9.93 (s, 1H), 8.41 (d,  $J = 4.0$  Hz, 1H), 7.93 (d,  $J = 8.0$  Hz, 2H), 7.78 (d,  $J = 8.0$  Hz, 2H), 7.11 (d,  $J = 4.4$  Hz, 1H);  $^{13}\text{C}$  NMR (100 MHz,  $\text{CDCl}_3$ ):  $\delta$  177.5, 155.9, 155.6, 135.9, 131.1 ( $J = 32.8$  Hz), 129.3, 125.8 ( $J = 3.4$  Hz), 124.3, 123.9 ( $J = 270.9$  Hz), 121.4, 115.3.

6-(4-Methoxyphenyl)imidazo[2,1-b]thiazole-5-carbaldehyde (**32g**)

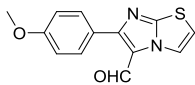

$^1\text{H}$  NMR (400 MHz,  $\text{CDCl}_3$ ):  $\delta$  9.88 (s, 1H), 8.37 (d,  $J = 4.8$  Hz, 1H), 7.75 (d,  $J = 8.8$  Hz, 2H), 7.04-7.02 (m, 3H), 3.88 (s, 3H);  $^{13}\text{C}$  NMR (100 MHz,  $\text{CDCl}_3$ ):  $\delta$  178.0, 161.0, 158.0, 155.5, 130.4, 124.8, 123.6, 121.6, 114.4, 114.3, 55.4.

6-(4-Isopropylphenyl)imidazo[2,1-b]thiazole-5-carbaldehyde (**32h**)

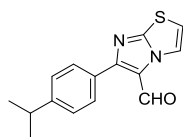

$^1\text{H}$  NMR (400 MHz,  $\text{CDCl}_3$ ):  $\delta$  9.91 (s, 1H), 8.38 (d,  $J = 4.0$  Hz, 1H), 7.73 (d,  $J = 8.0$  Hz, 2H), 7.37 (d,  $J = 8.8$  Hz, 2H), 7.04 (d,  $J = 4.0$  Hz, 1H), 3.02-2.95 (m, 1H), 1.30 (d,  $J = 6.4$  Hz, 6H);  $^{13}\text{C}$  NMR (100 MHz,  $\text{CDCl}_3$ ):  $\delta$  178.2, 158.5, 155.6, 150.8, 130.0, 129.1, 128.9, 127.1, 123.9, 121.5, 114.4, 34.0, 23.9.

6-(4-(tert-Butyl)phenyl)imidazo[2,1-b]thiazole-5-carbaldehyde (**32i**)

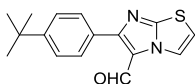

$^1\text{H}$  NMR (400 MHz,  $\text{CDCl}_3$ ):  $\delta$  9.92 (s, 1H), 8.40 (d,  $J = 4.4$  Hz, 1H), 7.74 (d,  $J = 8.0$  Hz, 2H), 7.54 (d,  $J = 8.8$  Hz, 2H), 7.07 (d,  $J = 4.0$  Hz, 1H), 1.37 (s, 9H);  $^{13}\text{C}$  NMR (100 MHz,  $\text{CDCl}_3$ ):  $\delta$  178.2, 158.3, 155.6, 153.1, 129.5, 128.8, 125.9, 123.9, 121.5, 114.5, 34.8, 31.2.

4-(5-Formylimidazo[2,1-b]thiazol-6-yl)benzonitrile (**32j**)

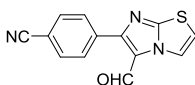

$^1\text{H}$  NMR (400 MHz,  $\text{CDCl}_3$ ):  $\delta$  9.94 (s, 1H), 8.41 (d,  $J = 4.0$  Hz, 1H), 7.93 (d,  $J = 8.0$  Hz, 2H), 7.81 (d,  $J = 7.6$  Hz, 2H), 7.13 (d,  $J = 4.8$  Hz, 1H);  $^{13}\text{C}$  NMR (100 MHz,  $\text{CDCl}_3$ ):  $\delta$  177.3, 155.8, 155.3, 136.8, 132.7, 129.5, 124.4, 121.5, 118.3, 115.6, 113.2.

6-(4-Cyclohexylphenyl)imidazo[2,1-b]thiazole-5-carbaldehyde (**32k**)

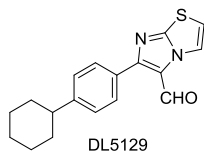

$^1\text{H}$  NMR (400 MHz,  $\text{CDCl}_3$ ):  $\delta$  9.91 (s, 1H), 8.39 (d,  $J = 4.0$  Hz, 1H), 7.72 (d,  $J = 8.8$  Hz, 2H), 7.35 (d,  $J = 7.6$  Hz, 2H), 7.03 (d,  $J = 4.8$  Hz, 1H), 2.60-2.56 (m, 1H), 1.94-1.76 (m, 5H), 1.52-1.26 (m, 5H);  $^{13}\text{C}$  NMR (100 MHz,  $\text{CDCl}_3$ ):  $\delta$  178.2, 158.5, 156.6, 150.0, 130.0, 129.1, 127.5, 123.9, 121.6, 114.4, 44.4, 34.3, 26.8, 26.1.

6-([1,1'-Biphenyl]-4-yl)imidazo[2,1-b]thiazole-5-carbaldehyde (**32l**)

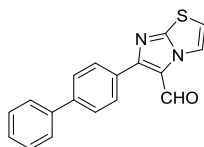

$^1\text{H}$  NMR (400 MHz,  $\text{CDCl}_3$ ):  $\delta$  9.98 (s, 1H), 8.42 (d,  $J = 4.8$  Hz, 1H), 7.89 (d,  $J = 8.4$  Hz, 2H), 7.75 (d,  $J = 8.4$  Hz, 2H), 7.66 (d,  $J = 7.6$  Hz, 2H), 7.48 (t,  $J = 7.6$  Hz, 2H), 7.40 (t,  $J = 7.6$  Hz, 1H), 7.09 (d,  $J = 4.8$  Hz, 1H);  $^{13}\text{C}$  NMR (100 MHz,  $\text{CDCl}_3$ ):  $\delta$  178.0, 157.3, 155.4, 142.6, 140.1, 130.9, 129.5, 128.9, 127.9, 127.7, 127.124.0, 121.6, 114.9.

6-(5,5,8,8-Tetramethyl-5,6,7,8-tetrahydronaphthalen-2-yl)imidazo[2,1-b]thiazole-5-carbaldehyde (**32m**)

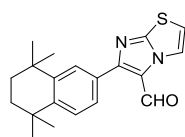

$^1\text{H}$  NMR (400 MHz,  $\text{CDCl}_3$ ):  $\delta$  9.87 (s, 1H), 8.33 (d,  $J = 4.8$  Hz, 1H), 7.71 (d,  $J = 1.6$  Hz, 1H), 7.52 (d,  $J = 7.6$  Hz, 1H), 7.41 (d,  $J = 8.8$  Hz, 1H), 6.98 (d,  $J = 4.8$  Hz, 1H),

1.69 (s, 4H), 1.32 (s, 6H), 1.29 (s, 6H);  $^{13}\text{C}$  NMR (100 MHz,  $\text{CDCl}_3$ ):  $\delta$  178.1, 158.8, 155.6, 146.8, 145.6, 129.7, 127.4, 127.2, 126.3, 123.9, 121.5, 114.4, 60.3, 34.9, 34.8, 34.4, 31.8, 31.7.

6-(3-Chlorophenyl)imidazo[2,1-b]thiazole-5-carbaldehyde (**32n**)

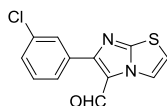

$^1\text{H}$  NMR (400 MHz,  $\text{CDCl}_3$ ):  $\delta$  9.89 (s, 1H), 8.37 (d,  $J = 4.8$  Hz, 1H), 7.79 (s, 1H), 7.65 (d,  $J = 6.4$  Hz, 1H), 7.43-7.39 (m, 2H), 7.07 (d,  $J = 4.0$  Hz, 1H),  $^{13}\text{C}$  NMR (100 MHz,  $\text{CDCl}_3$ ):  $\delta$  177.7, 156.2, 155.6, 135.0, 134.1, 130.2, 129.7, 129.0, 127.2, 124.1, 121.5, 115.1.

6-(Naphthalen-2-yl)imidazo[2,1-b]thiazole-5-carbaldehyde (**32o**)

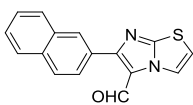

$^1\text{H}$  NMR (400 MHz,  $\text{CDCl}_3$ ):  $\delta$  10.00 (s, 1H), 8.41 (d,  $J = 4.8$  Hz, 1H), 8.27 (s, 1H), 7.99-7.89 (m, 4H), 7.56-7.54 (m, 2H), 7.07 (d,  $J = 4.4$  Hz, 1H);  $^{13}\text{C}$  NMR (100 MHz,  $\text{CDCl}_3$ ):  $\delta$  178.2, 158.1, 155.7, 133.7, 133.2, 129.7, 128.9, 128.8, 128.5, 127.8, 127.1, 126.8, 126.1, 124.2, 121.6, 114.8.

6-(Naphthalen-1-yl)imidazo[2,1-b]thiazole-5-carbaldehyde (**32p**)

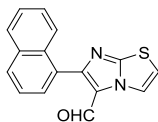

$^1\text{H}$  NMR (400 MHz,  $\text{CDCl}_3$ ):  $\delta$  9.61 (s, 1H), 8.44 (d,  $J = 3.6$  Hz, 1H), 8.32-8.29 (m, 1H), 8.00-7.93 (m, 2H), 7.65 (d, 7.2 Hz, 1H), 7.60-7.54 (m, 3H), 7.12 (d,  $J = 4.0$  Hz, 1H);  $^{13}\text{C}$  NMR (100 MHz,  $\text{CDCl}_3$ ):  $\delta$  178.3, 157.9, 155.5, 133.9, 132.0, 130.2, 129.7, 129.2, 128.3, 127.1, 126.4, 125.8, 125.5, 124.9, 121.3, 114.8.

6-Ethylimidazo[2,1-b]thiazole-5-carbaldehyde (**32q**)

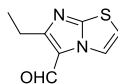

<sup>1</sup>H NMR (400 MHz, CDCl<sub>3</sub>): δ 9.81 (s, 1H), 8.26 (d, *J* = 3.6 Hz, 1H), 6.98 (d, *J* = 4.8 Hz, 1H), 2.99 (q, *J* = 8.0 Hz, 2H), 1.41 (t, *J* = 8.0 Hz, 3H); <sup>13</sup>C NMR (100 MHz, CDCl<sub>3</sub>): δ 175.6, 162.8, 155.6, 123.8, 121.2, 114.0, 21.7, 14.4.

To a solution of aldehyde **32** (1 mmol) in EtOH (5 mL) was added hydroxylamine **33** (1 mmol) followed by AcOH (5 mmol, 5 equiv). The reaction mixture was heated under reflux overnight. After cooled to room temperature, a saturated aqueous solution of NaHCO<sub>3</sub> (30 mL) was added. The aqueous layer was extracted with EtOAc (30 mL × 3) and the combined organics were washed with brine (45 mL), dried (Na<sub>2</sub>SO<sub>4</sub>). The crude product was then purified by flash chromatography to give the desired product.

*(E)*-6-(4-Chlorophenyl)imidazo[2,1-*b*]thiazole-5-carbaldehyde

*O*-(3,4-dichlorobenzyl) oxime (**1**)

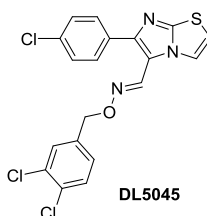

Yield 23%, <sup>1</sup>H NMR (400 MHz, CDCl<sub>3</sub>): δ 8.39 (s, 1H), 7.99 (d, *J* = 7.6 Hz, 1H), 7.59 (d, *J* = 8.0 Hz, 2H), 7.51 (s, 1H), 7.46-7.42 (m, 3H), 7.24 (d, *J* = 8.4 Hz, 1H), 6.92 (d, *J* = 4.4 Hz, 1H), 5.13 (s, 2H); <sup>13</sup>C NMR (100 MHz, CDCl<sub>3</sub>): δ 152.7, 149.3, 139.9, 137.7, 134.5, 132.6, 132.1, 131.9, 130.5, 130.1, 129.5, 129.0, 127.4, 121.5, 115.7, 113.0, 75.0; RMS (ESI): Exact mass calcd for C<sub>19</sub>H<sub>13</sub>Cl<sub>3</sub>N<sub>3</sub>OS [M+H]<sup>+</sup> 435.9845, found 435.9855; HPLC analysis: retention time = 12.25 min, peak area 98.0%, 80:20 CH<sub>3</sub>CN/H<sub>2</sub>O.



*(E)*-6-Phenylimidazo[2,1-*b*]thiazole-5-carbaldehyde *O*-(3,4-dichlorobenzyl) oxime (**2**)

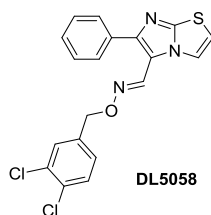

Yield 91%,  $^1\text{H}$  NMR (400 MHz,  $\text{CDCl}_3$ ):  $\delta$  8.44 (s, 1H), 8.00 (d,  $J = 4.8$  Hz, 1H), 7.66 (d,  $J = 6.8$  Hz, 2H), 7.52-7.37 (m, 5H), 7.25 (d,  $J = 8.4$  Hz, 1H), 6.91 (d,  $J = 4.8$  Hz, 1H), 5.13 (s, 2H);  $^{13}\text{C}$  NMR (100 MHz,  $\text{CDCl}_3$ ):  $\delta$  152.6, 150.6, 140.3, 137.9, 133.3, 132.6, 132.0, 130.5, 130.1, 128.8, 128.4, 127.4, 121.6, 115.6, 112.8, 74.9; RMS (ESI): Exact mass calcd for  $\text{C}_{19}\text{H}_{14}\text{Cl}_2\text{N}_3\text{OS}$   $[\text{M}+\text{H}]^+$  402.0234, found 402.0227; HPLC analysis: retention time = 8.01 min, peak area 97.4%, 80:20  $\text{CH}_3\text{CN}/\text{H}_2\text{O}$ .

*(E)*-6-(4-Fluorophenyl)imidazo[2,1-*b*]thiazole-5-carbaldehyde

*O*-(3,4-dichlorobenzyl) oxime (**3**)

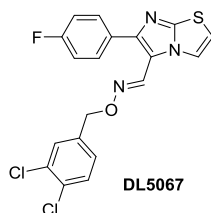

Yield 81%,  $^1\text{H}$  NMR (400 MHz,  $\text{CDCl}_3$ ):  $\delta$  8.38 (s, 1H), 7.99 (d,  $J = 3.6$  Hz, 1H), 7.64-7.61 (m, 2H), 7.51 (s, 1H), 7.44 (t,  $J = 4.8$  Hz, 1H), 7.24 ( $J = 8.4$  Hz, 1H), 7.17-7.12 (m, 2H), 6.91 (d,  $J = 4.8$  Hz, 1H), 5.13 (s, 2H);  $^{13}\text{C}$  NMR (100 MHz,  $\text{CDCl}_3$ ):  $\delta$  162.9 ( $J = 247$  Hz), 152.6, 149.5, 140.0, 137.8, 132.6, 132.0, 130.5, 130.14, 130.06, 129.5, 127.4, 121.5, 115.8 ( $J = 20.8$  Hz), 115.5, 112.9, 74.9; HRMS (ESI): Exact mass calcd for  $\text{C}_{19}\text{H}_{13}\text{Cl}_2\text{FN}_3\text{OS}$   $[\text{M}+\text{H}]^+$  420.0140, found 420.0137; HPLC analysis: retention time = 8.37 min, peak area 96.4%, 80:20  $\text{CH}_3\text{CN}/\text{H}_2\text{O}$ .

*(E)*-6-(4-Bromophenyl)imidazo[2,1-*b*]thiazole-5-carbaldehyde

*O*-(3,4-dichlorobenzyl) oxime (**4**)

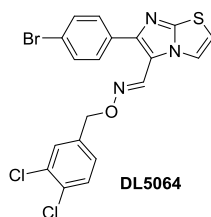

50%  $^1\text{H}$  NMR (400 MHz,  $\text{CDCl}_3$ ):  $\delta$  8.39 (s, 1H), 7.98 (d,  $J = 2.8$  Hz, 1H), 7.56-7.44 (m, 6H), 7.24 (d,  $J = 7.6$  Hz, 1H), 6.92 (d,  $J = 2.8$  Hz, 1H), 5.13 (s, 2H);  $^{13}\text{C}$  NMR (100 MHz,  $\text{CDCl}_3$ ):  $\delta$  152.7, 149.2, 139.9, 137.7, 132.6, 132.5, 132.3, 131.9, 130.5, 130.1, 129.8, 127.4, 122.7, 121.5, 115.7, 113.1, 75.0; HRMS (ESI): Exact mass calcd for  $\text{C}_{19}\text{H}_{13}\text{BrN}_3\text{OS}$   $[\text{M}+\text{H}]^+$  479.9340, found 479.9454; HPLC analysis: retention time = 13.64 min, peak area 95.2%, 80:20  $\text{CH}_3\text{CN}/\text{H}_2\text{O}$ .

*(E)*-6-(*p*-Tolyl)imidazo[2,1-*b*]thiazole-5-carbaldehyde *O*-(3,4-dichlorobenzyl) oxime  
(5)

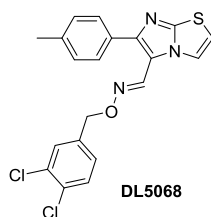

Yield 92%,  $^1\text{H}$  NMR (400 MHz,  $\text{CDCl}_3$ ):  $\delta$  8.43 (s, 1H), 7.99 (d,  $J = 4.0$  Hz, 1H), 7.56-7.51 (m, 3H), 7.45 (d,  $J = 8.0$  Hz, 1H), 7.28-7.24 (m, 3H), 6.89 (d,  $J = 4.0$  Hz, 1H), 5.13 (s, 2H), 2.40 (s, 3H);  $^{13}\text{C}$  NMR (100 MHz,  $\text{CDCl}_3$ ):  $\delta$  152.5, 150.8, 140.4, 138.4, 137.9, 132.6, 132.0, 130.5, 130.1, 129.5, 128.3, 127.4, 121.6, 115.3, 112.6, 74.8, 21.3; HRMS (ESI): Exact mass calcd for  $\text{C}_{20}\text{H}_{16}\text{Cl}_2\text{N}_3\text{OS}$   $[\text{M}+\text{H}]^+$  416.0391, found 416.0384; HPLC analysis: retention time = 10.75 min, peak area 95.7%, 80:20  $\text{CH}_3\text{CN}/\text{H}_2\text{O}$ .

*(E)*-6-(4-(Trifluoromethyl)phenyl)imidazo[2,1-*b*]thiazole-5-carbaldehyde

*O*-(3,4-dichlorobenzyl) oxime (**6**)

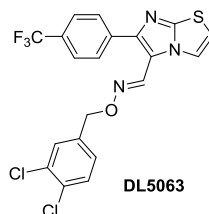

Yield 90%, <sup>1</sup>H NMR (400 MHz, CDCl<sub>3</sub>): δ 8.42 (s, 1H), 8.00 (d, *J* = 4.8 Hz, 1H), 7.78 (d, *J* = 8.8 Hz, 2H), 7.71 (d, *J* = 8.4 Hz, 2H), 7.52 (s, 1H), 7.45 (d, *J* = 8.8 Hz, 1H), 7.24 (d, *J* = 7.6 Hz, 1H), 6.95 (d, *J* = 4.8 Hz, 1H), 5.14 (s, 2H); <sup>13</sup>C NMR (100 MHz, CDCl<sub>3</sub>): δ 152.8, 148.7, 139.7, 137.7, 136.9, 132.6, 132.1, 130.5, 130.3, 130.1, 128.5, 127.4, 126.8 (*J* = 270.9 Hz), 125.7, 121.5, 116.3, 113.4, 75.0; HRMS (ESI): Exact mass calcd for C<sub>20</sub>H<sub>13</sub>Cl<sub>2</sub>F<sub>3</sub>N<sub>3</sub>OS [M+H]<sup>+</sup> 470.0108, found 470.0100; HPLC analysis: retention time = 5.38 min, peak area 97.6%, 80:20 CH<sub>3</sub>CN/H<sub>2</sub>O.

*(E)*-6-(4-Methoxyphenyl)imidazo[2,1-*b*]thiazole-5-carbaldehyde

*O*-(3,4-dichlorobenzyl) oxime (**7**)

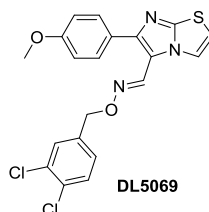

Yield 93%, <sup>1</sup>H NMR (400 MHz, CDCl<sub>3</sub>): δ 8.41 (s, 1H), 7.97 (d, *J* = 3.2 Hz, 1H), 7.59 (d, *J* = 8.0 Hz, 2H), 7.51 (s, 1H), 7.44 (d, *J* = 7.6 Hz, 1H), 7.24 (d, *J* = 8.0 Hz, 1H), 6.98 (d, *J* = 7.6 Hz, 2H), 6.87 (d, *J* = 3.2 Hz, 1H), 5.12 (s, 2H), 3.85 (s, 3H); <sup>13</sup>C NMR (100 MHz, CDCl<sub>3</sub>): δ 159.9, 152.5, 150.6, 140.4, 137.9, 132.5, 132.0, 130.5, 130.1, 129.6, 127.4, 126.0, 121.6, 115.0, 114.2, 112.4, 74.8, 55.3; HRMS (ESI): Exact mass calcd for C<sub>20</sub>H<sub>16</sub>Cl<sub>2</sub>N<sub>3</sub>O<sub>2</sub>S [M+H]<sup>+</sup> 432.0340, found 432.0346; HPLC analysis: retention time = 6.36 min, peak area 95.4%, 80:20 CH<sub>3</sub>CN/H<sub>2</sub>O.

*(E)*-6-(4-Isopropylphenyl)imidazo[2,1-*b*]thiazole-5-carbaldehyde

*O*-(3,4-dichlorobenzyl) oxime (**8**)

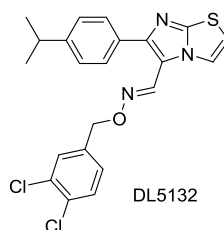

Yield 71%,  $^1\text{H}$  NMR (400 MHz,  $\text{CDCl}_3$ ):  $\delta$  8.45 (s, 1H), 7.99 (d,  $J = 3.6$  Hz, 1H), 7.59 (d,  $J = 8.0$  Hz, 2H), 7.51 (s, 1H), 7.44 (d,  $J = 7.6$  Hz, 1H), 7.32 (d,  $J = 8.0$  Hz, 2H), 7.24 (d,  $J = 8.0$  Hz, 1H), 6.88 (d,  $J = 3.6$  Hz, 1H), 5.12 (s, 2H), 2.99-2.92 (m, 1H), 1.29 (d,  $J = 7.2$  Hz, 6H);  $^{13}\text{C}$  NMR (100 MHz,  $\text{CDCl}_3$ ):  $\delta$  152.5, 150.9, 149.3, 140.5, 137.9, 132.5, 132.0, 130.9, 130.5, 130.1, 128.4, 127.4, 126.9, 125.8, 121.6, 115.3, 112.5, 74.8, 33.9, 23.9; HRMS (ESI): Exact mass calcd for  $\text{C}_{22}\text{H}_{20}\text{Cl}_2\text{N}_3\text{OS}$   $[\text{M}+\text{H}]^+$  444.0704, found 444.0700; HPLC analysis: retention time = 15.80 min, peak area 95.2%, 80:20  $\text{CH}_3\text{CN}/\text{H}_2\text{O}$ .

*(E)*-6-(4-(*tert*-Butyl)phenyl)imidazo[2,1-*b*]thiazole-5-carbaldehyde

*O*-(3,4-dichlorobenzyl) oxime (**9**)

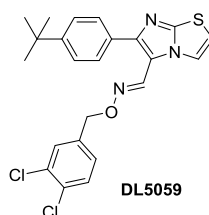

Yield 98%,  $^1\text{H}$  NMR (400 MHz,  $\text{CDCl}_3$ ):  $\delta$  8.45 (s, 1H), 7.98 (d,  $J = 4.4$  Hz, 1H), 7.60 (d,  $J = 8.8$  Hz, 2H), 7.51-7.42 (m, 4H), 7.23 (d,  $J = 8.0$  Hz, 1H), 6.87 (d,  $J = 4.8$  Hz, 1H), 5.12 (s, 2H), 1.36 (s, 9H);  $^{13}\text{C}$  NMR (100 MHz,  $\text{CDCl}_3$ ):  $\delta$  152.5, 151.6, 150.7, 140.5, 137.9, 132.5, 131.9, 130.5, 130.0, 128.1, 127.4, 125.7, 121.6, 115.4, 112.6, 74.8, 34.7, 31.3; HRMS (ESI): Exact mass calcd for  $\text{C}_{23}\text{H}_{22}\text{Cl}_2\text{N}_3\text{OS}$   $[\text{M}+\text{H}]^+$  458.0860, found 458.0864; HPLC analysis: retention time = 19.74 min, peak area 97.3%, 80:20  $\text{CH}_3\text{CN}/\text{H}_2\text{O}$ .

*(E)*-4-(5-(((3,4-Dichlorobenzyl)oxy)imino)methyl)imidazo[2,1-*b*]thiazol-6-yl)benzoni-  
trile (**10**)

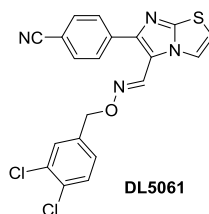

Yield 80%,  $^1\text{H}$  NMR (400 MHz,  $\text{CDCl}_3$ ):  $\delta$  8.41 (s, 1H), 8.00 (d,  $J = 2.8$  Hz, 1H), 7.76 (d,  $J = 8.4$  Hz, 2H), 7.71 (d,  $J = 7.6$  Hz, 2H), 7.51 (s, 1H), 7.45 (d,  $J = 8.0$  Hz, 1H), 7.24 (d,  $J = 8.4$  Hz, 1H), 6.97 (d,  $J = 4.0$  Hz, 1H), 5.15 (s, 2H);  $^{13}\text{C}$  NMR (100 MHz,  $\text{CDCl}_3$ ):  $\delta$  153.0, 147.8, 139.4, 137.9, 137.6, 132.5, 132.2, 130.6, 130.1, 128.7, 128.1, 127.4, 121.5, 118.7, 116.6, 113.7, 111.7, 75.1; HRMS (ESI): Exact mass calcd for  $\text{C}_{20}\text{H}_{13}\text{Cl}_2\text{N}_4\text{OS}$   $[\text{M}+\text{H}]^+$  427.0184, found 427.0188; HPLC analysis: retention time = 12.64 min, peak area 96.8%, 80:20  $\text{CH}_3\text{CN}/\text{H}_2\text{O}$ .

*(E)*-6-(4-Cyclohexylphenyl)imidazo[2,1-*b*]thiazole-5-carbaldehyde  
*O*-(3,4-dichlorobenzyl) oxime (**11**)

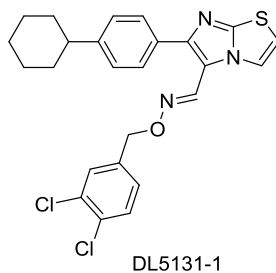

Yield 79%,  $^1\text{H}$  NMR (400 MHz,  $\text{CDCl}_3$ ):  $\delta$  8.45 (s, 1H), 7.98 (d,  $J = 4.4$  Hz, 1H), 7.58 (d,  $J = 8.4$  Hz, 2H), 7.51 (s, 1H), 7.44 (d,  $J = 8.4$  Hz, 1H), 7.30-7.23 (m, 3H), 6.87 (d,  $J = 4.8$  Hz, 1H), 5.12 (s, 2H), 2.55 (t,  $J = 7.6$  Hz, 1H), 1.92-1.75 (m, 5H), 1.50-1.26 (m, 5H);  $^{13}\text{C}$  NMR (100 MHz,  $\text{CDCl}_3$ ):  $\delta$  152.5, 150.9, 148.5, 140.5, 137.9, 132.5, 132.0, 130.9, 130.5, 130.1, 128.3, 127.4, 127.3, 121.6, 115.3, 112.5, 74.8, 44.4, 34.4, 26.9, 26.1; HRMS (ESI): Exact mass calcd for  $\text{C}_{25}\text{H}_{24}\text{Cl}_2\text{N}_3\text{OS}$   $[\text{M}+\text{H}]^+$  484.1017, found 484.1034; HPLC analysis: retention time = 43.23 min, peak area 96.5%, 80:20  $\text{CH}_3\text{CN}/\text{H}_2\text{O}$ .

*(E)*-6-([1,1'-Biphenyl]-4-yl)imidazo[2,1-*b*]thiazole-5-carbaldehyde

*O*-(3,4-dichlorobenzyl) oxime (**12**)

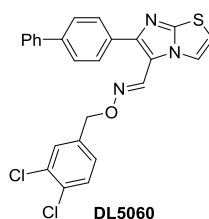

Yield 84%, <sup>1</sup>H NMR (400 MHz, CDCl<sub>3</sub>): δ 8.50 (s, 1H), 8.01 (d, *J* = 4.0 Hz, 1H), 7.76-7.64 (m, 6H), 7.49-7.44 (m, 4H), 7.38 (t, *J* = 7.2 Hz, 1H), 7.25 (d, *J* = 7.6 Hz, 1H), 6.90 (d, *J* = 4.0 Hz, 1H), 5.14 (s, 2H); <sup>13</sup>C NMR (100 MHz, CDCl<sub>3</sub>): δ 152.7, 150.2, 141.1, 140.4, 140.3, 137.9, 132.6, 132.4, 132.0, 130.5, 130.1, 128.9, 128.7, 127.6, 127.44, 127.40, 127.1, 121.6, 115.6, 112.8, 74.9; HRMS (ESI): Exact mass calcd for C<sub>25</sub>H<sub>18</sub>Cl<sub>2</sub>N<sub>3</sub>OS [M+H]<sup>+</sup> 478.0547, found 478.0542; HPLC analysis: retention time = 17.33 min, peak area 97.0%, 80:20 CH<sub>3</sub>CN/H<sub>2</sub>O.

*(E)*-6-(5,5,8,8-Tetramethyl-5,6,7,8-tetrahydronaphthalen-2-yl)imidazo[2,1-*b*]thiazole-5-carbaldehyde *O*-(3,4-dichlorobenzyl) oxime (**13**)

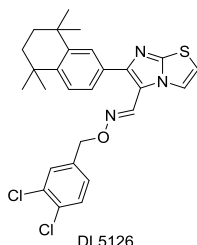

Yield 59%, <sup>1</sup>H NMR (400 MHz, CDCl<sub>3</sub>): δ 8.42 (s, 1H), 7.99 (d, *J* = 3.6 Hz, 1H), 7.61 (s, 1H), 7.51 (s, 1H), 7.44 (d, *J* = 7.6 Hz, 1H), 7.37 (t, *J* = 7.6 Hz, 2H), 7.24 (d, *J* = 8.4 Hz, 1H), 6.88 (d, *J* = 3.6 Hz, 1H), 5.13 (s, 2H), 1.72 (s, 4H), 1.35 (s, 6H), 1.32 (s, 6H); <sup>13</sup>C NMR (100 MHz, CDCl<sub>3</sub>): δ 152.5, 151.3, 145.4, 140.7, 138.1, 132.5, 131.9, 130.5, 130.0, 127.3, 127.0, 126.6, 125.6, 121.6, 115.3, 112.5, 74.8, 35.1, 34.9, 34.4, 34.3, 31.9, 31.8; HRMS (ESI): Exact mass calcd for C<sub>27</sub>H<sub>28</sub>N<sub>3</sub>OS [M+H]<sup>+</sup> 521.1330, found 512.1341; HPLC analysis: retention time = 52.94 min, peak area 96.4%, 80:20 CH<sub>3</sub>CN/H<sub>2</sub>O.

*(E)*-6-(3-Chlorophenyl)imidazo[2,1-*b*]thiazole-5-carbaldehyde

*O*-(3,4-dichlorobenzyl) oxime (**14**)

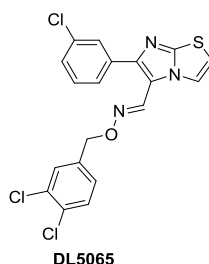

Yield 99%, <sup>1</sup>H NMR (400 MHz, CDCl<sub>3</sub>): δ 8.42 (s, 1H), 8.00 (d, *J* = 4.0 Hz, 1H), 7.68 (s, 1H), 7.52 (s, 2H), 7.46 (d, *J* = 8.8 Hz, 1H), 7.38 (t, *J* = 7.6 Hz, 2H), 7.25 (d, *J* = 8.4 Hz, 1H), 6.94 (d, *J* = 4.0 Hz, 1H), 5.15 (s, 2H); <sup>13</sup>C NMR (100 MHz, CDCl<sub>3</sub>): δ 152.7, 148.8, 139.8, 137.7, 135.1, 134.8, 132.6, 132.1, 130.5, 130.1, 130.0, 128.5, 128.3, 127.4, 126.4, 121.6, 115.9, 113.2, 75.0; HRMS (ESI): Exact mass calcd for C<sub>19</sub>H<sub>13</sub>Cl<sub>3</sub>N<sub>3</sub>OS [M+H]<sup>+</sup> 435.9874, found 435.9850; HPLC analysis: retention time = 12.90 min, peak area 97.2%, 80:20 CH<sub>3</sub>CN/H<sub>2</sub>O.

*(E)*-6-(Naphthalen-2-yl)imidazo[2,1-*b*]thiazole-5-carbaldehyde

*O*-(3,4-dichlorobenzyl) oxime (**15**)

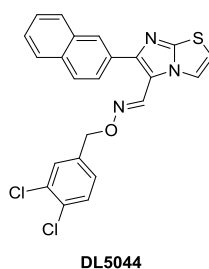

Yield 24%, <sup>1</sup>H NMR (400 MHz, CDCl<sub>3</sub>): δ 8.54 (s, 1H), 8.11 (s, 1H), 8.03 (d, *J* = 4.4 Hz, 1H), 7.94-7.81 (m, 4H), 7.53-7.44 (m, 4H), 7.25 (d, *J* = 6.8 Hz, 1H), 6.93 (d, *J* = 4.4 Hz, 1H), 5.15 (s, 2H); <sup>13</sup>C NMR (100 MHz, CDCl<sub>3</sub>): δ 152.7, 150.6, 140.4, 137.8, 133.3, 133.1, 132.0, 130.8, 130.5, 130.1, 128.5, 128.3, 127.7, 127.5, 127.4, 126.5, 126.0, 121.6, 115.8, 112.8, 74.9; HRMS (ESI): Exact mass calcd for C<sub>23</sub>H<sub>16</sub>Cl<sub>2</sub>N<sub>3</sub>OS [M+H]<sup>+</sup> 452.0391, found 425.0397; HPLC analysis: retention time = 13.55 min, peak area 96.2%, 80:20 CH<sub>3</sub>CN/H<sub>2</sub>O.

*(E)*-6-(Naphthalen-1-yl)imidazo[2,1-*b*]thiazole-5-carbaldehyde

*O*-(3,4-dichlorobenzyl) oxime (**16**)

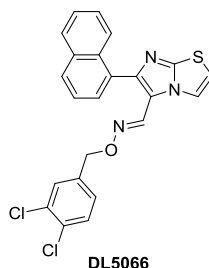

Yield 79%,  $^1\text{H}$  NMR (400 MHz,  $\text{CDCl}_3$ ):  $\delta$  8.22 (t,  $J = 5.6$  Hz, 1H), 8.11 (s, 1H), 8.05 (d,  $J = 4.0$  Hz, 1H), 7.94-7.91 (m, 2H), 7.90-7.41 (m, 6H), 7.19 (d,  $J = 7.6$  Hz, 1H), 6.96 (d,  $J = 4.0$  Hz, 1H), 5.08 (s, 2H);  $^{13}\text{C}$  NMR (100 MHz,  $\text{CDCl}_3$ ):  $\delta$  152.4, 150.0, 140.2, 137.9, 133.9, 132.5, 132.1, 131.9, 130.5, 130.2, 130.0, 129.3, 128.8, 128.2, 127.3, 126.7, 126.13, 126.10, 125.0, 121.4, 112.9, 74.8; HRMS (ESI): Exact mass calcd for  $\text{C}_{23}\text{H}_{16}\text{Cl}_2\text{N}_3\text{OS}$   $[\text{M}+\text{H}]^+$  452.0391, found 452.0399; HPLC analysis: retention time = 9.87 min, peak area 95.7%, 80:20  $\text{CH}_3\text{CN}/\text{H}_2\text{O}$ .

*(E)*-*N*-(3,4-Dichlorophenethyl)-1-(6-ethylimidazo[2,1-*b*]thiazol-5-yl)methanimine

(**17**)

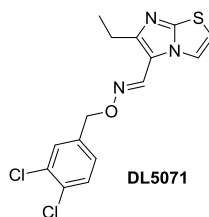

Yield 75%,  $^1\text{H}$  NMR (400 MHz,  $\text{CDCl}_3$ ):  $\delta$  8.25 (s, 1H), 7.88 (d,  $J = 4.8$  Hz, 1H), 7.51 (s, 1H), 7.44 (d,  $J = 8.4$  Hz, 1H), 7.24 (d,  $J = 7.6$  Hz, 1H), 6.83 (d,  $J = 3.6$  Hz, 1H), 5.10 (s, 2H), 2.72 (q,  $J = 7.2$  Hz, 2H), 1.31 (d,  $J = 7.6$  Hz, 3H);  $^{13}\text{C}$  NMR (100 MHz,  $\text{CDCl}_3$ ):  $\delta$  154.1, 152.1, 138.9, 138.0, 132.5, 131.9, 130.4, 130.1, 127.5, 127.4, 121.2, 115.0, 112.0, 74.7, 21.3, 14.4; HRMS (ESI): Exact mass calcd for  $\text{C}_{15}\text{H}_{14}\text{Cl}_2\text{N}_3\text{OS}$   $[\text{M}+\text{H}]^+$  354.0234, found 354.0219; HPLC analysis: retention time = 4.85 min, peak area 98.9%, 80:20  $\text{CH}_3\text{CN}/\text{H}_2\text{O}$ .



### 3. General Procedure for the Synthesis of Compounds 18-29

A solution of oxazol-2-amine (5 mmol, 1 equiv) and bromomethyl ketone **30** (5 mmol, 1 equiv) in THF (20 mL) and CH<sub>3</sub>CN (30 mL) was stirred at room temperature for 24 h. The precipitation from the reaction mixture was collected by filtration and then washed using CH<sub>3</sub>CN. To a mixture of the resulting solid in toluene (50 mL) at 0 °C was added titanium (IV) chloride (0.94 g, 5 mmol) as a solution in toluene (5 mL) over 30 min. The reaction mixture was heated at 100 °C for an additional 3 h, and cooled. The solvent was removed by rotary evaporation, and ice was added to the residue. The pH value of the resulting mixture was adjusted to 9 using Na<sub>2</sub>CO<sub>3</sub>, and the resulting solution was extracted using EtOAc (30 mL × 3). The organic layers were combined, and dried over Na<sub>2</sub>SO<sub>4</sub>. The concentrated crude product was dried overnight under vacuum to get the imidazooxazole **35** that was used without further purification.<sup>3</sup>

The Vilsmeier reagent was prepared by dropping of POCl<sub>3</sub> (16.5 mmol, 3.3 equiv) into a solution of DMF (5 mmol, 1.0 equiv) in CHCl<sub>3</sub> (5 mL) at 0 °C. To the resulting mixture at 0-5 °C was added a solution of imidazothiazole **35** (5 mmol) in CHCl<sub>3</sub> (30 mL) dropwise. The reaction was warmed to the room temperature over 1 h, and then heated under reflux for an additional 5 h. The solvent was removed under reduced pressure and the resulting residue was poured onto ice. The crude aldehyde **36** was collected by filtration and further purified using flash chromatography.

*6-(4-Chlorophenyl)imidazo[2,1-b]oxazole-5-carbaldehyde (36a)*

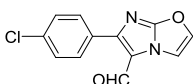

<sup>1</sup>H NMR (400 MHz, CDCl<sub>3</sub>): δ 9.85 (s, 1H), 7.97 (s, 1H), 7.74 (d, *J* = 8.8 Hz, 2H), 7.57 (s, 1H), 7.47 (d, *J* = 8.4 Hz, 2H); <sup>13</sup>C NMR (100 MHz, CDCl<sub>3</sub>): δ 177.9, 154.7, 139.2 (2C), 136.0, 131.0, 130.1 (2C), 129.2 (2C), 120.4, 113.9.

6-(Naphthalen-2-yl)imidazo[2,1-b]oxazole-5-carbaldehyde (**36b**)

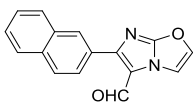

$^1\text{H}$  NMR (400 MHz,  $\text{CDCl}_3$ ):  $\delta$  9.98 (s, 1H), 8.28 (s, 1H), 8.00-7.89 (m, 5H), 7.58-7.55 (m, 3H);  $^{13}\text{C}$  NMR (100 MHz,  $\text{CDCl}_3$ ):  $\delta$  178.5, 156.2, 139.2, 139.0, 133.8, 133.2, 129.9, 128.8, 128.6, 127.8, 127.2, 126.8, 125.9, 121.2, 114.0, 113.9.

To a solution of aldehyde **36** (1 mmol) in EtOH (5ml) was added hydroxylamine **33** (1 mmol) followed by AcOH (5 mmol 5 equiv). The reaction mixture was heated under reflux over light. After cooled to room temperature, a saturated aqueous solution of  $\text{NaHCO}_3$  (30 mL) was added. The aqueous layer was extracted with EtOAc (30 mL  $\times$  3) and the combined organics were washed with brine (45 mL), dried ( $\text{Na}_2\text{SO}_4$ ). The crude product was then purified by flash column chromatography to give the desired product.

(*E*)-6-(4-Chlorophenyl)imidazo[2,1-b]oxazole-5-carbaldehyde

*O*-(3,4-dichlorobenzyl) oxime (**18**)

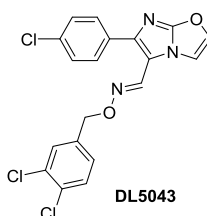

Yield 24%,  $^1\text{H}$  NMR (400 MHz,  $\text{CDCl}_3$ ):  $\delta$  8.35 (s, 1H), 7.57 (d,  $J = 8.4$  Hz, 3H), 7.50 (s, 1H), 7.46-7.39 (m, 4H), 7.23 (d,  $J = 8.8$  Hz, 1H), 5.11 (s, 2H);  $^{13}\text{C}$  NMR (100 MHz,  $\text{CDCl}_3$ ):  $\delta$  156.2, 146.0, 139.9, 137.9, 137.7, 134.3, 132.6, 132.0, 130.5, 130.2, 130.1, 129.3, 129.0, 127.4, 113.8, 111.7, 74.9; HRMS (ESI): Exact mass calcd for  $\text{C}_{19}\text{H}_{13}\text{Cl}_3\text{N}_3\text{O}_2$   $[\text{M}+\text{H}]^+$  420.0073.0678, found 420.0069; HPLC analysis: retention time = 9.35 min, peak area 96.8%, 80:20  $\text{CH}_3\text{CN}/\text{H}_2\text{O}$ .

*(E)*-6-(Naphthalen-2-yl)imidazo[2,1-*b*]oxazole-5-carbaldehyde

*O*-(3,4-dichlorobenzyl) oxime (**19**)

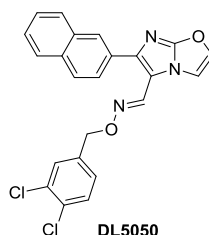

Yield 23%,  $^1\text{H}$  NMR (400 MHz,  $\text{CDCl}_3$ ):  $\delta$  8.50 (s, 1H), 8.10 (s, 1H), 7.92-7.79 (m, 4H), 7.62 (s, 1H), 7.52-7.45 (m, 5H), 7.25 (d,  $J = 9.2$  Hz, 1H), 5.13 (s, 2H);  $^{13}\text{C}$  NMR (100 MHz,  $\text{CDCl}_3$ ):  $\delta$  156.3, 147.3, 140.4, 137.9, 133.3, 133.1, 132.6, 132.0, 131.0, 130.5, 130.1, 128.5, 128.3, 127.7, 127.4 (2C), 127.2, 126.5 (2C), 125.8, 113.9, 111.9, 74.9; RMS (ESI): Exact mass calcd for  $\text{C}_{23}\text{H}_{16}\text{Cl}_2\text{N}_3\text{O}_2$   $[\text{M}+\text{H}]^+$  436.0619, found 436.0620; HPLC analysis: retention time = 10.04 min, peak area 95.4%, 80:20  $\text{CH}_3\text{CN}/\text{H}_2\text{O}$ .

*(E)*-6-(Naphthalen-2-yl)imidazo[2,1-*b*]oxazole-5-carbaldehyde

*O*-(2,4-dichlorobenzyl) oxime (**20**)

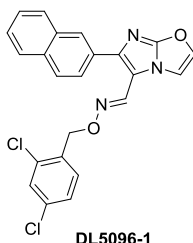

Yield 46%,  $^1\text{H}$  NMR (400 MHz,  $\text{CDCl}_3$ ):  $\delta$  8.52 (s, 1H), 8.10 (s, 1H), 7.91-7.79 (m, 4H), 7.65 (s, 1H), 7.53-7.48 (m, 2H), 4.43-7.41 (m, 3H), 7.27 (d,  $J = 8.8$  Hz, 1H), 5.26 (s, 2H);  $^{13}\text{C}$  NMR (100 MHz,  $\text{CDCl}_3$ ):  $\delta$  156.3, 147.1, 140.4, 137.8, 134.3, 134.05, 133.97, 133.3, 133.0, 131.0, 130.8, 129.3, 128.5, 128.3, 127.7, 127.2, 127.16, 126.5, 126.4, 125.8, 114.0, 111.9, 72.8; HRMS (ESI): Exact mass calcd for  $\text{C}_{23}\text{H}_{16}\text{Cl}_2\text{N}_3\text{O}_2$   $[\text{M}+\text{H}]^+$  436.0619, found 436.624; HPLC analysis: retention time = 11.71 min, peak area 96.6%, 80:20  $\text{CH}_3\text{CN}/\text{H}_2\text{O}$ .

*(E)*-6-(Naphthalen-2-yl)imidazo[2,1-*b*]oxazole-5-carbaldehyde *O*-(2-chlorobenzyl)  
oxime (**21**)

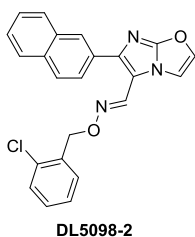

Yield 41%, <sup>1</sup>H NMR (400 MHz, CDCl<sub>3</sub>): δ 8.54 (s, 1H), 8.11 (s, 1H), 7.91-7.80 (m, 4H), 7.68 (d, *J* = 1.6 Hz, 1H), 7.53-7.49 (m, 3H), 7.41 (d, *J* = 1.6 Hz, 2H), 7.31-7.27 (m, 2H), 5.33 (s, 2H); <sup>13</sup>C NMR (100 MHz, CDCl<sub>3</sub>): δ 156.3, 146.9, 140.1, 137.8, 135.3, 133.5, 133.3, 133.0, 131.1, 130.2, 129.5, 129.3, 128.5, 128.3, 127.7, 127.2, 126.8, 126.44, 126.38, 125.8, 114.0, 112.1, 73.5; HRMS (ESI): Exact mass calcd for C<sub>23</sub>H<sub>17</sub>ClN<sub>3</sub>O<sub>2</sub> [M+H]<sup>+</sup> 402.1009, found 402.1015; HPLC analysis: retention time = 6.20 min, peak area 95.7%, 80:20 CH<sub>3</sub>CN/H<sub>2</sub>O.

*(E)*-6-(Naphthalen-2-yl)imidazo[2,1-*b*]oxazole-5-carbaldehyde *O*-(4-chlorobenzyl)  
oxime (**22**)

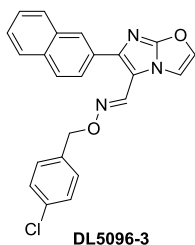

Yield 44%, <sup>1</sup>H NMR (400 MHz, CDCl<sub>3</sub>): δ 8.50 (s, 1H), 8.10 (s, 1H), 7.91-7.79 (m, 4H), 7.61 (s, 1H), 7.51-7.47 (m, 2H), 7.42 (s, 1H), 7.36 (s, 5H), 5.15 (s, 2H); <sup>13</sup>C NMR (100 MHz, CDCl<sub>3</sub>): δ 156.3, 146.9, 140.1, 137.8, 136.0, 133.9, 133.3, 133.0, 131.0, 129.7, 128.7, 128.5, 128.3, 127.7, 127.2, 126.5, 126.4, 125.8, 113.9, 112.0, 75.7; HRMS (ESI): Exact mass calcd for C<sub>25</sub>H<sub>20</sub>N<sub>3</sub>O<sub>2</sub> [M+H]<sup>+</sup> 402.1009, found 402.1000; HPLC analysis: retention time = 6.42 min, peak area 97.7%, 80:20 CH<sub>3</sub>CN/H<sub>2</sub>O.

*(E)*-6-(Naphthalen-2-yl)imidazo[2,1-*b*]oxazole-5-carbaldehyde *O*-benzyl oxime (**23**)

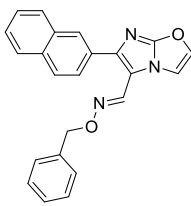

DL5098-3

Yield 71%,  $^1\text{H}$  NMR (400 MHz,  $\text{CDCl}_3$ ):  $\delta$  8.52 (s, 1H), 8.10 (s, 1H), 7.91-7.79 (m, 4H), 7.67 (s, 1H), 7.53-7.33 (m, 8H), 5.21 (s, 2H);  $^{13}\text{C}$  NMR (100 MHz,  $\text{CDCl}_3$ ):  $\delta$  156.2, 146.7, 139.8, 137.7, 137.3, 133.3, 133.0, 131.1, 128.5, 128.4, 128.3, 128.1, 127.7, 127.1, 126.41, 126.37, 125.8, 114.0, 112.2, 76.6; HRMS (ESI): Exact mass calcd for  $\text{C}_{23}\text{H}_{18}\text{N}_3\text{O}_2$   $[\text{M}+\text{H}]^+$  368.1399, found 368.1397; HPLC analysis: retention time = 5.41 min, peak area 95.4%, 80:20  $\text{CH}_3\text{CN}/\text{H}_2\text{O}$ .

*(E)*-6-(Naphthalen-2-yl)imidazo[2,1-*b*]oxazole-5-carbaldehyde *O*-(2,3-dihydro-1*H*-inden-2-yl) oxime (**24**)

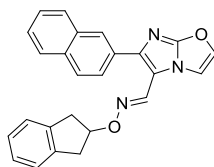

DL5090

Yield 64%,  $^1\text{H}$  NMR (400 MHz,  $\text{CDCl}_3$ ):  $\delta$  8.41 (s, 1H), 8.08 (s, 1H), 7.87-7.77 (m, 4H), 4.9 (t,  $J = 4.8$  Hz, 2H), 7.39 (d,  $J = 1.6$  Hz, 2H), 7.28-7.20 (m, 4H), 5.16 (s, 1H), 3.37-3.23 (m, 4H);  $^{13}\text{C}$  NMR (100 MHz,  $\text{CDCl}_3$ ):  $\delta$  156.1, 146.3, 141.2, 139.7, 137.6, 133.3, 133.0, 1331.1, 128.4, 128.3, 127.7, 127.1, 126.6, 126.4, 126.3, 125.8, 124.6, 114.0, 83.4, 39.2; HRMS (ESI): Exact mass calcd for  $\text{C}_{25}\text{H}_{20}\text{N}_3\text{O}_2$   $[\text{M}+\text{H}]^+$  394.1555, found 394.1563; HPLC analysis: retention time = 6.67 min, peak area 96.3%, 80:20  $\text{CH}_3\text{CN}/\text{H}_2\text{O}$ .

*(E)*-6-(Naphthalen-2-yl)imidazo[2,1-*b*]oxazole-5-carbaldehyde

*O*-(*perfluorophenyl*)methyl oxime (**25**)

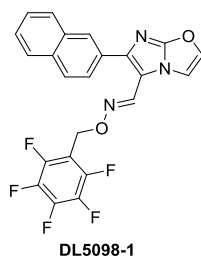

Yield 35%,  $^1\text{H}$  NMR (400 MHz,  $\text{CDCl}_3$ ):  $\delta$  8.41 (s, 1H), 8.06 (s, 1H), 7.99-7.83 (m, 3H), 7.76 (d,  $J = 7.6$  Hz, 1H), 7.71 (s, 1H), 7.51-7.49 (m, 3H), 5.25 (s, 2H);  $^{13}\text{C}$  NMR (100 MHz,  $\text{CDCl}_3$ ):  $\delta$  156.4, 147.6, 147.0, 144.5, 142.8, 140.9, 138.7, 138.0, 133.3, 133.1, 130.8, 128.5, 128.3, 127.7, 127.2, 126.5, 125.7, 113.8, 111.6, 62.6; HRMS (ESI): Exact mass calcd for  $\text{C}_{23}\text{H}_{13}\text{F}_5\text{N}_3\text{O}_2$   $[\text{M}+\text{H}]^+$  458.0928, found 458.0935; HPLC analysis: retention time = 7.63 min, peak area 95.2%, 80:20  $\text{CH}_3\text{CN}/\text{H}_2\text{O}$ .

*(E)*-6-(Naphthalen-2-yl)imidazo[2,1-*b*]oxazole-5-carbaldehyde

*O*-(4-(trifluoromethyl)benzyl) oxime (**26**)

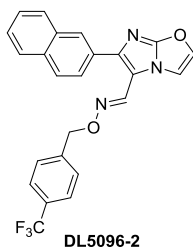

Yield 33%,  $^1\text{H}$  NMR (400 MHz,  $\text{CDCl}_3$ ):  $\delta$  8.53 (s, 1H), 8.10 (s, 1H), 7.92-7.80 (m, 4H), 7.65 (d,  $J = 8.0$  Hz, 2H), 7.60 (s, 1H), 7.54-7.50 (m, 4H), 7.43 (s, 1H), 5.25 (s, 2H);  $^{13}\text{C}$  NMR (100 MHz,  $\text{CDCl}_3$ ):  $\delta$  156.3, 147.2, 141.6, 140.3, 137.8, 133.3, 133.0, 131.0, 130.1 ( $J = 32.7$  Hz), 128.5, 128.3, 128.2, 127.7, 127.2, 126.5, 125.8, 125.5, 125.4, 124.1 ( $J = 270.8$  Hz), 113.9, 111.9, 75.5; HRMS (ESI): Exact mass calcd for  $\text{C}_{24}\text{H}_{17}\text{F}_3\text{N}_3\text{O}_2$   $[\text{M}+\text{H}]^+$  436.1273, found 436.1264; HPLC analysis: retention time = 7.23 min, peak area 96.5%, 80:20  $\text{CH}_3\text{CN}/\text{H}_2\text{O}$ .

*(E)*-6-(Naphthalen-2-yl)imidazo[2,1-*b*]oxazole-5-carbaldehyde *O*-(4-methoxybenzyl) oxime (**27**)

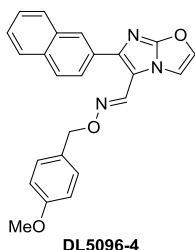

Yield 33%, <sup>1</sup>H NMR (400 MHz, CDCl<sub>3</sub>): δ 8.50 (s, 1H), 8.10 (s, 1H), 7.90-7.80 (m, 4H), 7.70 (s, 1H), 7.52-7.37 (m, 5H), 6.93 (d, *J* = 8.4 Hz, 2H), 5.14 (s, 2H), 3.82 (s, 3H); <sup>13</sup>C NMR (100 MHz, CDCl<sub>3</sub>): δ 159.6, 156.2, 146.6, 139.7, 137.7, 133.3, 133.0, 131.1, 130.2, 129.3, 128.4, 128.3, 127.7, 127.1, 126.4, 126.3, 125.8, 114.0, 113.9, 112.3, 76.4, 55.3; HRMS (ESI): Exact mass calcd for C<sub>24</sub>H<sub>20</sub>N<sub>3</sub>O<sub>3</sub> [M+H]<sup>+</sup> 398.1504, found 398.1514; HPLC analysis: retention time = 4.36 min, peak area 95.1%, 80:20 CH<sub>3</sub>CN/H<sub>2</sub>O.

*(E)*-6-(Naphthalen-2-yl)imidazo[2,1-*b*]oxazole-5-carbaldehyde *O*-(4-(*tert*-butyl)benzyl) oxime (**28**)

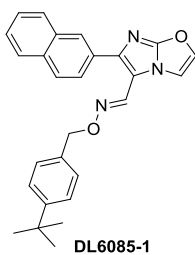

Yield 31%, <sup>1</sup>H NMR (400 MHz, CDCl<sub>3</sub>): δ 8.52 (s, 1H), 8.10 (s, 1H), 7.90-7.80 (m, 4H), 7.70 (s, 1H), 7.51-7.38 (m, 7H), 5.19 (s, 2H); <sup>13</sup>C NMR (100 MHz, CDCl<sub>3</sub>): δ 156.2, 151.2, 146.6, 139.7, 137.7, 134.2, 133.3, 133.0, 131.1, 128.4, 128.3, 127.7, 127.1, 126.41, 126.36, 125.8, 125.5, 114.0, 112.3, 75.5, 34.6, 31.3; HRMS (ESI): Exact mass calcd for C<sub>27</sub>H<sub>26</sub>N<sub>3</sub>O<sub>2</sub> [M+H]<sup>+</sup> 424.2025, found 424.2018; HPLC analysis: retention time = 13.39 min, peak area 98.3%, 80:20 CH<sub>3</sub>CN/H<sub>2</sub>O.

*(E)*-6-(Naphthalen-2-yl)imidazo[2,1-*b*]oxazole-5-carbaldehyde *O*-(4-phenoxybenzyl) oxime (**29**)

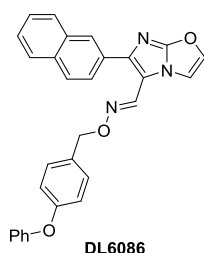

Yield 38%,  $^1\text{H}$  NMR (400 MHz,  $\text{CDCl}_3$ ):  $\delta$  8.52 (s, 1H), 8.11 (s, 1H), 7.91-7.81 (m, 4H), 7.70 (s, 1H), 7.51 (t,  $J = 4.0$  Hz, 2H), 7.43 (t,  $J = 4.4$  Hz, 3H), 7.35 (t,  $J = 8.0$  Hz, 2H), 7.13 (t,  $J = 8.0$  Hz, 1H), 7.04 (t,  $J = 8.8$  Hz, 4H), 5.18 (s, 2H);  $^{13}\text{C}$  NMR (100 MHz,  $\text{CDCl}_3$ ):  $\delta$  157.3, 156.9, 156.2, 146.7, 139.9, 137.8, 133.3, 133.0, 132.0, 131.1, 130.3, 129.8, 128.5, 128.3, 127.7, 127.1, 126.5, 126.4, 125.8, 123.5, 119.1, 118.7, 114.0, 112.2, 76.2; HRMS (ESI): Exact mass calcd for  $\text{C}_{29}\text{H}_{22}\text{N}_3\text{O}_3$   $[\text{M}+\text{H}]^+$  460.1661, found 460.1659; HPLC analysis: retention time = 8.30 min, peak area 96.3%, 80:20  $\text{CH}_3\text{CN}/\text{H}_2\text{O}$ .

#### 4. CAR Agonist Luciferase Reporter Gene Assay

HepG2-CYP2B6-hCAR<sup>4</sup> cells were cultured in DMEM (Invitrogen, Carlsbad, CA) supplemented with 5  $\mu\text{g}/\text{mL}$  blasticidin (Invitrogen), 0.5 mg/mL geneticin (Invitrogen), 10% Hyclone™ FBS (GE Healthcare Life Sciences, Logan, UT), and 100 U/mL penicillin and 100  $\mu\text{g}/\text{mL}$  streptomycin (Invitrogen). For the assay, the HepG2-CYP2B6-hCAR cells were dispensed at 2,500 cells/4  $\mu\text{L}/\text{well}$  in tissue culture-treated 1536-well white assay plates (Greiner Bio-One North America, Monroe, NC) using a Thermo Scientific Multidrop Combi (Thermo Fisher Scientific Inc., Waltham, MA). The media used for plating was DMEM supplemented with 10% Hyclone™ FBS and 100 U/mL penicillin and 100  $\mu\text{g}/\text{mL}$  streptomycin. After the assay plates were incubated at 37°C/5%  $\text{CO}_2$  for 5 h, 23 nL of compounds dissolved in dimethyl sulfoxide (DMSO), CITCO (Sigma-Aldrich Corp., St. Louis, MO), or



DMSO were transferred to the assay plates by a Wako Pintool station (Wako Automation, San Diego, CA). One  $\mu\text{L}$  of PK11195 (Sigma-Aldrich Corp.) was added (final concentration of  $0.75 \mu\text{M}$  PK11195) using a Flying Reagent Dispenser (FRD, Aurora Discovery, Carlsbad, CA). The final test compound concentrations in the  $5 \mu\text{L}$  assay volume ranged from  $6.41 \text{ pM}$  to  $92 \mu\text{M}$  in 16 different concentrations at a 1:3 dilution. The final concentration of DMSO (used for the negative control) was 0.46%. The plate format of the positive control is as follows: Column 1: concentration-response titration of CITCO from  $2.81 \text{ nM}$  to  $92 \mu\text{M}$  at a 1:2 dilution with DMSO; Column 2 top half:  $60 \mu\text{M}$  of CITCO; Column 2 bottom half:  $48 \mu\text{M}$  of CITCO; Column 3 top half and Column 4: DMSO only; Column 3 bottom half:  $92 \mu\text{M}$  of tetraoctyl ammonium bromide. After 23 h of incubation at  $37 \text{ }^\circ\text{C}/5\% \text{ CO}_2$ , One  $\mu\text{L}$  of CellTiter-Fluor™ (Promega, Madison, WI) was added, using the FRD, after which, all plates were put back into the incubator at  $37 \text{ }^\circ\text{C}/5\% \text{ CO}_2$  for another hour. The fluorescence intensity was then measured at  $540 \text{ nm}$  following excitation at  $405 \text{ nm}$  using a ViewLux plate reader (Perkin Elmer, Shelton, CT) to determine cell viability. Immediately after,  $4 \mu\text{L}$  of ONE-Glo™ Luciferase reagent (Promega) was added to each well using the FRD and a 30 min incubation at room temperature occurred. Luminescence intensity was then measured using the ViewLux plate reader and data was expressed in relative luminescence units.

## 5. Cell Viability Assay<sup>4</sup>

The potential cytotoxicity of the compounds in HepG2-CYP2B6-hCAR cells was measured using a luciferase-coupled ATP quantitation assay (CellTiter-Glo viability assay, Promega). The change of intracellular ATP content indicates the number of metabolically competent cells. The cells were seeded at  $2,500 \text{ cells}/5 \mu\text{L}$  in 1536-well plates and were exposed to each test compound at concentrations and treatment duration as previously mentioned. The assay plates were incubated for 24 h at  $37 \text{ }^\circ\text{C}$ , followed by the addition of  $4 \mu\text{L}/\text{well}$  of CellTiter-Glo reagent. After 30 min incubation at RT, the luminescence intensity of the plates was measured using a ViewLux plate

reader.

## 6. Experimental protocol for hPXR agonist HTS

HepG2-CYP3A4-hPXR cells were cultured in EMEM medium (ATCC, Manassas, VA) supplemented with 10% FBS (ThermoFisher Scientific, Waltham, MA), 100 U/mL of penicillin and 100 mg/mL of streptomycin (ThermoFisher Scientific), and 500 µg/mL geneticin (ThermoFisher Scientific) in collagen coated flasks (Corning Inc., Corning, NY). Cells were dispensed at 3,000 cells/well/5 µL in 1,536-well plates (Greiner Bio-One North America, Monroe, NC) using a Multidrop Combi (Thermo Fisher Scientific) in assay media which entailed phenol red free DMEM (ThermoFisher Scientific) supplemented with 5% charcoal/dextran treated FBS (Invitrogen, Carlsbad, CA), 1 mM sodium pyruvate (Invitrogen), 2 mM L-Glutamine (Invitrogen), and 100 U/mL of penicillin and 100 mg/mL of streptomycin (ThermoFisher Scientific). The assay plates were incubated at 37 °C/5% CO<sub>2</sub> for 5 hrs before 23 nL of each compound was transferred from the compound plate to the assay plate via a pin tool station (Kalypsys, San Diego, CA). After 23 hrs of incubation at 37°C/5% CO<sub>2</sub>, 1 µL of CellTiter Fluor (Promega, Madison, WI) is added to each well for determination of cell viability. Plates were placed back in the incubator at 37 °C/5% CO<sub>2</sub> for another hour. Fluorescence intensity was then measured at 540 nm emission following excitation at 405 nm using a ViewLux plate reader (Perkin Elmer, Shelton, CT). Four µl of the ONE-Glo luciferase reagent (Promega) was then added followed by a 30 min incubation at room temperature. Finally, luminescence intensity was quantified using the ViewLux plate reader and data was expressed in relative luminescence units.

## 7. Culture and Treatment of HPH

Human primary Hepatocytes obtained from BioIVT (Baltimore, MD) were seeded at  $0.75 \times 10^6$  cells/well in 12-well biocoat plate and cultured in sandwich format as

described previously<sup>5</sup> for 36 h before treatment with solvent (0.1% DMSO), PB (1 mM), RIF (10  $\mu$ M), CITCO, compounds **18** and **19** (0.5, 1, 5  $\mu$ M) for 24 h and 72 h before harvesting cells to detect RNA and protein, respectively.

## 8. Real-Time PCR Analysis

Total RNA from hepatocytes were isolated and reverse transcribed as described previously.<sup>6</sup> Real-Time PCR assay was performed on an ABI StepOnePlus Real-Time PCR system with SYBR Green PCR master mix from Qiagen (Germantown, MD). The primer sequences for CYP2B6, CYP3A4 and glyceraldehyde-3-phosphate dehydrogenase (GAPDH) are as follows: CYP2B6, 5'-AGACGCCTTCAATCCTGACC-3' and 5'-CCTTCACCAAGACAAATCCGC-3'; CYP3A4, 5'-GTGGGGCTTTTATGATGGTCA-3' and 5'-GCCTCAGATTTCTCACCAACACA-3'; GAPDH, 5'-CCCATCACCATCTTCCAGGAG-3' and 5'-GTTGTCATGGATGACCTTGGC-3'. Induction values were calculated according to the previous description.<sup>6</sup>

## 9. Western Blot Analysis

20  $\mu$ g of cell homogenate proteins from hepatocytes were resolved on NuPAGE<sup>TM</sup> 4-12% Bis-Tris gels (Life Technologies) and electrophoretically transferred onto polyvinylidene fluoride membranes. Membranes were incubated with antibodies against CYP2B6 (Abcam), CYP3A4 (Millipore), or  $\beta$ -actin (Sigma-Aldrich), diluted at 1:500, 1:5000 and 1:5000, respectively at 4 °C overnight, followed by incubation with horseradish peroxidase secondary antibodies for 1 h at room temperature. Blots were developed with West Pico chemiluminescent substrates (ThermoFisher).

10. Table S1 Original Data of Activity and Cytotoxicity for Cpd1-29

| Cpd               | Structure                                                                           | All Curve                                                                           | EC <sub>50</sub> Curve                                                              | EC <sub>50</sub> (μM) <sup>a</sup> | E <sub>max</sub> | Cytotoxicity Curve                                                                    |
|-------------------|-------------------------------------------------------------------------------------|-------------------------------------------------------------------------------------|-------------------------------------------------------------------------------------|------------------------------------|------------------|---------------------------------------------------------------------------------------|
| <b>1</b><br>CITCO | 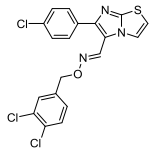   |    |    | 0.62 ± 0.11                        | 2.8              |    |
| <b>2</b>          |    |    |    | 0.58 ± 0.36                        | 2.3              |    |
| <b>3</b>          |    |    |    | 0.67 ± 0.10                        | 2.6              |    |
| <b>4</b>          |   |   |   | 0.48 ± 0.22                        | 2.4              |   |
| <b>5</b>          |  |  |  | 0.48 ± 0.23                        | 2.7              |  |
| <b>6</b>          |  |  |  | 0.88 ± 0.09                        | 2.3              |  |
| <b>7</b>          |  |  |  | 0.49 ± 0.27                        | 2.4              |  |
| <b>8</b>          |  |  |  | 0.59 ± 0.13                        | 3.0              |  |
| <b>9</b>          |  |  |  | 2.4 ± 0.30                         | 2.0              |  |

|           |  |  |  |                 |     |  |
|-----------|--|--|--|-----------------|-----|--|
| <b>10</b> |  |  |  | $3.4 \pm 0.29$  | 2.2 |  |
| <b>11</b> |  |  |  | >100            | 2.3 |  |
| <b>12</b> |  |  |  | NC              | 1.1 |  |
| <b>13</b> |  |  |  | NC              | 1.2 |  |
| <b>14</b> |  |  |  | $1.1 \pm 0.08$  | 2.3 |  |
| <b>15</b> |  |  |  | $0.38 \pm 0.31$ | 2.3 |  |
| <b>16</b> |  |  |  | $0.94 \pm 0.73$ | 2.2 |  |
| <b>17</b> |  |  |  | $2.6 \pm 0.16$  | 3.6 |  |
| <b>18</b> |  |  |  | $0.41 \pm 0.09$ | 4.2 |  |
| <b>19</b> |  |  |  | $0.37 \pm 0.11$ | 3.8 |  |
| <b>20</b> |  |  |  | $1.5 \pm 0.12$  | 3.5 |  |

|    |  |  |  |                 |     |  |
|----|--|--|--|-----------------|-----|--|
| 21 |  |  |  | $1.1 \pm 0.11$  | 3.8 |  |
| 22 |  |  |  | $0.99 \pm 0.15$ | 4.2 |  |
| 23 |  |  |  | $0.84 \pm 0.10$ | 4.4 |  |
| 24 |  |  |  | $0.98 \pm 0.11$ | 3.7 |  |
| 25 |  |  |  | $1.7 \pm 0.13$  | 3.1 |  |
| 26 |  |  |  | $0.47 \pm 0.18$ | 2.8 |  |
| 27 |  |  |  | $4.4 \pm 0.44$  | 3.3 |  |
| 28 |  |  |  | $7.9 \pm 0.48$  | 2.3 |  |
| 29 |  |  |  | NC              | 1   |  |

<sup>a</sup>EC<sub>50</sub> and E<sub>max</sub> values were calculated by nonlinear regression. Data are presented as mean  $\pm$  SEM of at least three independent experiments in quadruplicate. NC (if the maximum concentration produced no effect).

# 11. <sup>1</sup>H, <sup>13</sup>C NMR and HPLC Spectra of Compounds 1-29

## Compound 1

DL5045H  
DL5045H

8.390  
7.995  
7.984  
7.601  
7.581  
7.514  
7.509  
7.460  
7.437  
7.415  
7.264  
7.255  
7.250  
7.234  
7.229  
6.927  
6.916  
5.135

1.664

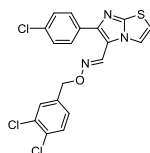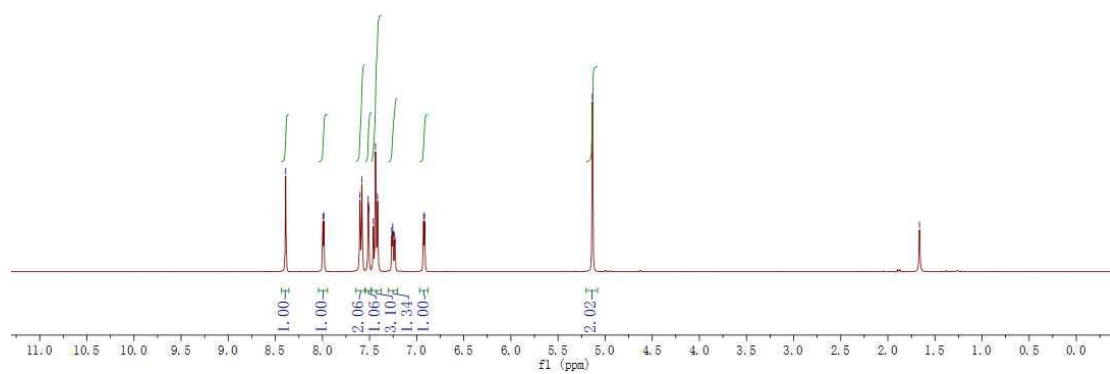

DL5045C  
DL5045C

152.66  
149.24  
139.87  
137.73  
134.47  
133.58  
132.05  
131.87  
130.50  
130.09  
128.53  
128.97  
127.37  
121.53  
115.67  
112.99  
77.32  
77.00  
76.68  
74.94

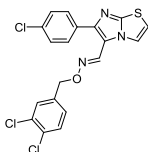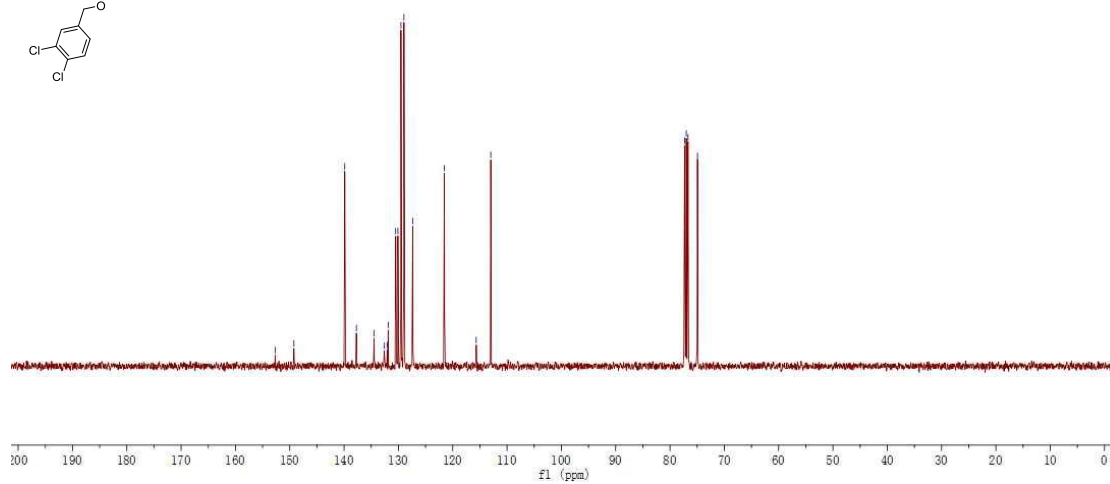

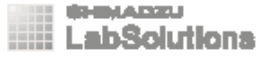

# Analysis Report

## <Sample Information>

Sample Name : 5045  
 Sample ID : 0.8/80  
 Data Filename : 7222.lcd  
 Method Filename : DL single run.lcm  
 Batch Filename :  
 Vial # : 1-4  
 Injection Volume : 10 uL  
 Date Acquired : 7/20/2018 5:22:53 PM  
 Date Processed : 7/20/2018 5:43:20 PM  
 Sample Type : Unknown  
 Acquired by : System Administrator  
 Processed by : System Administrator

## <Chromatogram>

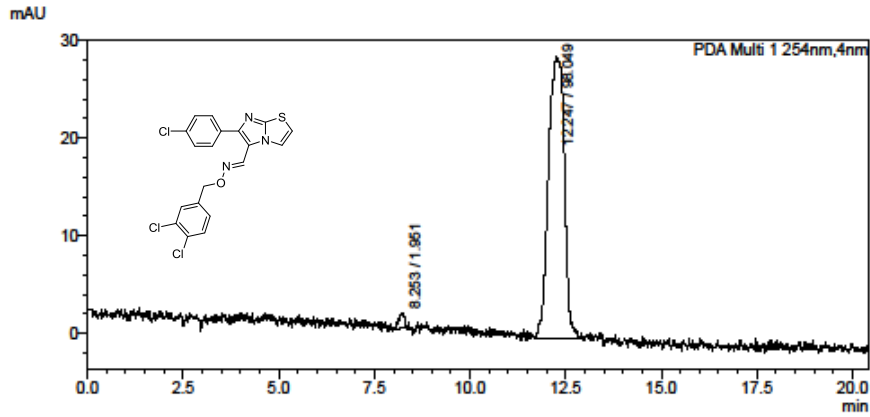

## <Peak Table>

| Peak# | Ret. Time | Area   | Height | Conc. | Unit | Mark | Area%   |
|-------|-----------|--------|--------|-------|------|------|---------|
| 1     | 8.253     | 16465  | 1649   | 0.000 |      | M    | 1.951   |
| 2     | 12.247    | 827308 | 28833  | 0.000 |      | M    | 98.049  |
| Total |           | 843770 | 30483  |       |      |      | 100.000 |

C:\Users\sopl\Desktop\Xue Lab\Liang\7222.lcd



# Compound 2

DL5058H  
DL5058H

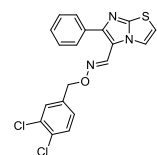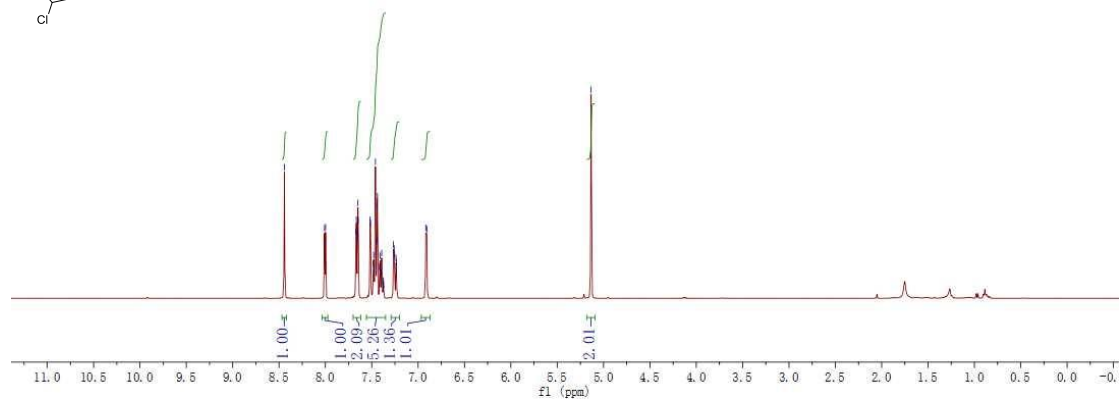

DL5058C  
DL5058C

152.56  
150.60  
140.31  
137.84  
133.33  
132.55  
131.99  
130.48  
130.07  
128.75  
128.42  
128.39  
127.26  
121.57  
118.54  
112.76  
77.33  
77.01  
76.69  
74.87

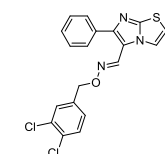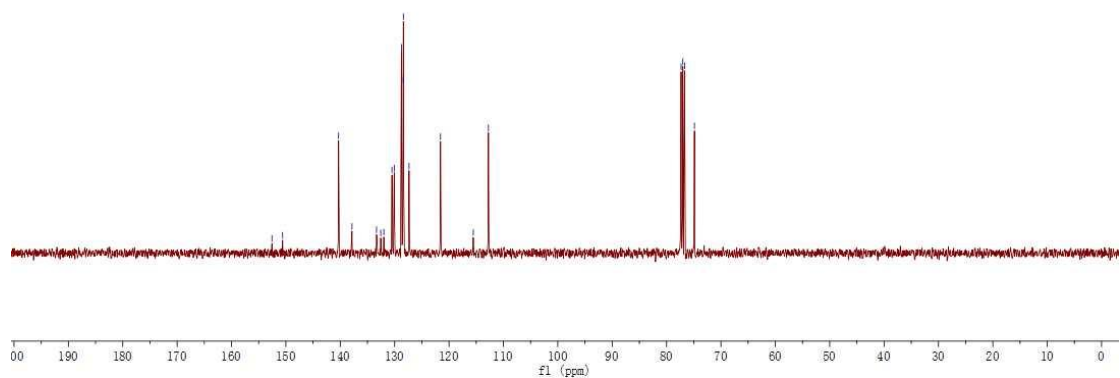

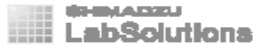

# Analysis Report

## <Sample Information>

Sample Name : 5058  
 Sample ID : 0.8/80  
 Data Filename : 7223.lcd  
 Method Filename : DL single run.lcm  
 Batch Filename :  
 Vial # : 1-4  
 Injection Volume : 10 uL  
 Date Acquired : 7/20/2018 5:44:13 PM  
 Date Processed : 7/20/2018 6:15:37 PM  
 Sample Type : Unknown  
 Acquired by : System Administrator  
 Processed by : System Administrator

## <Chromatogram>

mAU

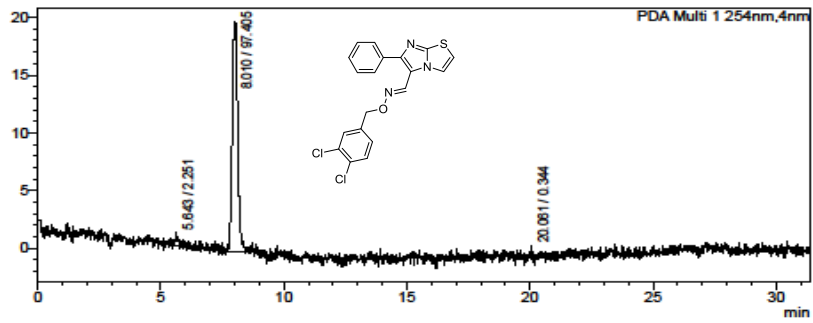

## <Peak Table>

PDA Ch1 254nm

| Peak# | Ret. Time | Area   | Height | Conc. | Unit | Mark | Area%   |
|-------|-----------|--------|--------|-------|------|------|---------|
| 1     | 5.643     | 7035   | 1181   | 0.000 |      | M    | 2.251   |
| 2     | 8.010     | 304362 | 19860  | 0.000 |      | M    | 97.405  |
| 3     | 20.061    | 1074   | 960    | 0.000 |      | M    | 0.344   |
| Total |           | 312470 | 22021  |       |      |      | 100.000 |

C:\Users\sop\Desktop\Xue Lab\Liang\7223.lcd

# Compound 3

DL5067H  
DL5067H

8.378  
8.373  
8.369  
7.985  
7.984  
7.977  
7.972  
7.642  
7.637  
7.629  
7.621  
7.613  
7.607  
7.601  
7.514  
7.508  
7.504  
7.490  
7.485  
7.485  
7.435  
7.438  
7.423  
7.286  
7.283  
7.248  
7.243  
7.233  
7.228  
7.223  
7.218  
7.167  
7.162  
7.157  
7.146  
7.140  
7.136  
7.129  
7.124  
7.118  
7.114  
6.919  
6.908  
6.900  
6.894  
6.894  
15.121

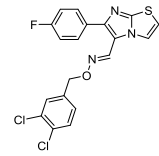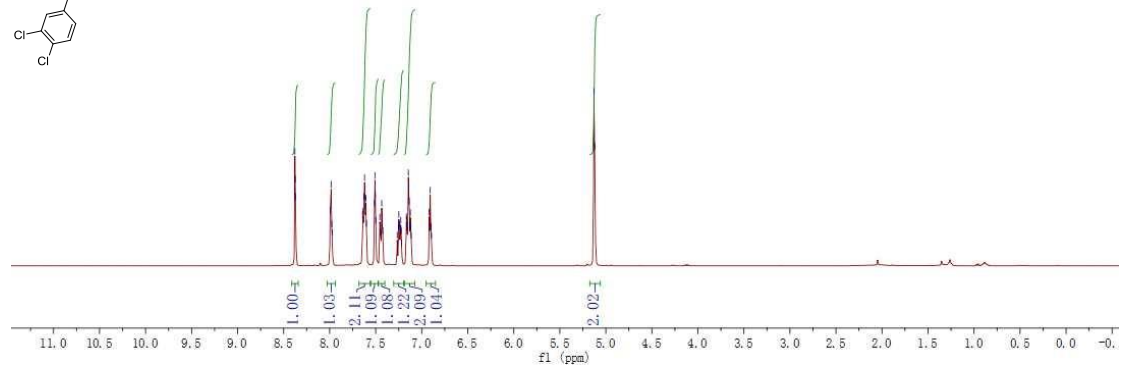

DL5067C  
DL5067C

164.13  
161.66  
152.54  
149.52  
139.95  
137.77  
132.55  
132.02  
130.48  
130.13  
130.08  
130.04  
129.51  
127.37  
121.53  
115.90  
115.68  
115.44  
112.85  
77.34  
77.02  
76.71  
74.90

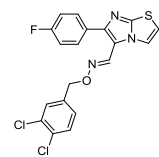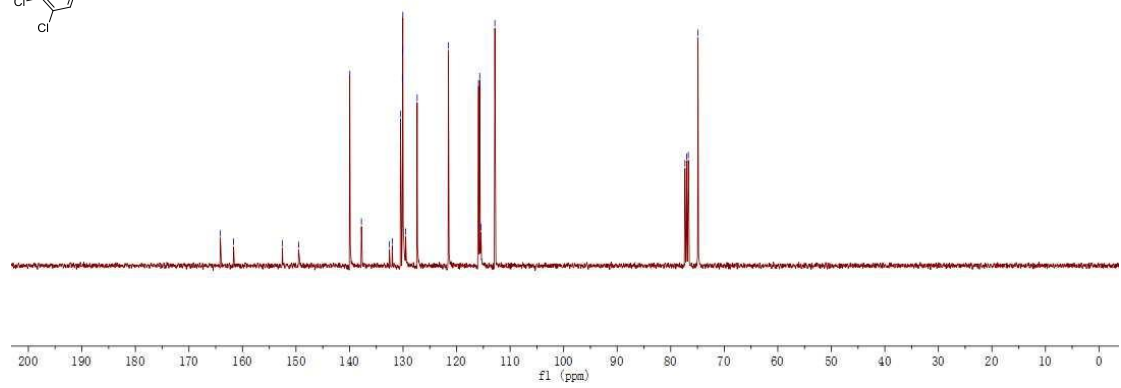

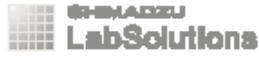

# Analysis Report

## <Sample Information>

Sample Name : 5067  
 Sample ID : 0.8/80  
 Data Filename : 7191.lcd  
 Method Filename : DL single run.lcm  
 Batch Filename :  
 Vial # : 1-4  
 Injection Volume : 10 uL  
 Date Acquired : 7/18/2018 4:53:54 PM  
 Date Processed : 7/18/2018 5:14:39 PM  
 Sample Type : Unknown  
 Acquired by : System Administrator  
 Processed by : System Administrator

## <Chromatogram>

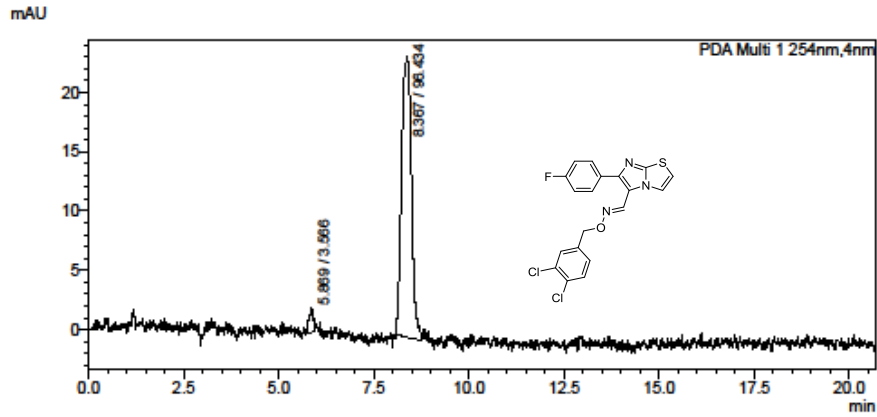

## <Peak Table>

| Peak# | Ret. Time | Area   | Height | Conc. | Unit | Mark | Area%   |
|-------|-----------|--------|--------|-------|------|------|---------|
| 1     | 5.869     | 15680  | 2015   | 0.000 |      | M    | 3.566   |
| 2     | 8.367     | 424045 | 23634  | 0.000 |      | M    | 96.434  |
| Total |           | 439725 | 25648  |       |      |      | 100.000 |

C:\Users\sopl\Desktop\Xue Lab\Liang\7191.lcd

# Compound 4

DL5064H  
DL5064H

8.386  
7.992  
7.981  
7.590  
7.570  
7.533  
7.512  
7.459  
7.438  
7.267  
7.252  
7.231  
6.929  
6.918  
-5.133

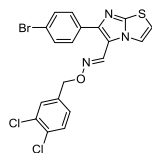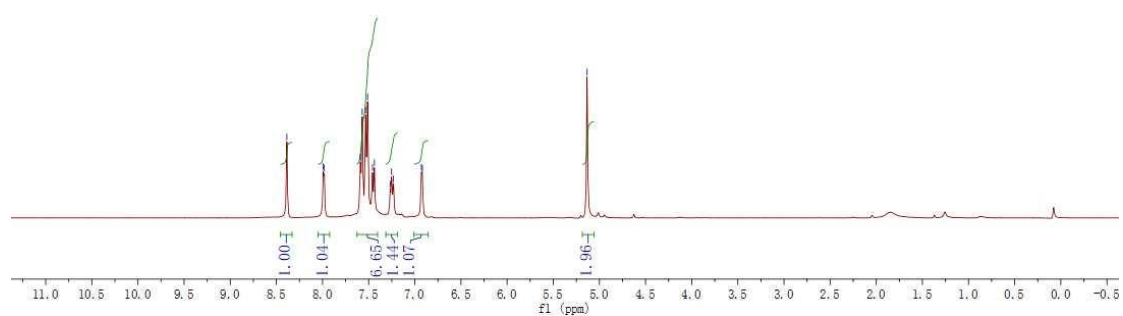

DL5064C  
DL5064C

152.67  
149.22  
139.85  
137.73  
132.31  
131.92  
130.98  
129.79  
127.37  
122.70  
121.53  
115.68  
113.03  
77.33  
77.01  
76.70  
74.94

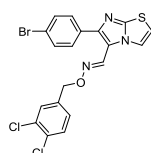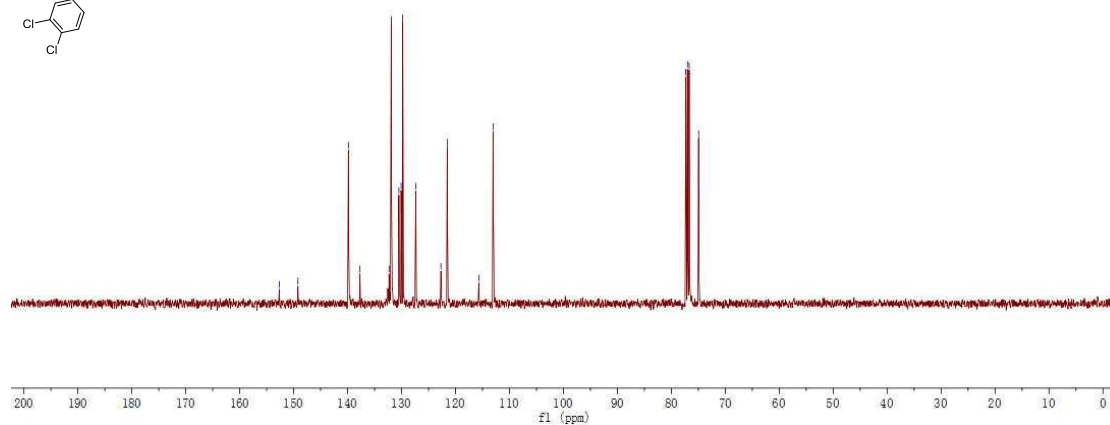

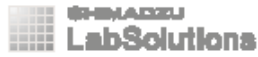

# Analysis Report

## <Sample Information>

Sample Name : 5064  
 Sample ID : 0.8/60  
 Data Filename : 7232.lcd  
 Method Filename : DL single run.lcm  
 Batch Filename :  
 Vial # : 1-4  
 Injection Volume : 10 uL  
 Date Acquired : 7/22/2018 4:29:10 PM  
 Date Processed : 7/22/2018 4:49:17 PM

Sample Type : Unknown  
 Acquired by : System Administrator  
 Processed by : System Administrator

## <Chromatogram>

mAU

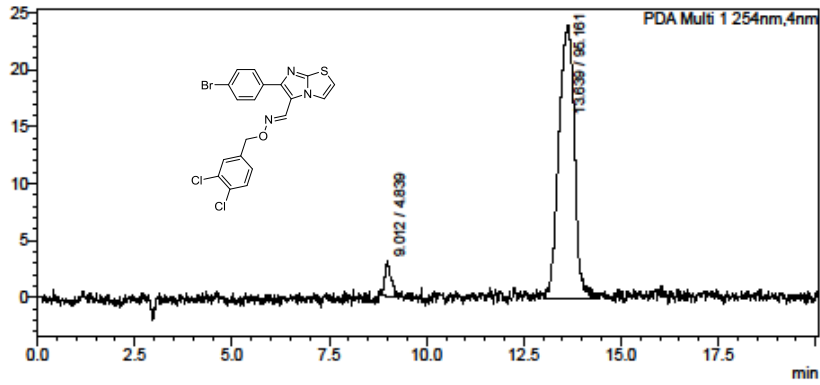

## <Peak Table>

PDA Ch1 254nm

| Peak# | Ret. Time | Area   | Height | Conc. | Unit | Mark | Area%   |
|-------|-----------|--------|--------|-------|------|------|---------|
| 1     | 9.012     | 34300  | 3091   | 0.000 |      | M    | 4.839   |
| 2     | 13.639    | 674544 | 23998  | 0.000 |      | M    | 95.161  |
| Total |           | 708843 | 27089  |       |      |      | 100.000 |

C:\Users\sop\Desktop\Xue Lab\Liang\7232.lcd

# Compound 5

DL5068H  
DL5068H

8.433  
7.997  
7.986  
7.560  
7.540  
7.515  
7.510  
7.457  
7.436  
7.275  
7.266  
7.258  
7.251  
7.231  
6.897  
6.886  
5.128  
2.405

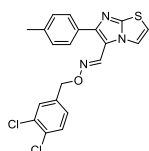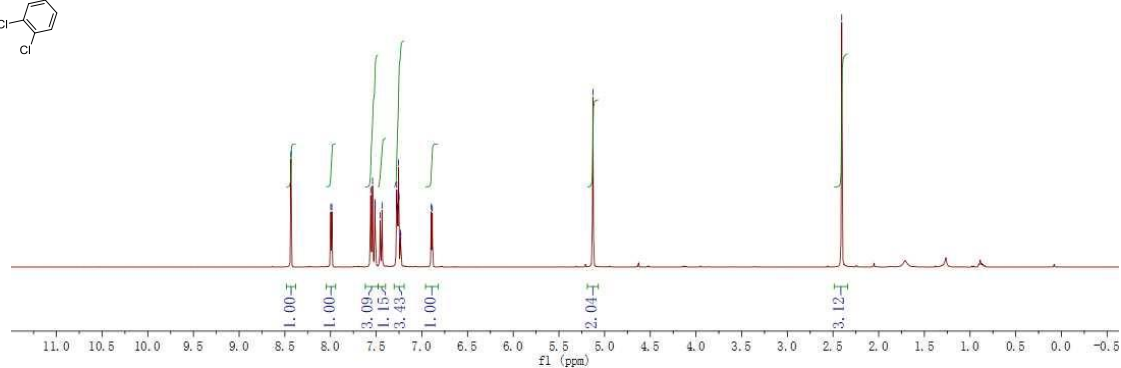

DL5068C  
DL5068C

152.51  
150.79  
140.43  
138.39  
137.90  
132.54  
131.96  
130.47  
130.05  
129.46  
128.25  
127.34  
121.57  
115.29  
112.55  
77.32  
77.01  
76.69  
74.82  
21.29

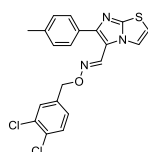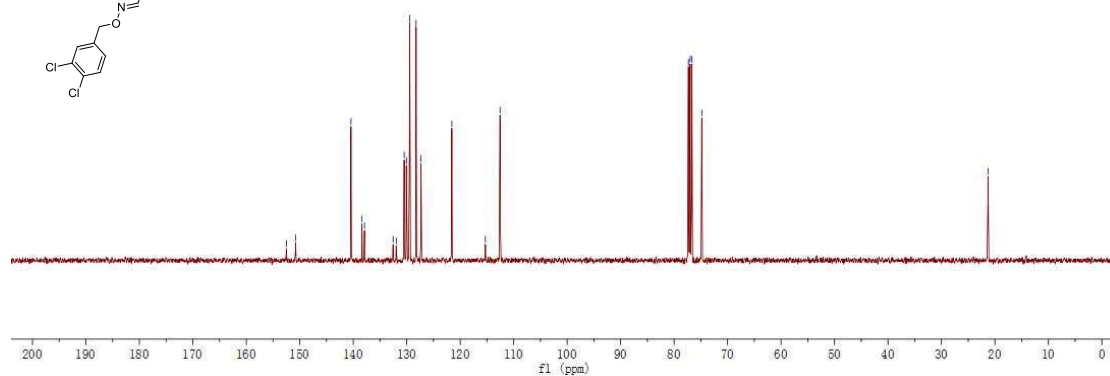

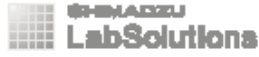

# Analysis Report

## <Sample Information>

Sample Name : 5068  
 Sample ID : 0.8/80  
 Data Filename : 7211.lcd  
 Method Filename : DL single run.lcm  
 Batch Filename :  
 Vial # : 1-4  
 Injection Volume : 10 uL  
 Date Acquired : 7/20/2018 12:20:47 PM  
 Date Processed : 7/20/2018 12:40:59 PM  
 Sample Type : Unknown  
 Acquired by : System Administrator  
 Processed by : System Administrator

## <Chromatogram>

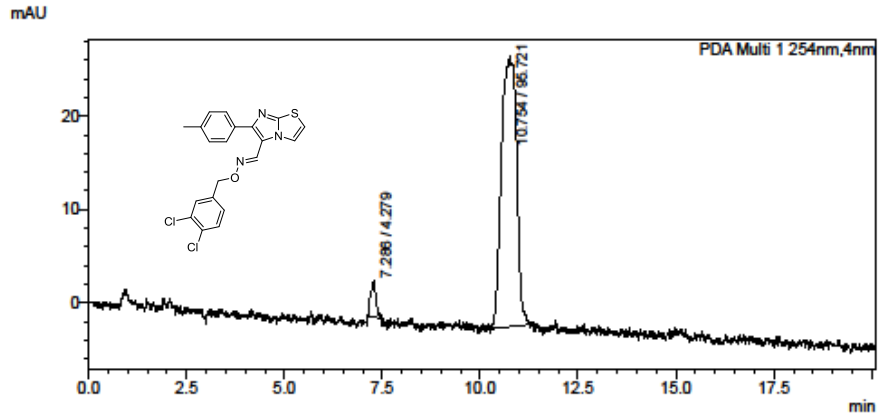

## <Peak Table>

| PDA Ch1 254nm |           |        |        |       |      |      |         |
|---------------|-----------|--------|--------|-------|------|------|---------|
| Peak#         | Ret. Time | Area   | Height | Conc. | Unit | Mark | Area%   |
| 1             | 7.286     | 34692  | 3800   | 0.000 |      | M    | 4.279   |
| 2             | 10.754    | 776045 | 28942  | 0.000 |      | M    | 95.721  |
| Total         |           | 810736 | 32742  |       |      |      | 100.000 |

C:\Users\sop\Desktop\Xue Lab\Liang\7211.lcd



# Compound 6

DL5063H  
DL5063H

8.422  
8.010  
7.999  
7.788  
7.768  
7.716  
7.695  
7.516  
7.511  
7.459  
7.439  
7.266  
7.256  
7.251  
7.235  
7.230  
6.952  
6.941  
5.145

1.765

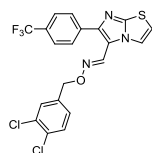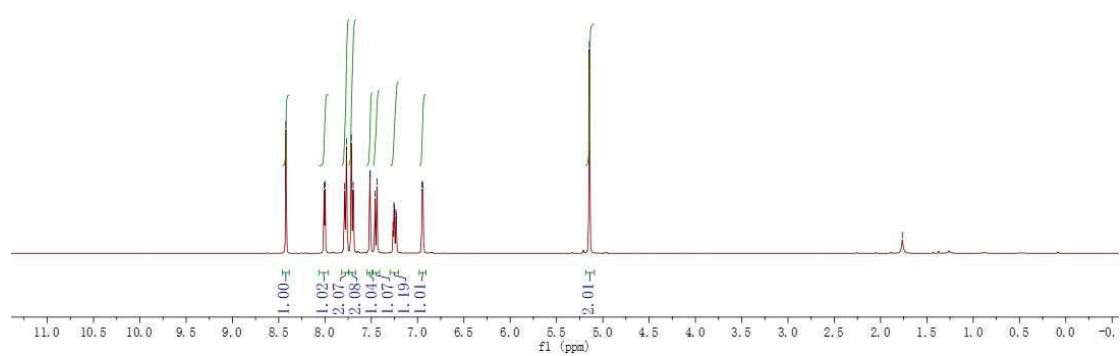

DL5063C  
DL5063C

152.81  
148.65  
139.66  
137.66  
136.88  
132.59  
132.09  
130.51  
130.33  
130.09  
128.76  
128.50  
127.97  
125.73  
125.70  
123.66  
123.62  
123.40  
122.70  
121.53  
116.27  
113.36  
77.33  
77.01  
76.70  
75.01

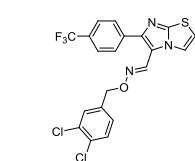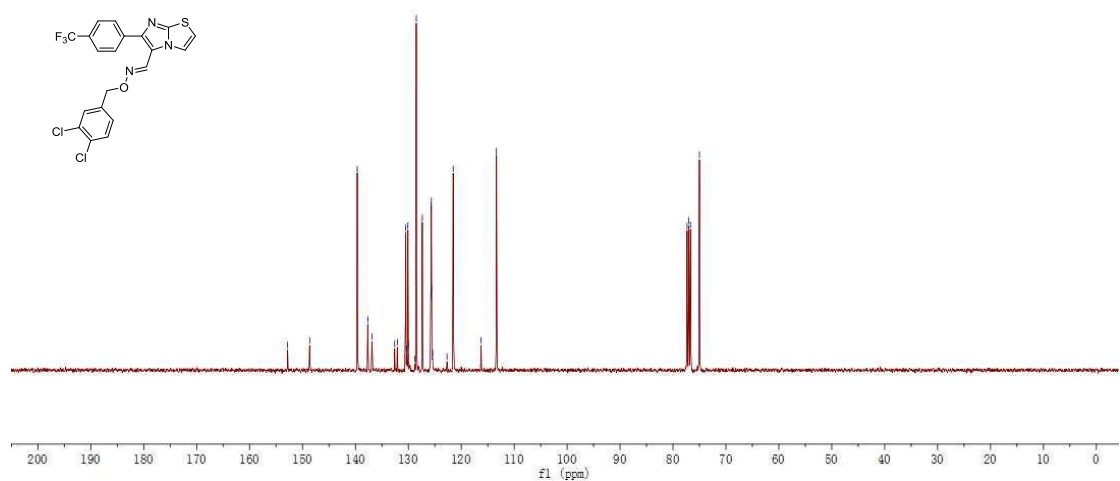

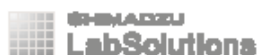

# Analysis Report

## <Sample Information>

Sample Name : 5083  
 Sample ID : 0.8/80  
 Data Filename : 7278.lcd  
 Method Filename : DL single run.lcm  
 Batch Filename :  
 Vial # : 1-4  
 Injection Volume : 5 uL  
 Date Acquired : 7/26/2018 2:08:25 PM  
 Date Processed : 7/26/2018 2:28:33 PM

Sample Type : Unknown  
 Acquired by : System Administrator  
 Processed by : System Administrator

## <Chromatogram>

mAU

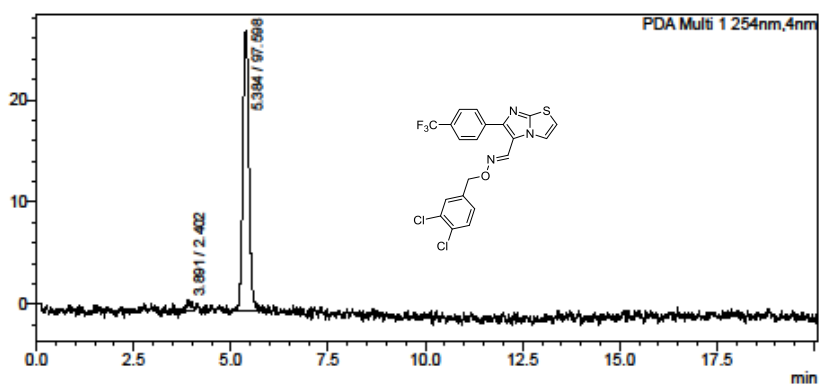

## <Peak Table>

PDA Ch1 254nm

| Peak# | Ret. Time | Area   | Height | Conc. | Unit | Mark | Area%   |
|-------|-----------|--------|--------|-------|------|------|---------|
| 1     | 3.891     | 7371   | 1054   | 0.000 |      | M    | 2.402   |
| 2     | 5.384     | 299456 | 27386  | 0.000 |      | M    | 97.598  |
| Total |           | 306828 | 28440  |       |      |      | 100.000 |

C:\Users\sop\Desktop\Xue Lab\Liang\7278.lcd

# Compound 7

DL5069H  
DL5069H

8.405  
7.980  
7.969  
7.999  
7.578  
7.506  
7.446  
7.426  
7.288  
7.246  
7.225  
6.993  
6.972  
6.876  
6.865  
5.115  
3.848

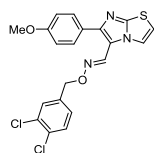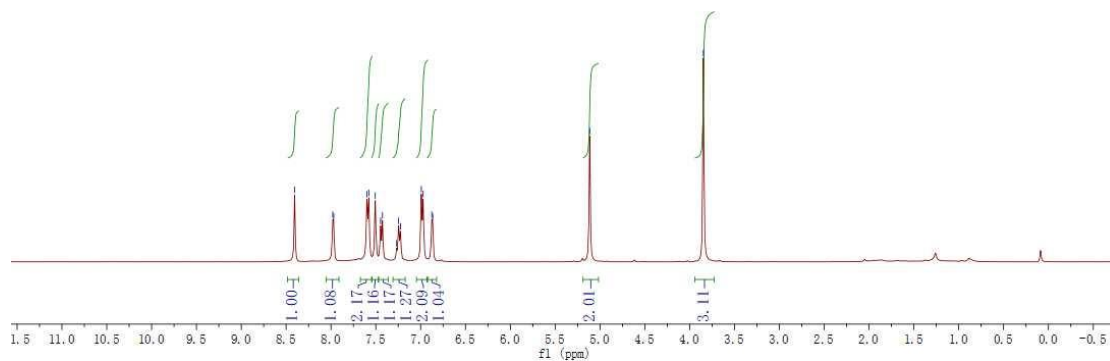

DL5069C  
DL5069C

159.87  
152.46  
150.57  
140.37  
137.91  
132.52  
131.93  
130.46  
130.05  
129.62  
127.35  
125.95  
121.56  
114.96  
114.20  
113.06  
112.41  
77.36  
77.04  
76.73  
74.80  
55.33

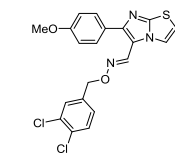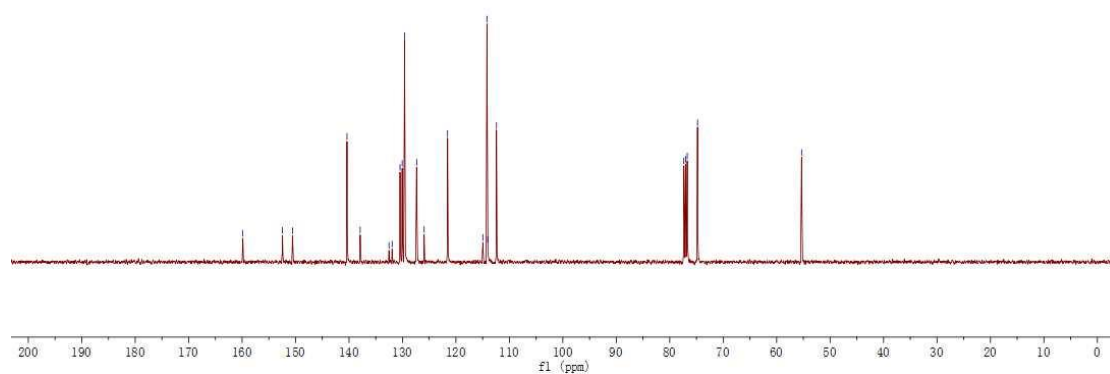

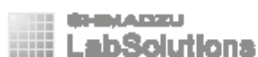

# Analysis Report

## <Sample Information>

Sample Name : 5089  
 Sample ID : 0.8/80  
 Data Filename : 7238.lcd  
 Method Filename : DL single run.lcm  
 Batch Filename :  
 Vial # : 1-4  
 Injection Volume : 10 uL  
 Date Acquired : 7/23/2018 3:34:23 PM  
 Date Processed : 7/23/2018 3:55:45 PM

Sample Type : Unknown  
 Acquired by : System Administrator  
 Processed by : System Administrator

## <Chromatogram>

mAU

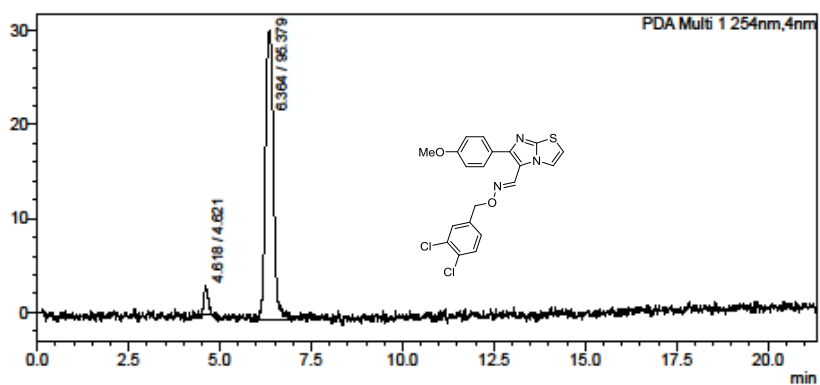

## <Peak Table>

PDA Ch1 254nm

| Peak# | Ret. Time | Area   | Height | Conc. | Unit | Mark | Area%   |
|-------|-----------|--------|--------|-------|------|------|---------|
| 1     | 4.618     | 22992  | 3025   | 0.000 |      | M    | 4.621   |
| 2     | 6.364     | 474545 | 30701  | 0.000 |      | M    | 95.379  |
| Total |           | 497537 | 33726  |       |      |      | 100.000 |

C:\Users\sopl\Desktop\Xue Lab\Liang\7238.lcd

# Compound 8

DL5132-1H  
DL5132-1H

8.440  
7.982  
7.982  
7.587  
7.587  
7.511  
7.511  
7.506  
7.482  
7.431  
7.322  
7.264  
7.251  
7.246  
7.230  
7.225  
16.885  
5.123

2.986  
2.968  
2.951  
2.934  
2.916

1.289  
1.271  
1.259  
1.205  
0.884

0.085

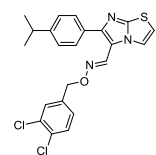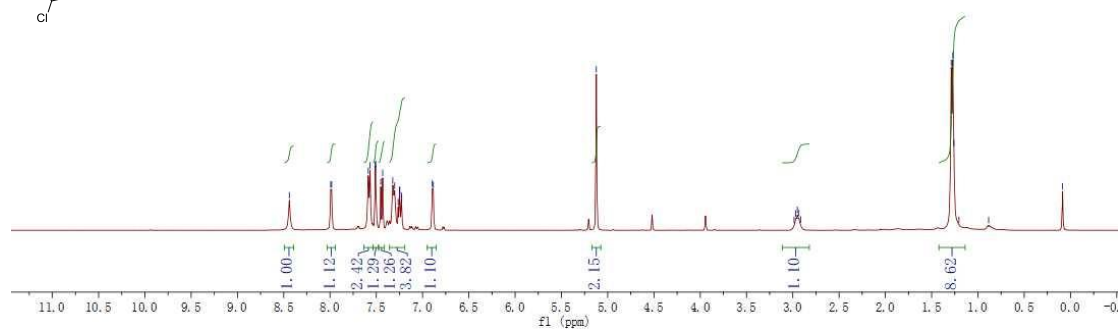

DL5132-1C  
DL5132-1C

152.52  
149.33  
140.46  
137.90  
132.53  
131.95  
130.47  
130.23  
130.05  
128.78  
128.39  
127.35  
126.84  
126.55  
115.31  
112.59

77.35  
77.03  
76.72  
74.82

33.93  
23.92

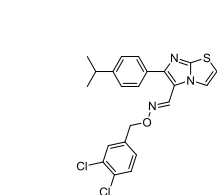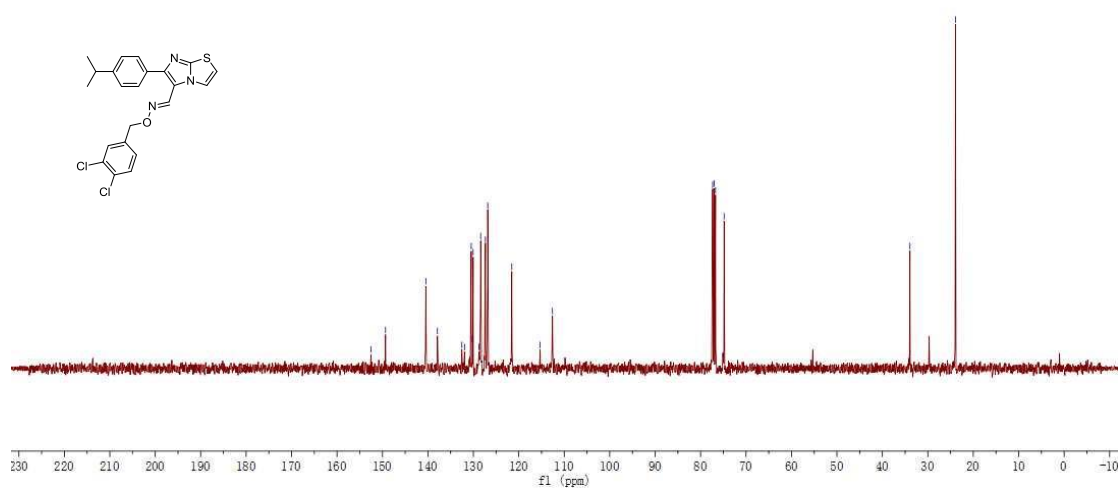

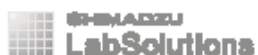

# Analysis Report

## <Sample Information>

Sample Name : 6132  
 Sample ID : 0.8/80  
 Data Filename : 7275.lcd  
 Method Filename : DL single run.lcm  
 Batch Filename :  
 Vial # : 1-4  
 Injection Volume : 5 uL  
 Date Acquired : 7/26/2018 12:48:37 PM  
 Date Processed : 7/26/2018 1:13:42 PM

Sample Type : Unknown  
 Acquired by : System Administrator  
 Processed by : System Administrator

## <Chromatogram>

mAU

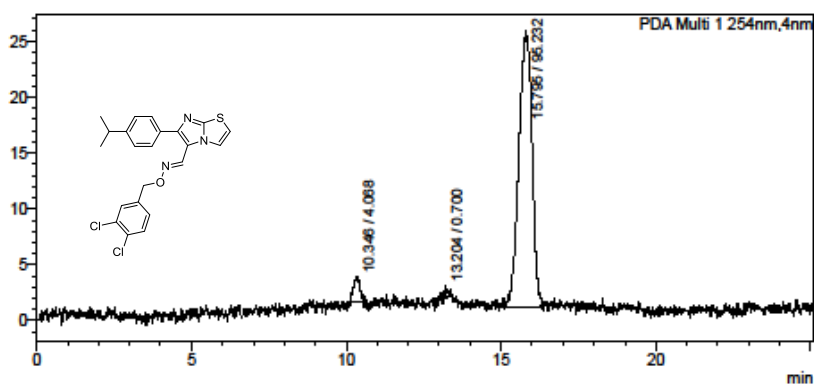

## <Peak Table>

PDA Ch1 254nm

| Peak# | Ret. Time | Area   | Height | Conc. | Unit | Mark | Area%   |
|-------|-----------|--------|--------|-------|------|------|---------|
| 1     | 10.346    | 31402  | 2272   | 0.000 |      | M    | 4.068   |
| 2     | 13.204    | 5407   | 1146   | 0.000 |      | M    | 0.700   |
| 3     | 15.795    | 735171 | 24649  | 0.000 |      | M    | 95.232  |
| Total |           | 771980 | 28068  |       |      |      | 100.000 |

C:\Users\isop\Desktop\Xue Lab\Liang\7275.lcd

# Compound 9

DL5059H  
DL5059H

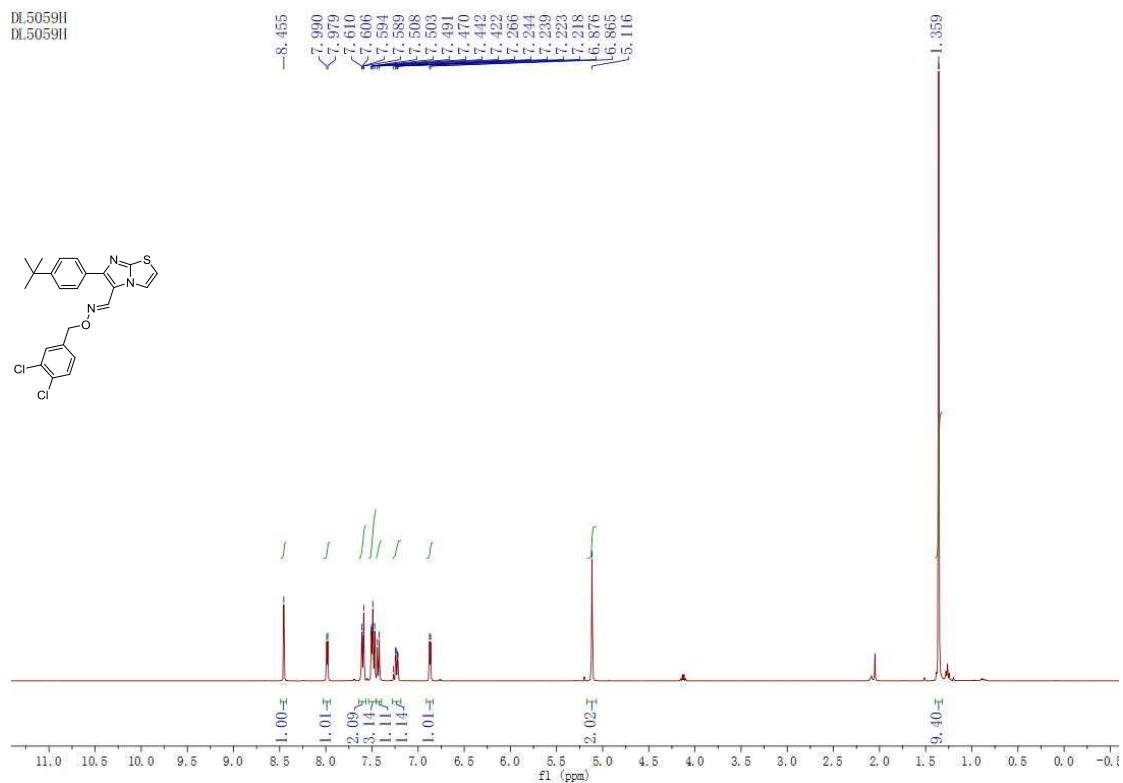

DL5059C  
DL5059C

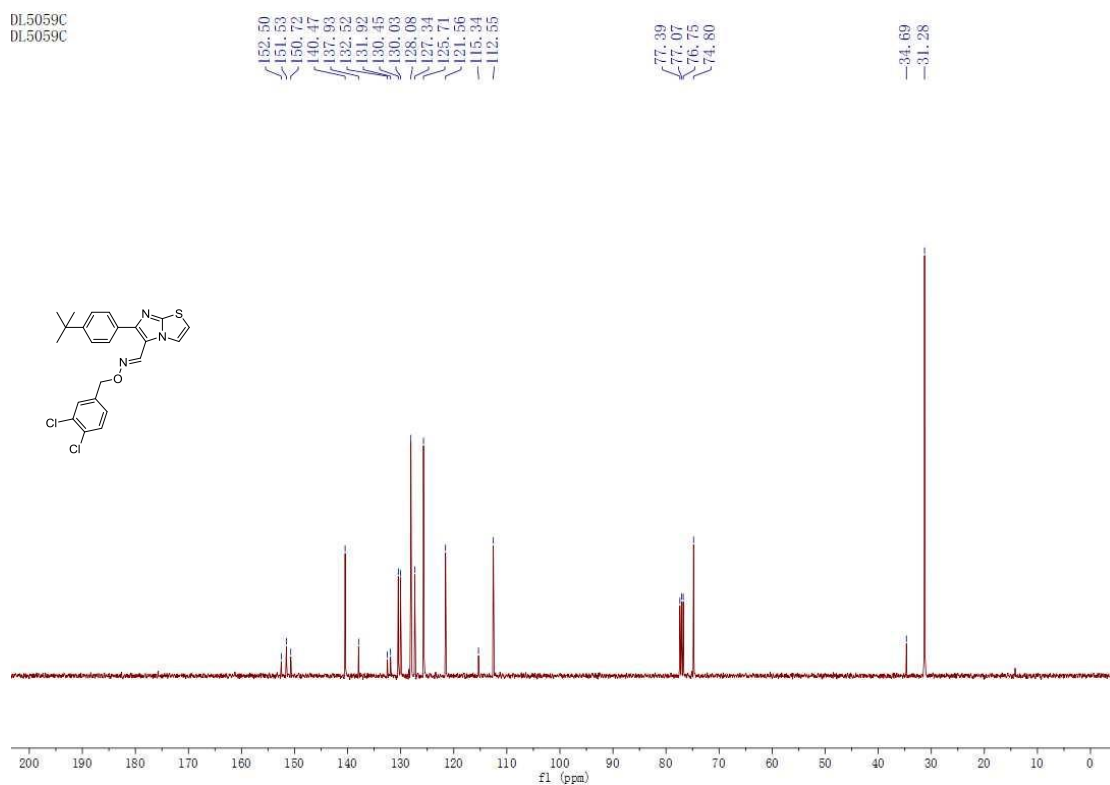

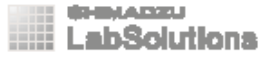

# Analysis Report

## <Sample Information>

Sample Name : 5059  
 Sample ID : 0.8/80  
 Data Filename : 7284.lcd  
 Method Filename : DL single run.lcm  
 Batch Filename :  
 Vial # : 1-4  
 Injection Volume : 10 uL  
 Date Acquired : 7/26/2018 9:48:13 PM  
 Date Processed : 7/26/2018 10:18:32 PM

Sample Type : Unknown  
 Acquired by : System Administrator  
 Processed by : System Administrator

## <Chromatogram>

mAU

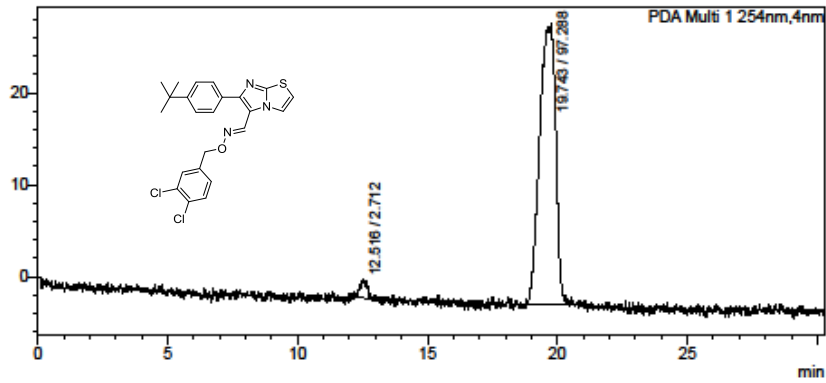

## <Peak Table>

PDA Ch1 254nm

| Peak# | Ret. Time | Area    | Height | Conc. | Unit | Mark | Area%   |
|-------|-----------|---------|--------|-------|------|------|---------|
| 1     | 12.516    | 38708   | 2080   | 0.000 |      | M    | 2.712   |
| 2     | 19.743    | 1316959 | 30590  | 0.000 |      | M    | 97.288  |
| Total |           | 1353666 | 32670  |       |      |      | 100.000 |

C:\Users\sop\Desktop\Xue Lab\Liang\7284.lcd



# Compound 10

DL5061H  
DL5061H

8.435  
8.407  
8.002  
7.991  
7.775  
7.754  
7.725  
7.708  
7.704  
7.510  
7.506  
7.456  
7.436  
7.268  
7.253  
7.248  
7.232  
7.227  
6.971  
6.960  
5.148

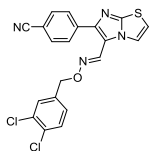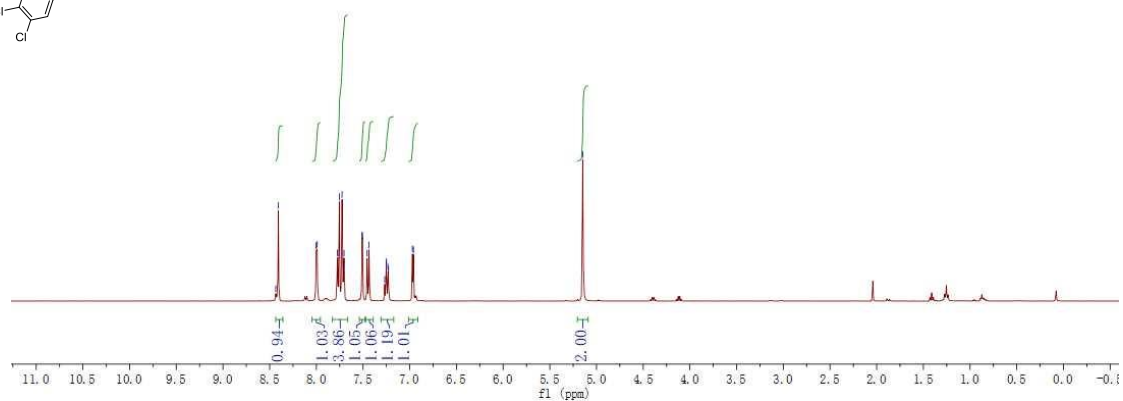

DL5061C  
DL5061C

152.97  
147.82  
137.86  
137.55  
132.49  
132.14  
130.53  
129.95  
128.64  
128.08  
127.41  
121.53  
118.68  
116.72  
113.72  
111.67  
77.37  
77.05  
76.73  
75.10

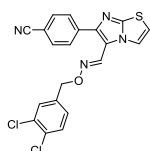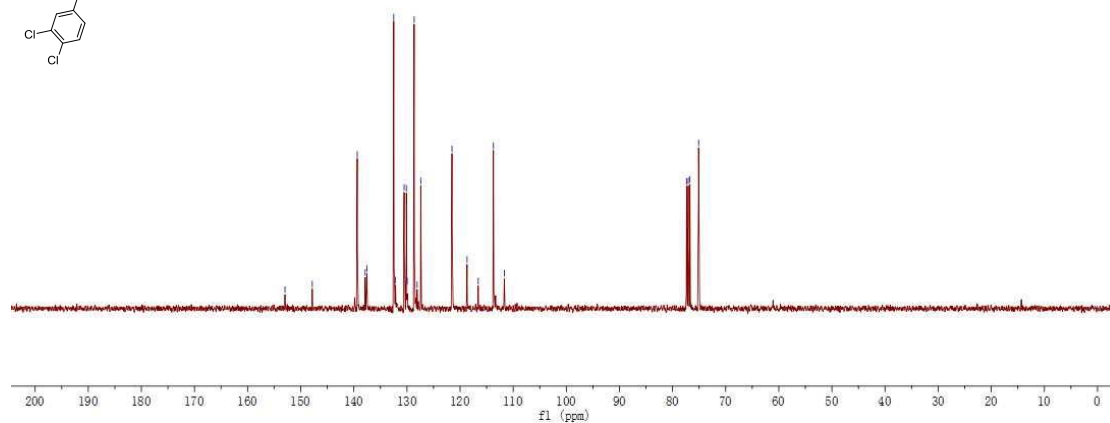

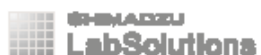

# Analysis Report

## <Sample Information>

Sample Name : 5081  
 Sample ID : 0.8/80  
 Data Filename : 7224.lcd  
 Method Filename : DL single run.lcm  
 Batch Filename :  
 Vial # : 1-4  
 Injection Volume : 10 uL  
 Date Acquired : 7/22/2018 12:47:35 PM  
 Date Processed : 7/22/2018 1:10:54 PM

Sample Type : Unknown  
 Acquired by : System Administrator  
 Processed by : System Administrator

## <Chromatogram>

mAU

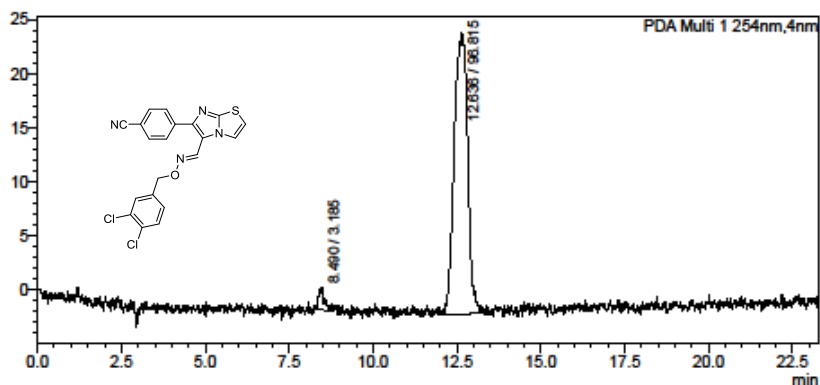

## <Peak Table>

PDA Ch1 254nm

| Peak# | Ret. Time | Area   | Height | Conc. | Unit | Mark | Area%   |
|-------|-----------|--------|--------|-------|------|------|---------|
| 1     | 8.490     | 23888  | 2069   | 0.000 |      | M    | 3.185   |
| 2     | 12.636    | 726170 | 25982  | 0.000 |      | M    | 96.815  |
| Total |           | 750058 | 28052  |       |      |      | 100.000 |

C:\Users\sop\Desktop\Xue Lab\Liang\7224.lcd

# Compound 11

DL5131-1H  
DL5131-1H

8.446  
7.988  
7.977  
7.587  
7.571  
7.566  
7.508  
7.503  
7.446  
7.425  
7.303  
7.283  
7.264  
7.247  
7.242  
7.226  
7.221  
6.878  
6.867  
5.116  
2.575  
2.567  
2.554  
2.546  
2.539  
2.525  
2.517  
2.509  
1.917  
1.890  
1.872  
1.865  
1.852  
1.843  
1.782  
1.775  
1.746  
1.467  
1.461  
1.439  
1.418  
1.412  
1.390  
1.382  
1.358  
1.289  
1.281  
1.273  
1.260  
1.244

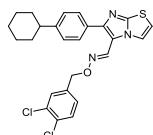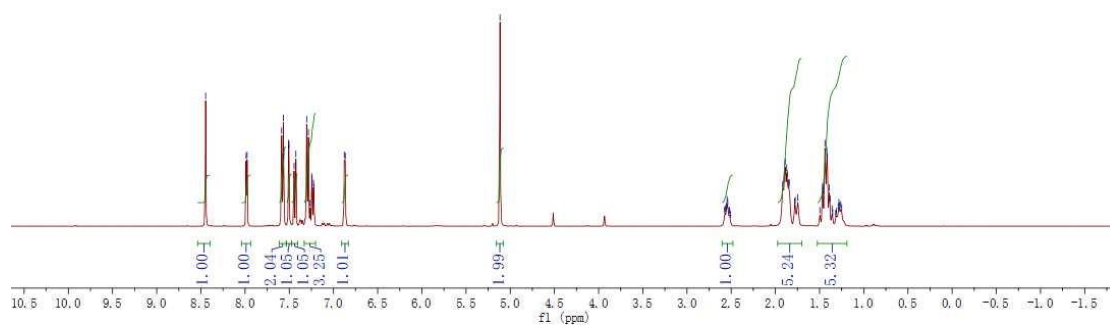

DL5131-1C  
DL5131-1C

152.49  
150.84  
148.52  
140.49  
137.92  
132.52  
131.93  
130.86  
130.46  
130.22  
130.04  
128.31  
128.16  
127.35  
127.25  
121.57  
115.27  
112.53  
77.37  
77.05  
76.74  
74.80  
44.35  
34.34  
26.84  
26.11

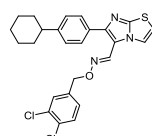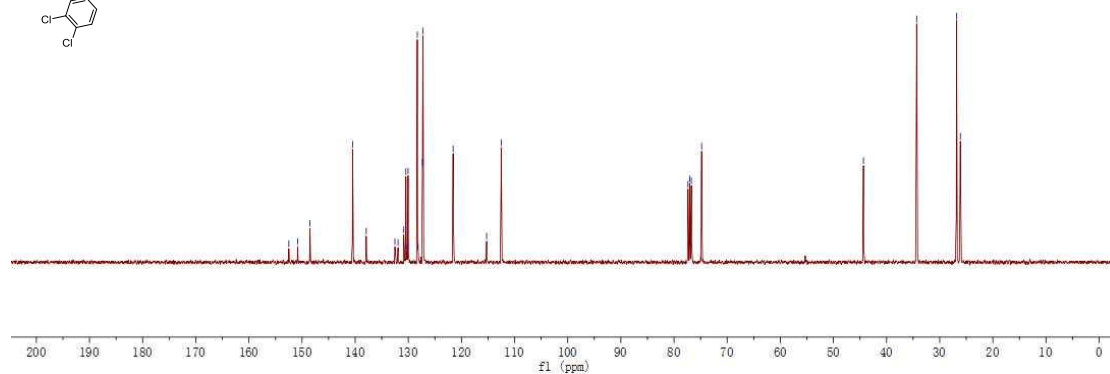

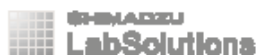

# Analysis Report

## <Sample Information>

Sample Name : 5131-1  
 Sample ID : 0.8/80  
 Data Filename : 7228.lcd  
 Method Filename : DL single run.lcm  
 Batch Filename :  
 Vial # : 1-4  
 Injection Volume : 10 uL  
 Date Acquired : 7/22/2018 2:19:27 PM  
 Date Processed : 7/22/2018 3:13:44 PM

Sample Type : Unknown  
 Acquired by : System Administrator  
 Processed by : System Administrator

## <Chromatogram>

MAU

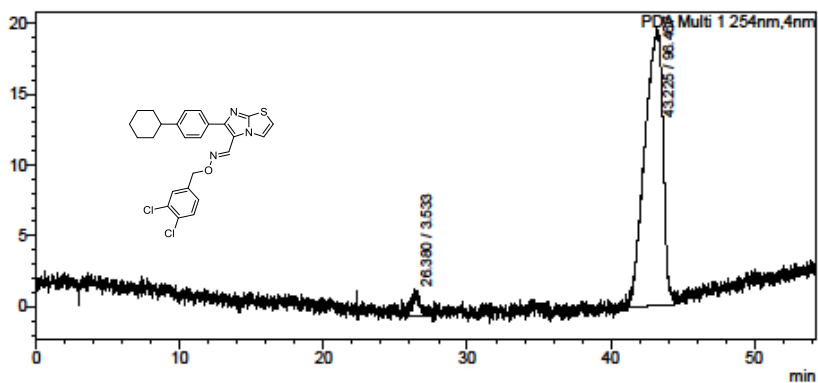

## <Peak Table>

PDA Ch1 254nm

| Peak# | Ret. Time | Area    | Height | Conc. | Unit | Mark | Area%   |
|-------|-----------|---------|--------|-------|------|------|---------|
| 1     | 26.380    | 63131   | 1815   | 0.000 |      | M    | 3.533   |
| 2     | 43.225    | 1723798 | 19506  | 0.000 |      | M    | 96.467  |
| Total |           | 1786929 | 21321  |       |      |      | 100.000 |

C:\Users\isop\Desktop\Xue Lab\Liang\7228.lcd

# Compound 12

DL5060H  
DL5060H

8.502  
8.012  
8.001  
7.760  
7.740  
7.707  
7.687  
7.658  
7.639  
7.528  
7.488  
7.469  
7.463  
7.450  
7.442  
7.324  
7.325  
7.387  
7.265  
7.243  
6.907  
6.896  
5.141

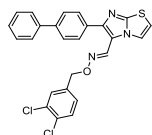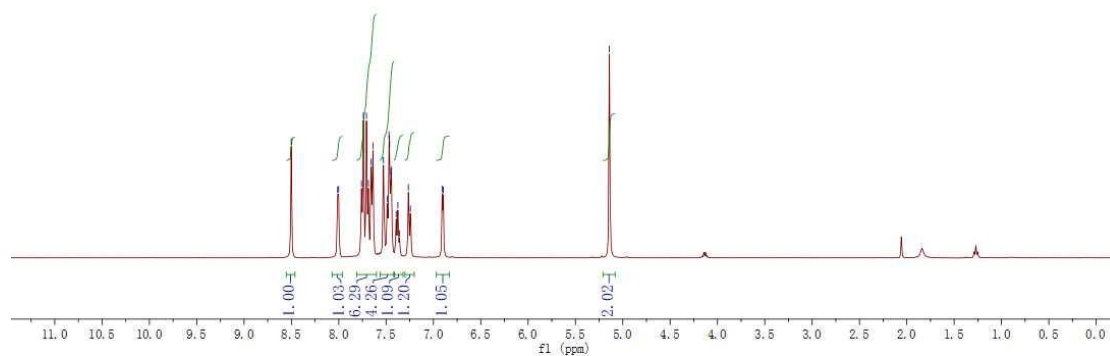

DL5060C  
DL5060C

152.66  
150.19  
141.12  
140.39  
140.28  
137.86  
132.56  
132.33  
132.00  
130.50  
130.08  
128.84  
128.73  
127.55  
127.43  
127.38  
127.04  
121.59  
115.63  
112.78  
77.37  
77.05  
76.73  
74.89

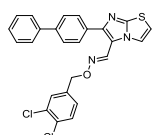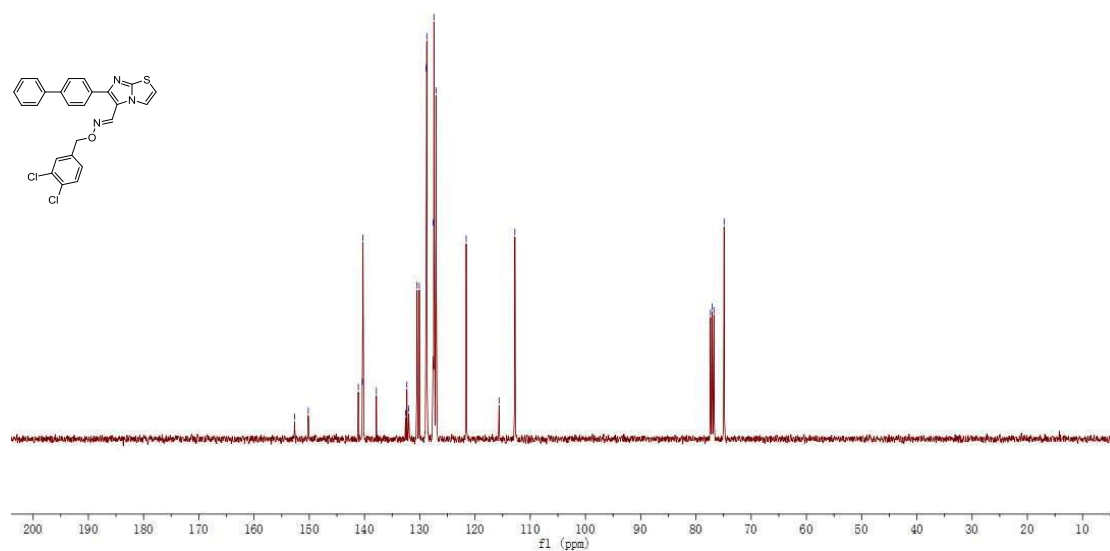

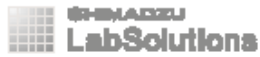

# Analysis Report

## <Sample Information>

|                  |                        |              |                        |
|------------------|------------------------|--------------|------------------------|
| Sample Name      | : 5080                 | Sample Type  | : Unknown              |
| Sample ID        | : 0.8/80               | Acquired by  | : System Administrator |
| Data Filename    | : 7229.lcd             | Processed by | : System Administrator |
| Method Filename  | : DL single run.lcm    |              |                        |
| Batch Filename   | :                      |              |                        |
| Vial #           | : 1-4                  |              |                        |
| Injection Volume | : 10 uL                |              |                        |
| Date Acquired    | : 7/22/2018 3:14:54 PM |              |                        |
| Date Processed   | : 7/22/2018 3:45:03 PM |              |                        |

## <Chromatogram>

mAU

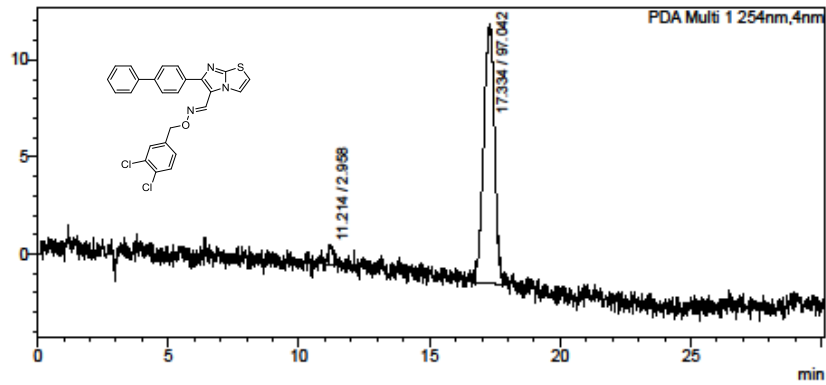

## <Peak Table>

PDA Ch1 254nm

| Peak# | Ret. Time | Area   | Height | Conc. | Unit | Mark | Area%   |
|-------|-----------|--------|--------|-------|------|------|---------|
| 1     | 11.214    | 11845  | 1034   | 0.000 |      | M    | 2.958   |
| 2     | 17.334    | 388588 | 13365  | 0.000 |      | M    | 97.042  |
| Total |           | 400433 | 14399  |       |      |      | 100.000 |

C:\Users\sopl\Desktop\Xue Lab\Liang\7229.lcd

# Compound 13

DL5126H  
DL5126H

8.429  
8.423  
7.985  
7.984  
7.608  
7.510  
7.505  
7.453  
7.432  
7.395  
7.374  
7.367  
7.363  
7.344  
7.264  
7.252  
7.247  
7.231  
7.226  
6.889  
6.879  
6.874  
5.127

1.720  
1.352  
1.346  
1.315  
1.269

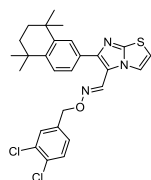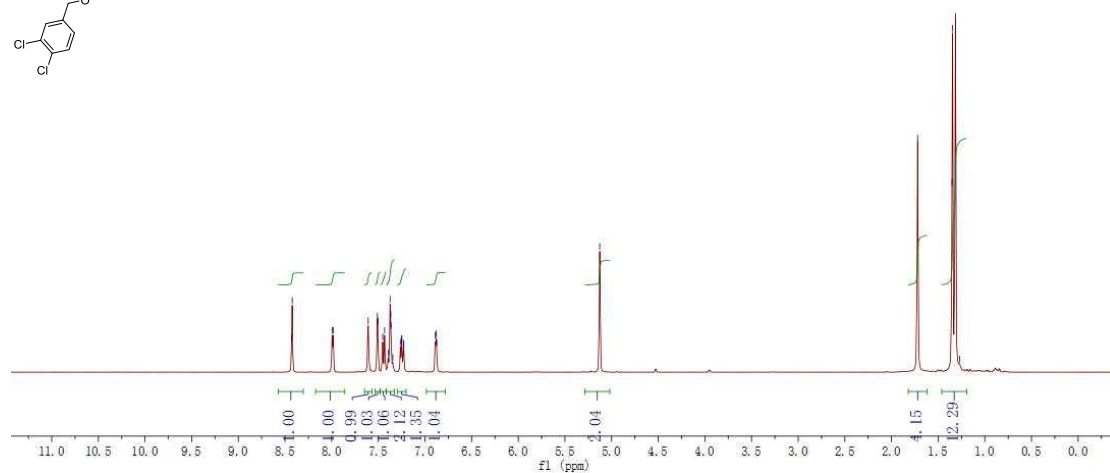

DL5126C  
DL5126C

152.46  
151.26  
145.38  
140.64  
138.07  
132.51  
131.88  
130.44  
130.00  
127.29  
126.94  
126.62  
125.63  
121.55  
115.31  
112.46

77.32  
77.00  
76.69  
74.74

35.06  
34.94  
34.35  
34.26  
31.88  
31.80

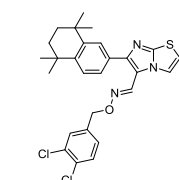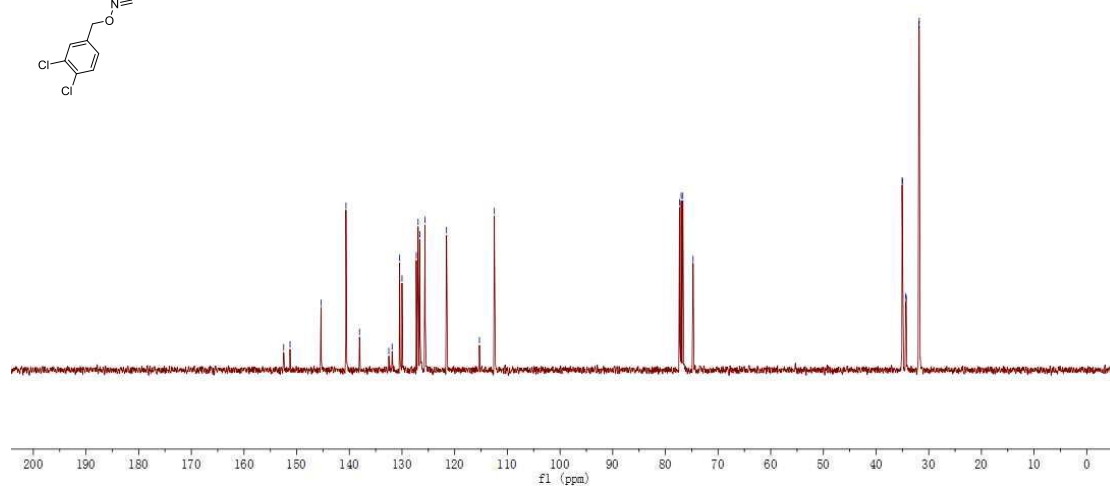

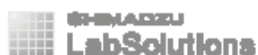

# Analysis Report

## <Sample Information>

Sample Name : 5126  
 Sample ID : 0.8/80  
 Data Filename : 7194.lcd  
 Method Filename : DL single run.lcm  
 Batch Filename :  
 Vial # : 1-4  
 Injection Volume : 10 uL  
 Date Acquired : 7/18/2018 6:09:11 PM  
 Date Processed : 7/18/2018 7:09:14 PM

Sample Type : Unknown  
 Acquired by : System Administrator  
 Processed by : System Administrator

## <Chromatogram>

mAU

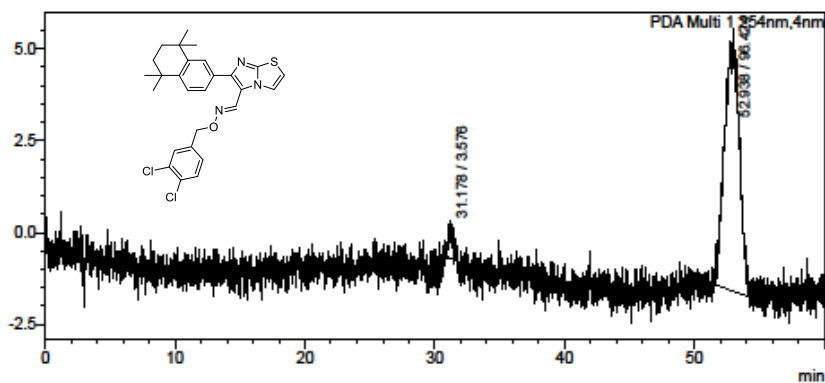

## <Peak Table>

PDA Ch1 254nm

| Peak# | Ret. Time | Area   | Height | Conc. | Unit | Mark | Area%   |
|-------|-----------|--------|--------|-------|------|------|---------|
| 1     | 31.178    | 20337  | 996    | 0.000 |      | M    | 3.576   |
| 2     | 52.938    | 548383 | 7112   | 0.000 |      | M    | 96.424  |
| Total |           | 568720 | 8109   |       |      |      | 100.000 |

C:\Users\sopl\Desktop\Xue Lab\Liang\7194.lcd



# Compound 14

DL5065H  
DL5065H

8.341  
7.931  
7.919  
7.603  
7.446  
7.440  
7.434  
7.430  
7.389  
7.368  
7.328  
7.308  
7.291  
7.271  
7.188  
7.168  
7.163  
6.866  
5.068

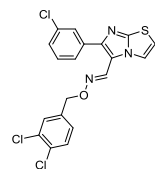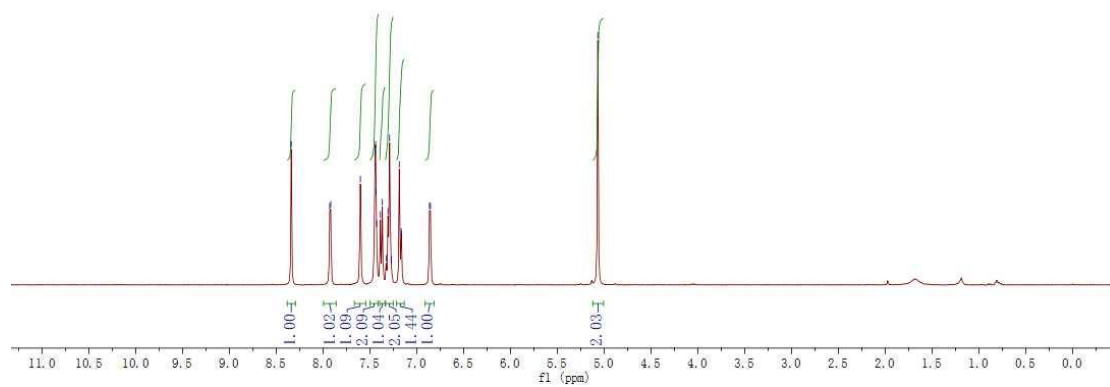

DL5065C  
DL5065C

152.65  
148.82  
139.78  
137.68  
135.11  
134.76  
132.59  
132.08  
130.12  
129.97  
128.44  
128.28  
127.40  
126.41  
124.56  
115.91  
113.16  
77.32  
77.00  
76.68  
74.99

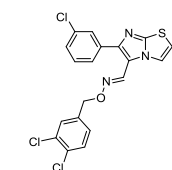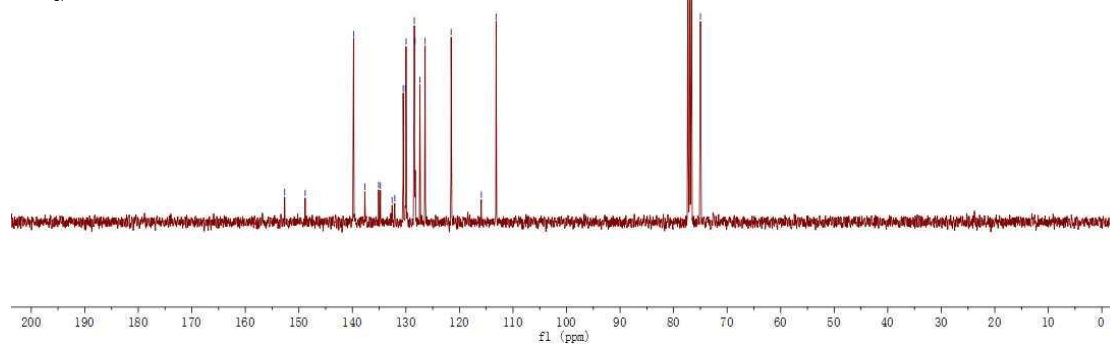



# Analysis Report

## <Sample Information>

Sample Name : 5065  
 Sample ID : 0.8/80  
 Data Filename : 7193.lcd  
 Method Filename : DL single run.lcm  
 Batch Filename :  
 Vial # : 1-4  
 Injection Volume : 10 uL  
 Date Acquired : 7/18/2018 5:44:59 PM  
 Date Processed : 7/18/2018 6:05:07 PM

Sample Type : Unknown  
 Acquired by : System Administrator  
 Processed by : System Administrator

## <Chromatogram>

mAU

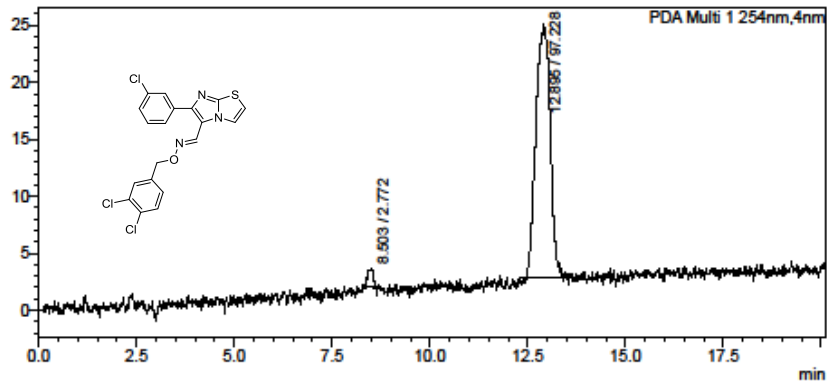

## <Peak Table>

PDA Ch1 254nm

| Peak# | Ret. Time | Area   | Height | Conc. | Unit | Mark | Area%   |
|-------|-----------|--------|--------|-------|------|------|---------|
| 1     | 8.503     | 15986  | 1711   | 0.000 |      | M    | 2.772   |
| 2     | 12.895    | 560698 | 22227  | 0.000 |      | M    | 97.228  |
| Total |           | 576684 | 23938  |       |      |      | 100.000 |

C:\Users\sopl\Desktop\Xue Lab\Liang\7193.lcd

# Compound 15

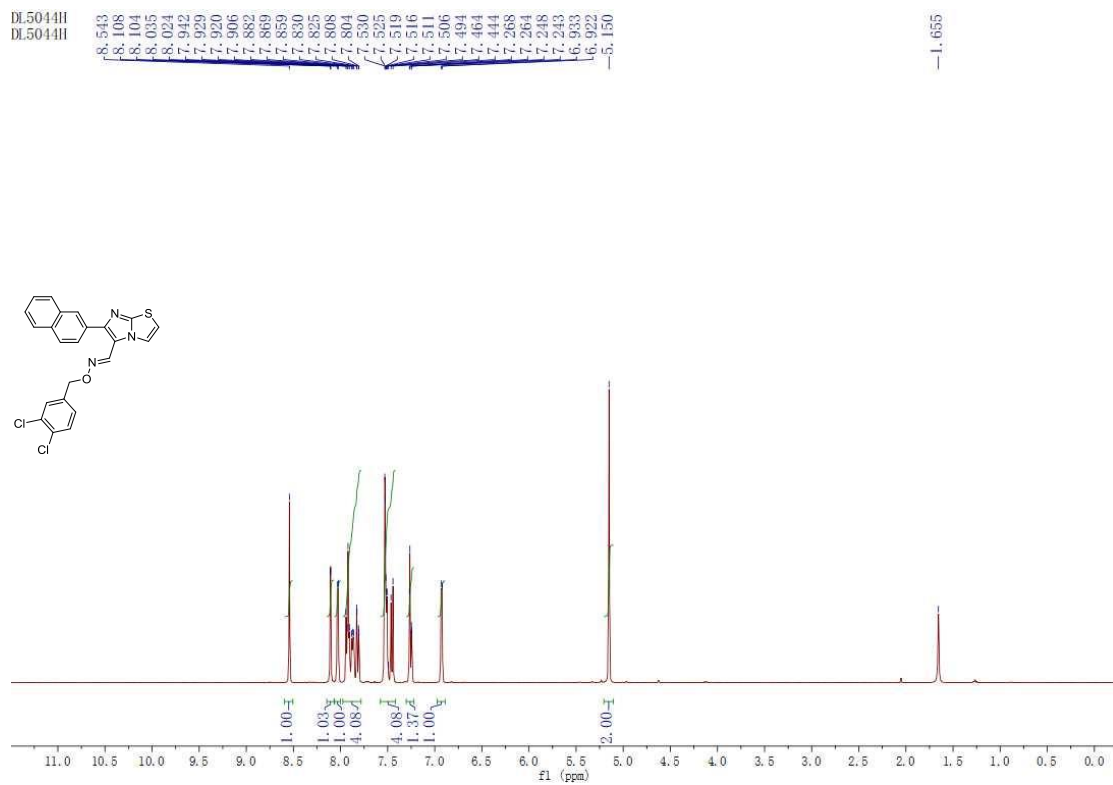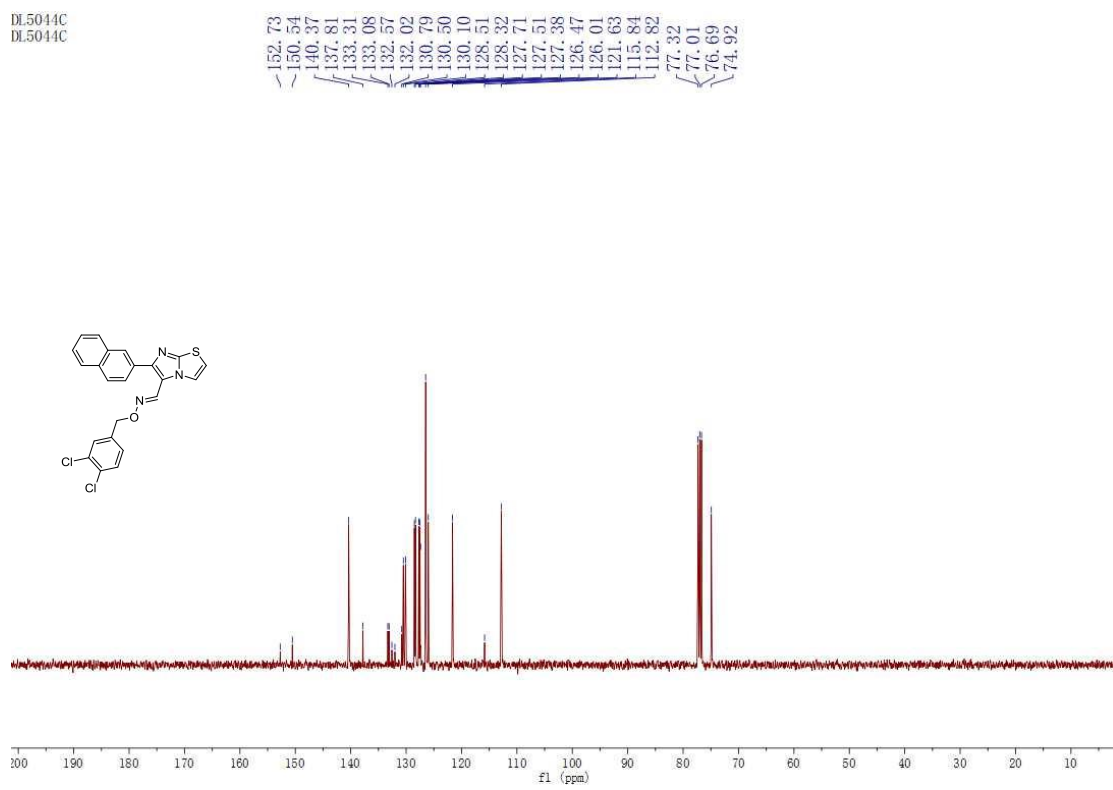

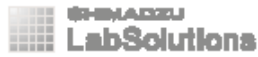

# Analysis Report

## <Sample Information>

Sample Name : 5044  
 Sample ID : 0.8/80  
 Data Filename : 7189.lcd  
 Method Filename : DL single run.lcm  
 Batch Filename :  
 Vial # : 1-4  
 Injection Volume : 10 uL  
 Date Acquired : 7/18/2018 3:30:12 PM  
 Date Processed : 7/18/2018 3:50:52 PM

Sample Type : Unknown  
 Acquired by : System Administrator  
 Processed by : System Administrator

## <Chromatogram>

mAU

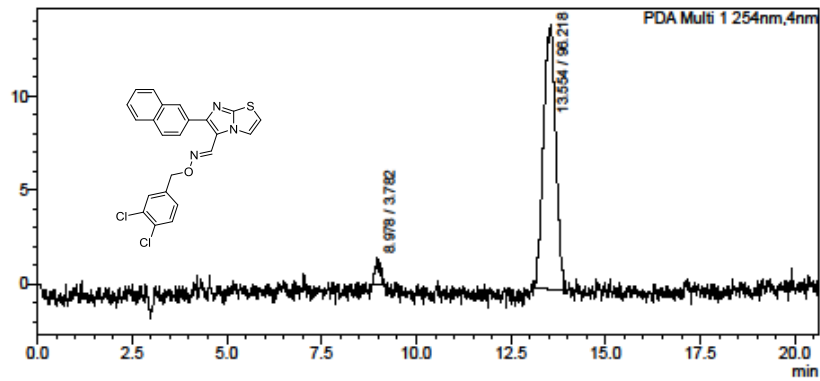

## <Peak Table>

PDA Ch1 254nm

| Peak# | Ret. Time | Area   | Height | Conc. | Unit | Mark | Area%   |
|-------|-----------|--------|--------|-------|------|------|---------|
| 1     | 8.978     | 12351  | 1445   | 0.000 |      | M    | 3.782   |
| 2     | 13.554    | 314174 | 14041  | 0.000 |      | M    | 96.218  |
| Total |           | 326524 | 15486  |       |      |      | 100.000 |

C:\Users\sop\Desktop\Xue Lab\Liang\7189.lcd

# Compound 16

DL5066H  
DL5066H

8.233  
8.219  
8.209  
8.109  
8.058  
8.046  
7.938  
7.931  
7.920  
7.913  
7.908  
7.900  
7.895  
7.554  
7.536  
7.527  
7.519  
7.509  
7.503  
7.491  
7.475  
7.470  
7.431  
7.410  
7.285  
7.207  
7.202  
7.186  
7.181  
6.964  
6.952  
5.084

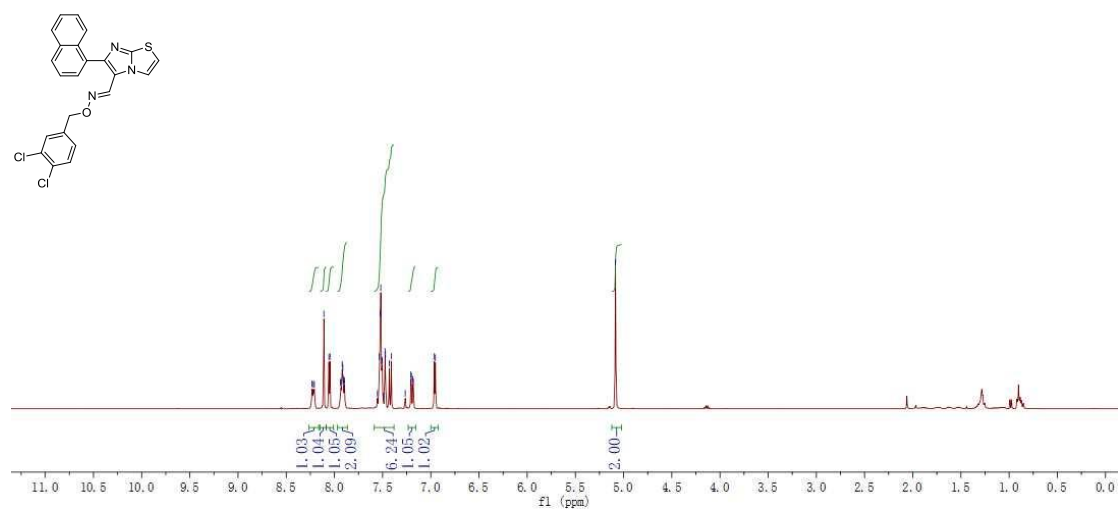

DL5066C  
DL5066C

152.41  
150.03  
140.14  
137.89  
133.86  
132.51  
132.12  
131.92  
130.45  
130.15  
130.01  
129.33  
128.81  
128.23  
127.32  
126.67  
126.50  
126.12  
126.09  
125.01  
121.41  
117.47  
112.92  
77.39  
77.07  
76.75  
74.79

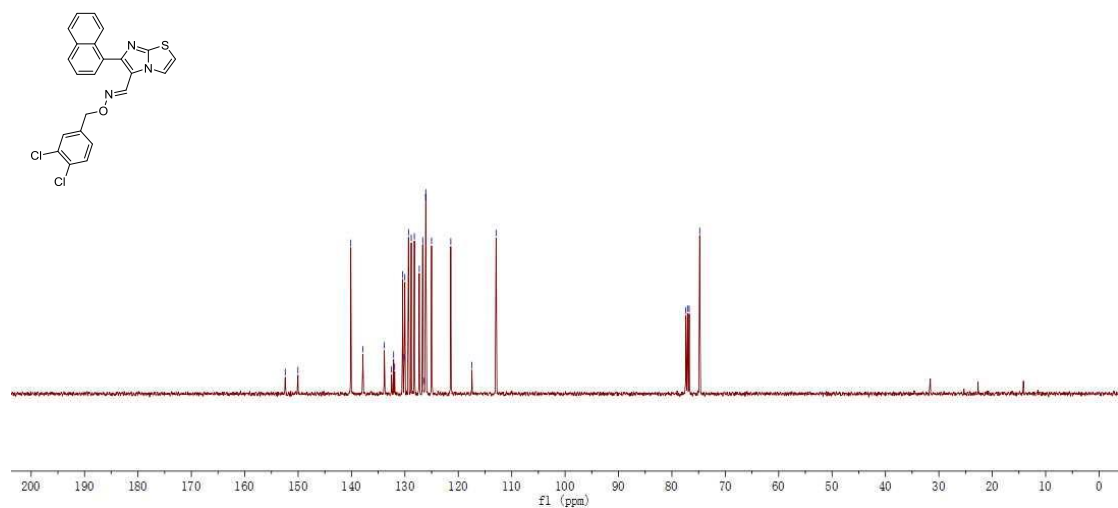

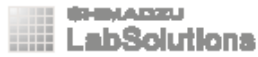

# Analysis Report

## <Sample Information>

Sample Name : 5086  
 Sample ID : 0.8/80  
 Data Filename : 7297.lcd  
 Method Filename : DL single run.lcm  
 Batch Filename :  
 Vial # : 1-4  
 Injection Volume : 80 uL  
 Date Acquired : 8/5/2018 12:37:33 PM  
 Date Processed : 8/5/2018 12:57:40 PM

Sample Type : Unknown  
 Acquired by : System Administrator  
 Processed by : System Administrator

## <Chromatogram>

mAU

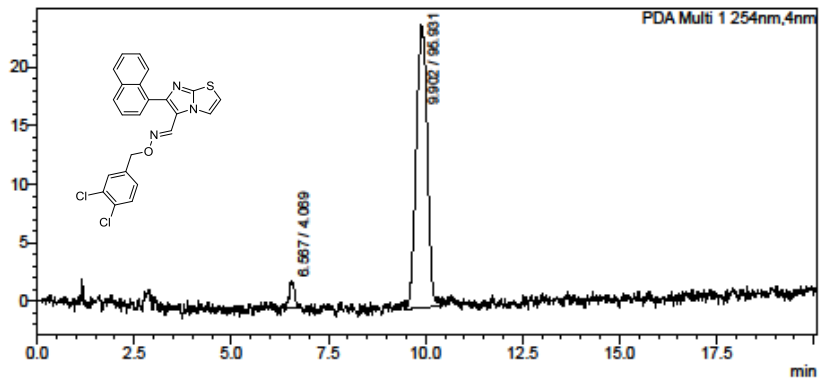

## <Peak Table>

PDA Ch1 254nm

| Peak# | Ret. Time | Area   | Height | Conc. | Unit | Mark | Area%   |
|-------|-----------|--------|--------|-------|------|------|---------|
| 1     | 6.567     | 20460  | 2312   | 0.000 |      | M    | 4.069   |
| 2     | 9.902     | 482418 | 24135  | 0.000 |      | M    | 95.931  |
| Total |           | 502878 | 26447  |       |      |      | 100.000 |

C:\Users\sopl\Desktop\Xue Lab\Liang\7297.lcd

# Compound 17

DL5071H  
DL5071H

8.254  
8.250  
7.886  
7.883  
7.872  
7.509  
7.504  
7.460  
7.450  
7.433  
7.429  
7.269  
7.265  
7.251  
7.246  
7.231  
7.226  
6.844  
6.840  
6.829  
5.102  
2.750  
2.731  
2.712  
2.693  
1.328  
1.310  
1.291

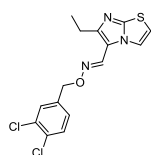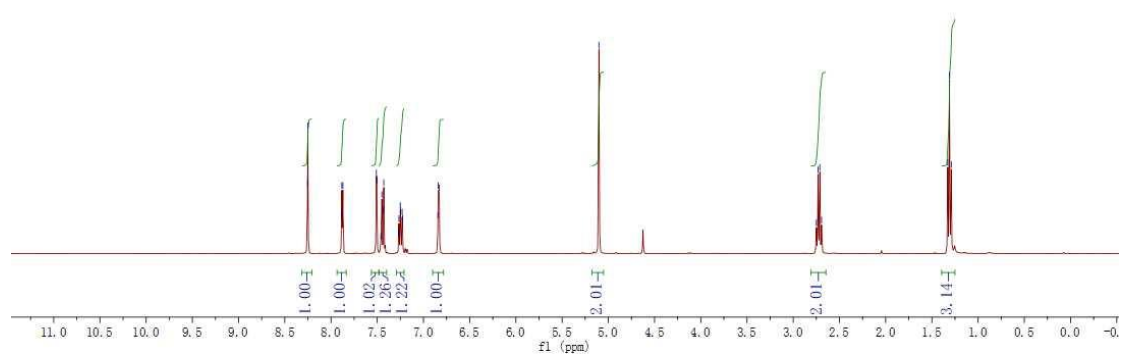

DL5071C  
DL5071C

154.03  
152.10  
138.83  
137.89  
132.51  
131.90  
130.44  
130.04  
127.33  
121.23  
115.02  
112.00  
77.32  
77.01  
76.69  
74.71  
-21.28  
-14.37

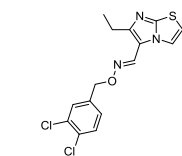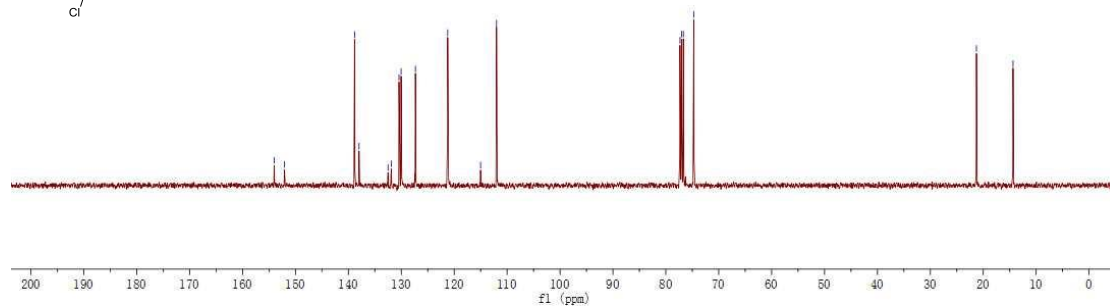



# Analysis Report

## <Sample Information>

Sample Name : 5071  
 Sample ID : 0.8/80  
 Data Filename : 7225.lcd  
 Method Filename : DL single run.lcm  
 Batch Filename :  
 Vial # : 1-4  
 Injection Volume : 10 uL  
 Date Acquired : 7/22/2018 1:12:11 PM  
 Date Processed : 7/22/2018 1:33:54 PM

Sample Type : Unknown  
 Acquired by : System Administrator  
 Processed by : System Administrator

## <Chromatogram>

mAU

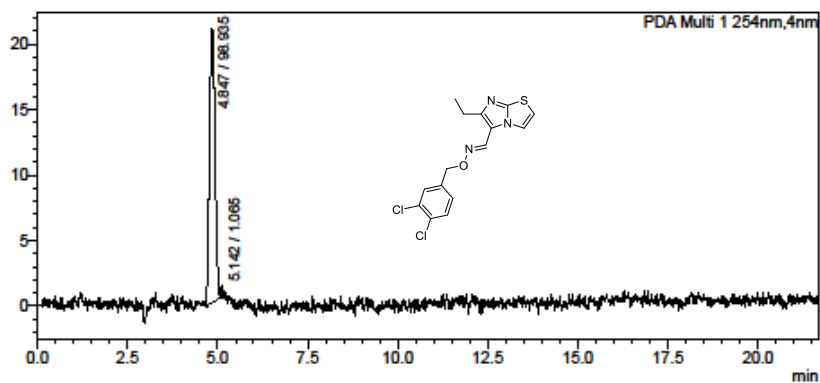

## <Peak Table>

PDA Ch1 254nm

| Peak# | Ret. Time | Area   | Height | Conc. | Unit | Mark | Area%   |
|-------|-----------|--------|--------|-------|------|------|---------|
| 1     | 4.847     | 222277 | 20830  | 0.000 |      | M    | 98.935  |
| 2     | 5.142     | 2392   | 940    | 0.000 |      | M    | 1.065   |
| Total |           | 224669 | 21870  |       |      |      | 100.000 |

C:\Users\sop\Desktop\Xue Lab\Liang\7225.lcd



# Compound 18

DL5043H  
DL5043I

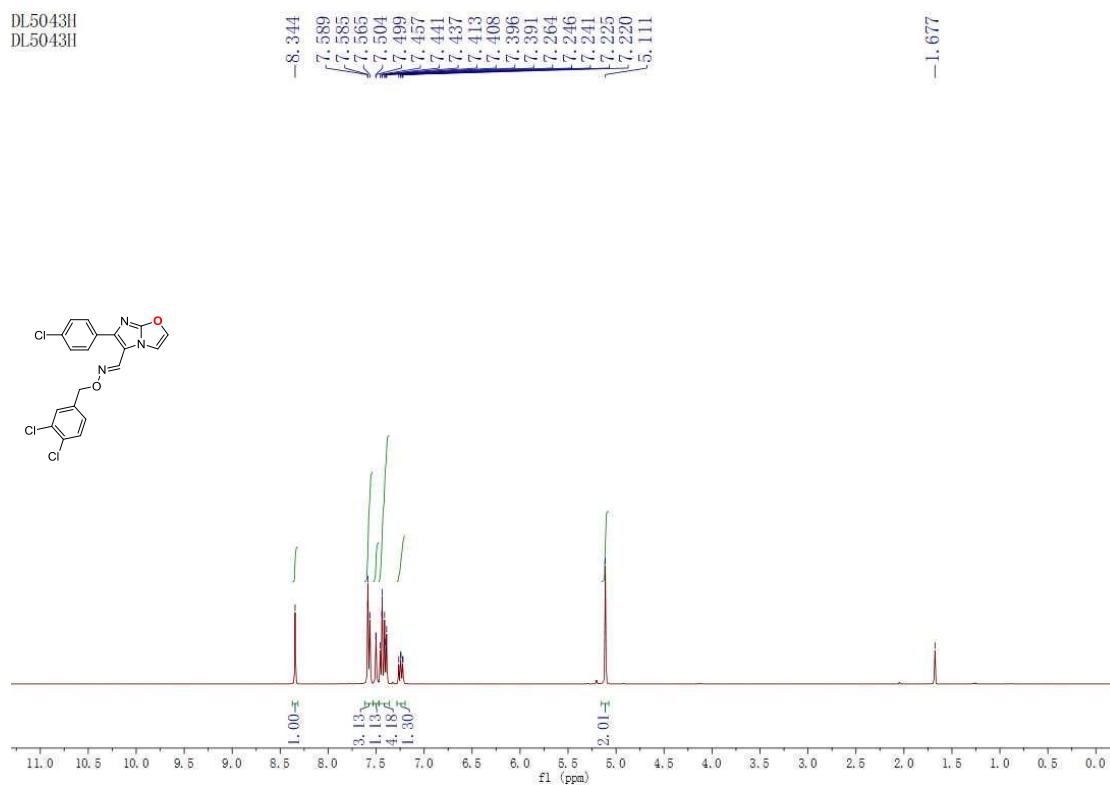

DL5043C  
DL5043C

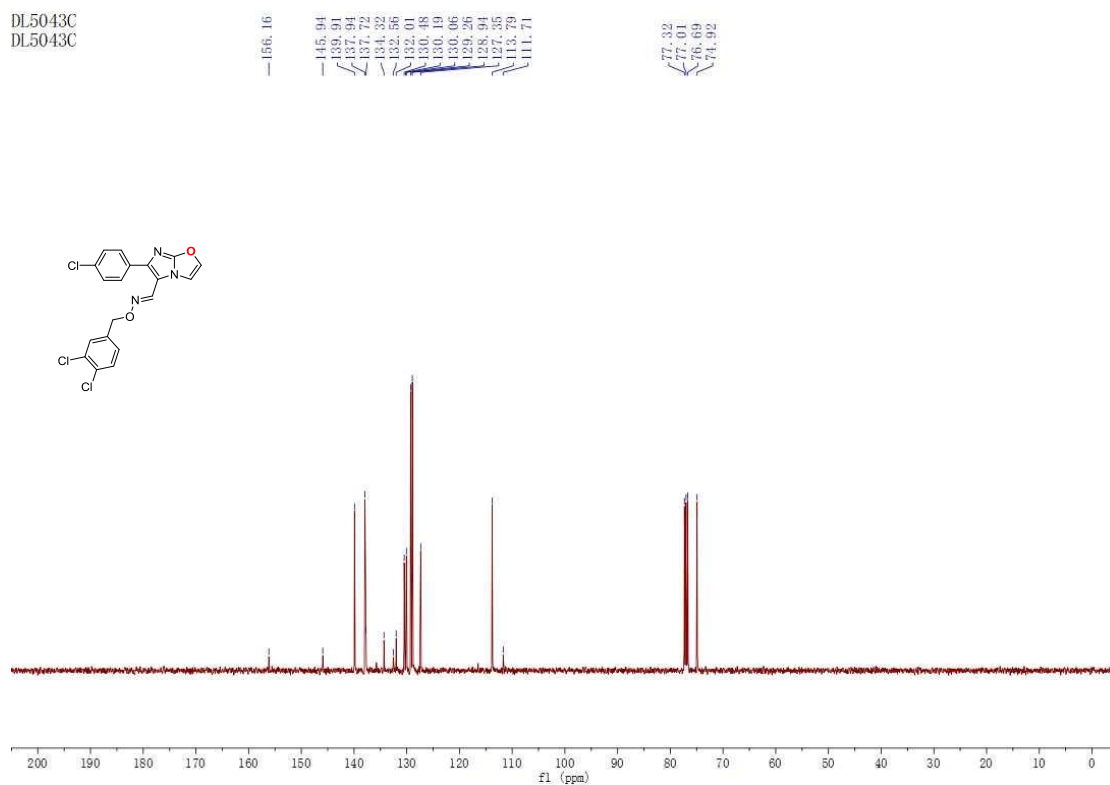

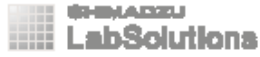

# Analysis Report

## <Sample Information>

Sample Name : 5043  
 Sample ID : 0.8/80  
 Data Filename : 7188.lcd  
 Method Filename : DL single run.lcm  
 Batch Filename :  
 Vial # : 1-4  
 Injection Volume : 10 uL  
 Date Acquired : 7/18/2018 2:51:41 PM  
 Date Processed : 7/18/2018 3:22:25 PM

Sample Type : Unknown  
 Acquired by : System Administrator  
 Processed by : System Administrator

## <Chromatogram>

mAU

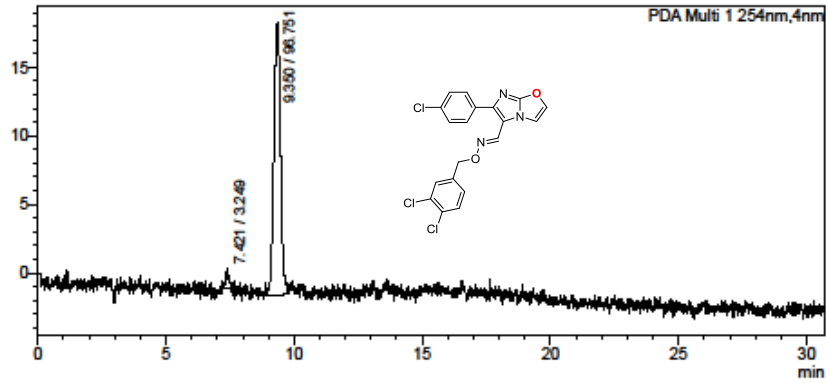

## <Peak Table>

PDA Ch1 254nm

| Peak# | Ret. Time | Area   | Height | Conc. | Unit | Mark | Area%   |
|-------|-----------|--------|--------|-------|------|------|---------|
| 1     | 7.421     | 12000  | 1479   | 0.000 |      | M    | 3.249   |
| 2     | 9.350     | 357345 | 19829  | 0.000 |      | M    | 96.751  |
| Total |           | 369345 | 21308  |       |      |      | 100.000 |

C:\Users\sopl\Desktop\Xue Lab\Liang\7188.lcd

# Compound 19

DL5050H  
DL5050H

8.498  
8.099  
7.918  
7.898  
7.869  
7.855  
7.846  
7.810  
7.805  
7.788  
7.784  
7.622  
7.618  
7.523  
7.518  
7.508  
7.501  
7.497  
7.484  
7.465  
7.456  
7.451  
7.444  
7.257  
7.241  
7.236  
5.129

1.677

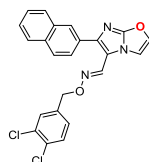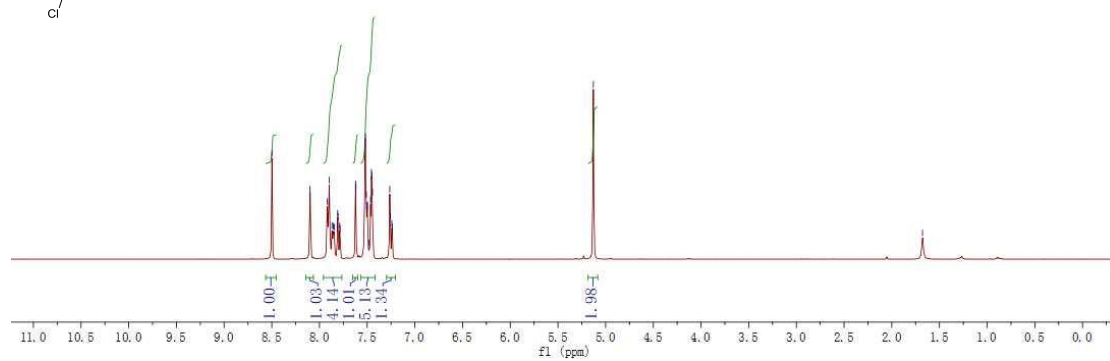

DL5050C  
DL5050C

156.31  
147.25  
140.42  
137.86  
137.79  
133.31  
133.04  
132.56  
132.02  
130.93  
130.49  
130.08  
128.47  
128.30  
127.69  
127.37  
127.22  
126.47  
126.44  
125.79  
113.87  
111.86  
77.32  
77.01  
76.69  
74.91

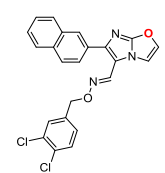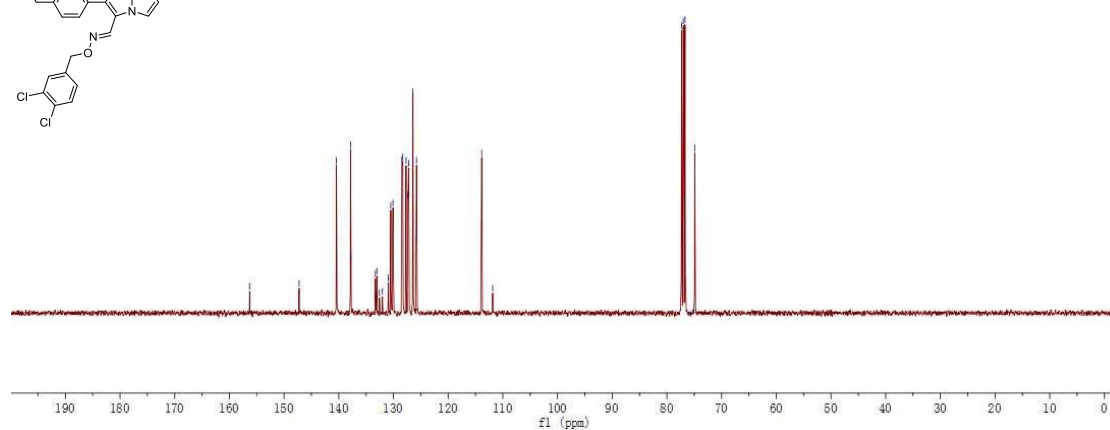



# Analysis Report

## <Sample Information>

|                  |                        |              |                        |
|------------------|------------------------|--------------|------------------------|
| Sample Name      | : 5050                 | Sample Type  | : Unknown              |
| Sample ID        | : 0.8/80               | Acquired by  | : System Administrator |
| Data Filename    | : 7230.lcd             | Processed by | : System Administrator |
| Method Filename  | : DL single run.lcm    |              |                        |
| Batch Filename   | :                      |              |                        |
| Vial #           | : 1-4                  |              |                        |
| Injection Volume | : 10 uL                |              |                        |
| Date Acquired    | : 7/22/2018 3:46:02 PM |              |                        |
| Date Processed   | : 7/22/2018 4:07:07 PM |              |                        |

## <Chromatogram>

mAU

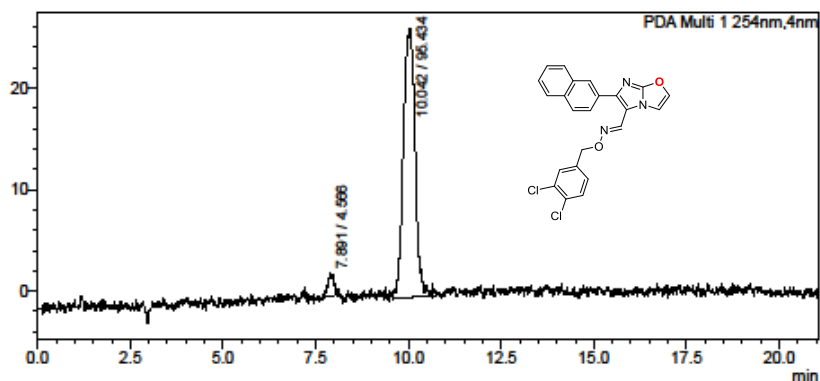

## <Peak Table>

PDA Ch1 254nm

| Peak# | Ret. Time | Area   | Height | Conc. | Unit | Mark | Area%   |
|-------|-----------|--------|--------|-------|------|------|---------|
| 1     | 7.891     | 27786  | 2327   | 0.000 |      | M    | 4.566   |
| 2     | 10.042    | 580782 | 28370  | 0.000 |      | M    | 95.434  |
| Total |           | 608568 | 28696  |       |      |      | 100.000 |

C:\Users\sopl\Desktop\Xue Lab\Liang\7230.lcd

# Compound 20

DL5096-III  
DL5096-III

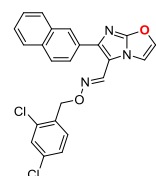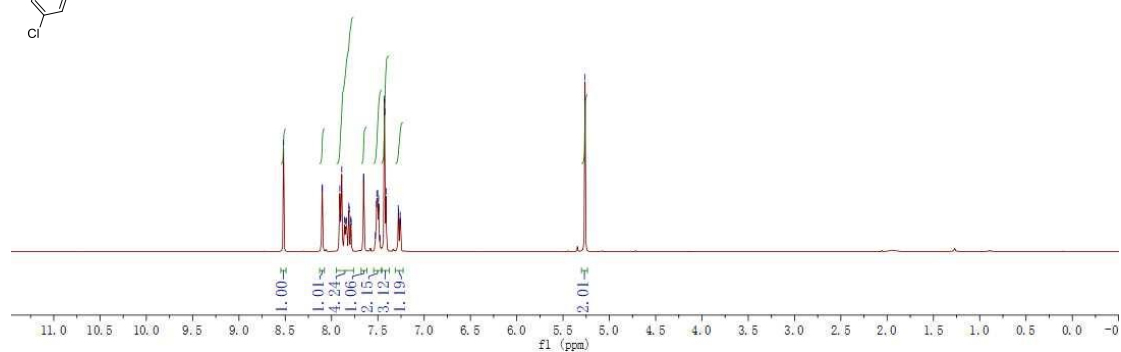

DL5096-1C  
DL5096-1C

156.28  
147.13  
140.37  
137.83  
134.31  
134.03  
133.96  
133.31  
133.03  
130.96  
130.82  
129.30  
128.46  
128.30  
127.69  
127.19  
127.14  
126.46  
126.42  
125.79  
113.95  
111.88  
77.36  
77.04  
76.73  
72.75

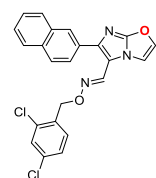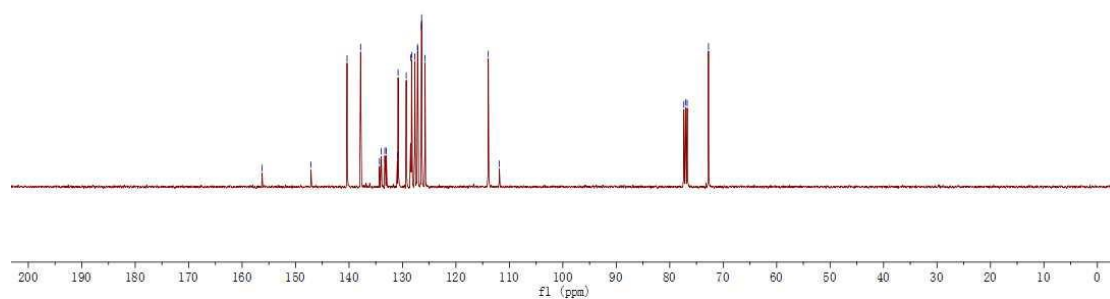

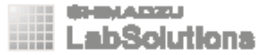

# Analysis Report

## <Sample Information>

Sample Name : 5098-1  
 Sample ID : 0.8/80  
 Data Filename : 7221.lcd  
 Method Filename : DL single run.lcm  
 Batch Filename :  
 Vial # : 1-4  
 Injection Volume : 10 uL  
 Date Acquired : 7/20/2018 4:19:13 PM  
 Date Processed : 7/20/2018 4:46:17 PM

Sample Type : Unknown  
 Acquired by : System Administrator  
 Processed by : System Administrator

## <Chromatogram>

MAU

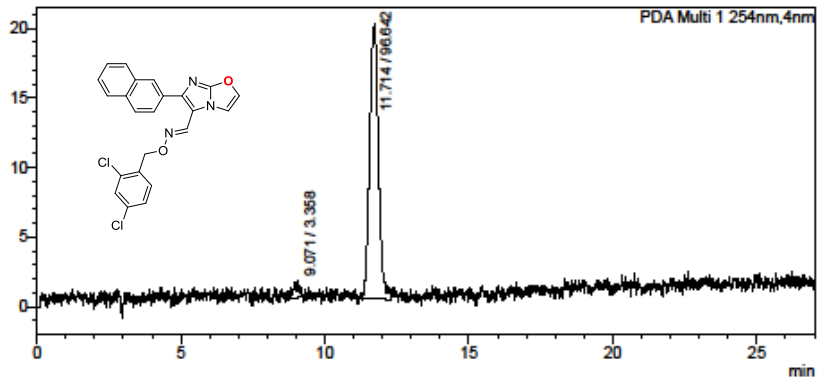

## <Peak Table>

PDA Ch1 254nm

| Peak# | Ret. Time | Area   | Height | Conc. | Unit | Mark | Area%   |
|-------|-----------|--------|--------|-------|------|------|---------|
| 1     | 9.071     | 14688  | 1282   | 0.000 |      | M    | 3.358   |
| 2     | 11.714    | 422168 | 19748  | 0.000 |      | M    | 96.642  |
| Total |           | 436834 | 21029  |       |      |      | 100.000 |

C:\Users\isopl\Desktop\Xue Lab\Liang\7221.lcd

# Compound 21

DL5098-2H  
DL5098-2H

8.540  
8.112  
8.108  
7.911  
7.903  
7.800  
7.801  
7.837  
7.838  
7.823  
7.819  
7.802  
7.798  
7.683  
7.679  
7.531  
7.527  
7.515  
7.510  
7.500  
7.491  
7.487  
7.475  
7.428  
7.418  
7.413  
7.405  
7.316  
7.312  
7.298  
7.293  
7.289  
7.282  
7.275  
7.271  
7.265  
7.252  
5.331

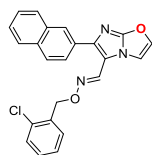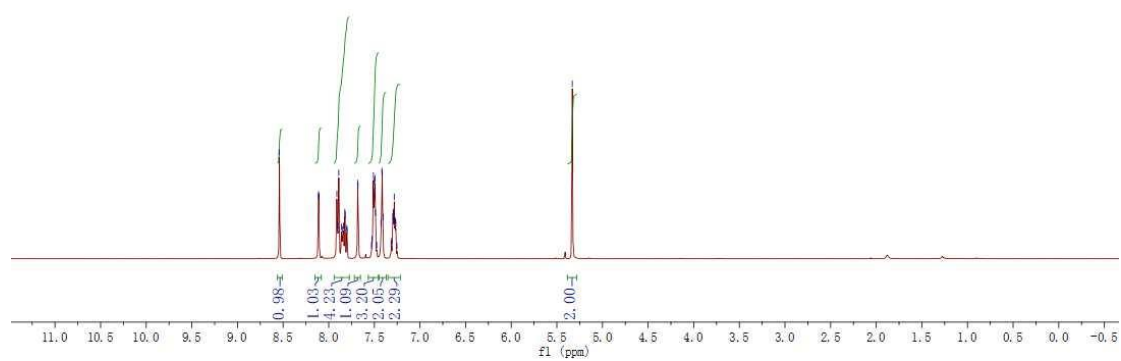

DL5098-2C  
DL5098-2C

156.25  
146.86  
140.10  
137.76  
135.24  
133.48  
133.33  
133.01  
131.04  
130.14  
129.51  
129.26  
128.44  
128.30  
127.69  
127.14  
126.82  
126.43  
126.38  
125.80  
114.02  
112.06  
77.37  
77.05  
76.73  
73.45

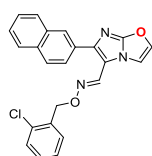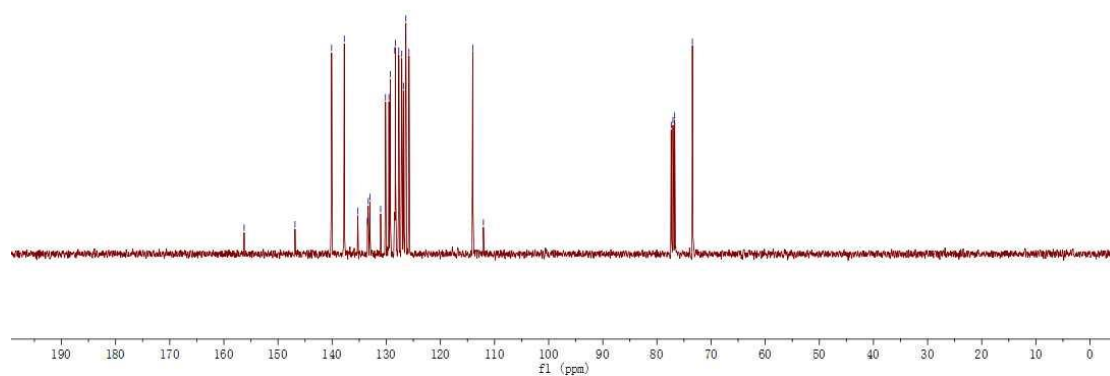



# Analysis Report

## <Sample Information>

Sample Name : 5098-2  
 Sample ID : 0.8/80  
 Data Filename : 7244.lcd  
 Method Filename : DL single run.lcm  
 Batch Filename :  
 Vial # : 1-4  
 Injection Volume : 10 uL  
 Date Acquired : 7/23/2018 5:30:52 PM  
 Date Processed : 7/23/2018 5:52:00 PM

Sample Type : Unknown  
 Acquired by : System Administrator  
 Processed by : System Administrator

## <Chromatogram>

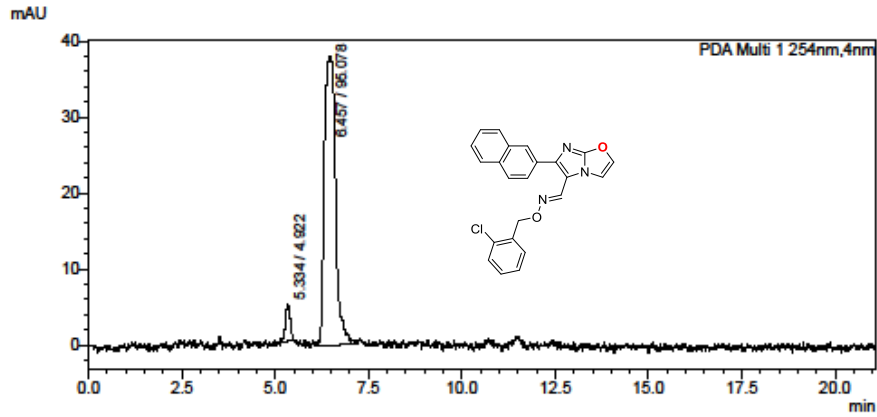

## <Peak Table>

| PDA Ch1 254nm |           |        |        |       |      |      |         |
|---------------|-----------|--------|--------|-------|------|------|---------|
| Peak#         | Ret. Time | Area   | Height | Conc. | Unit | Mark | Area%   |
| 1             | 5.334     | 41004  | 4955   | 0.000 |      | M    | 4.922   |
| 2             | 6.457     | 792005 | 37940  | 0.000 |      | M    | 95.078  |
| Total         |           | 833008 | 42894  |       |      |      | 100.000 |

C:\Users\sopl\Desktop\Xue Lab\Liang\7244.lcd



# Compound 22

DL5096-3H  
DL5096-3H

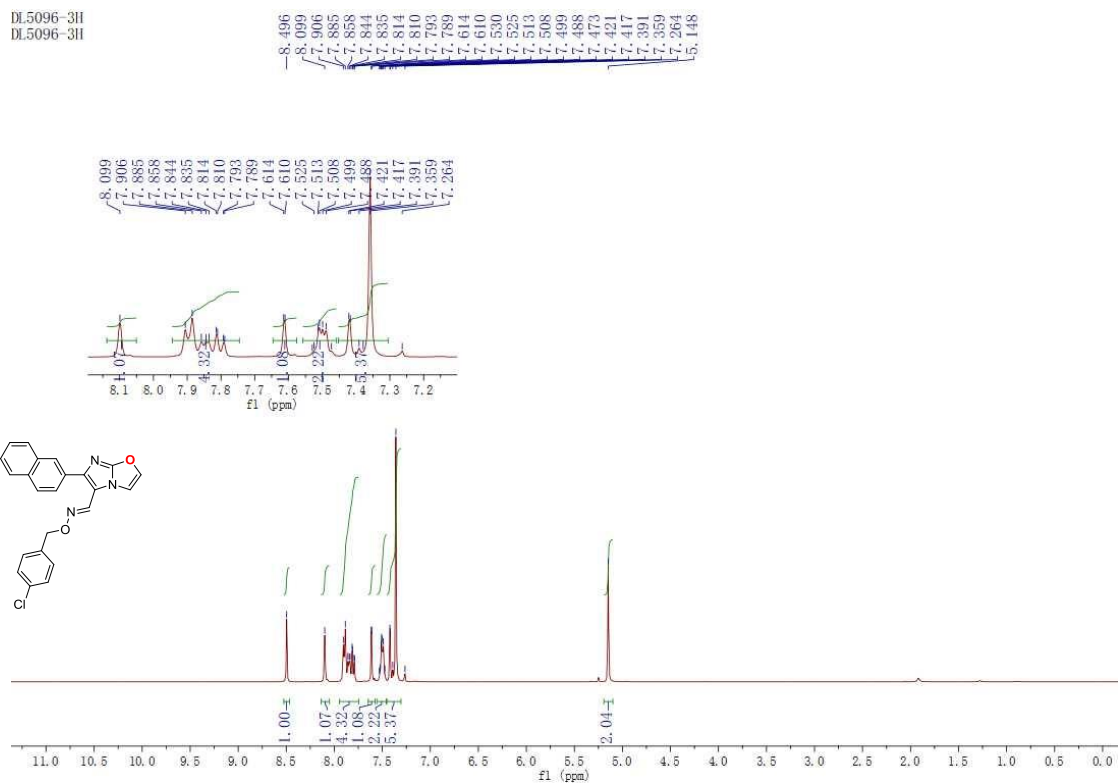

DL5096-3C  
DL5096-3C

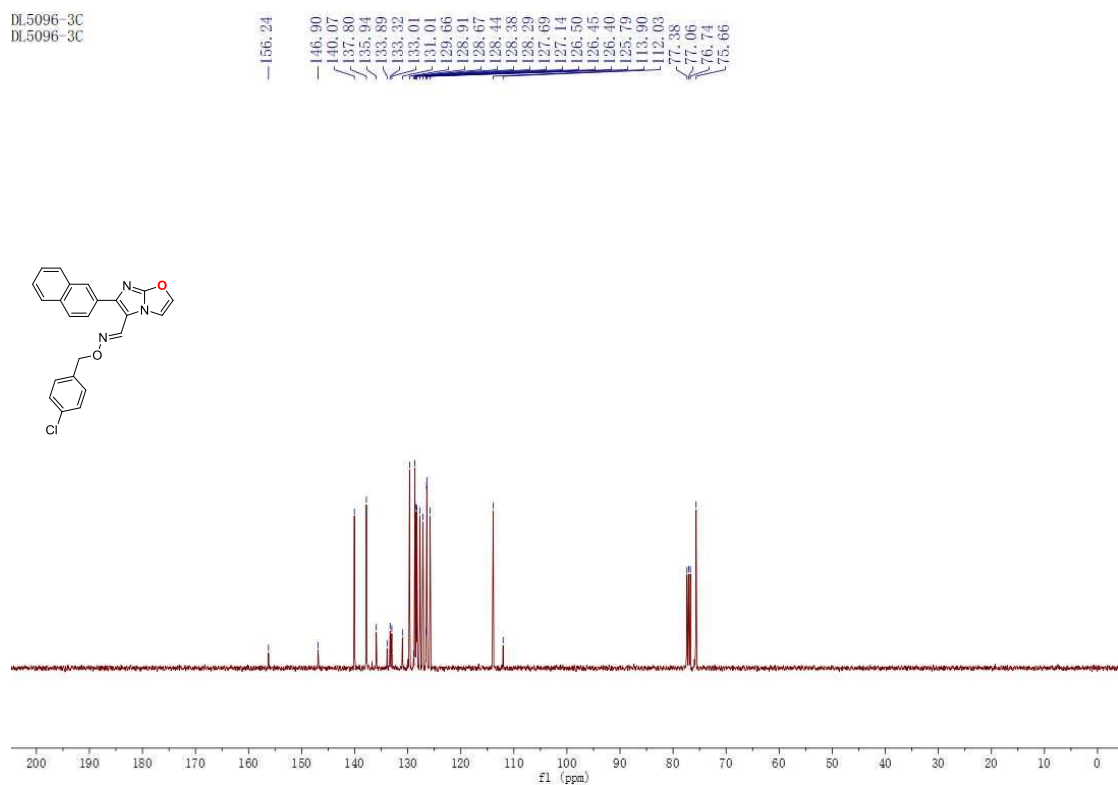



# Analysis Report

## <Sample Information>

Sample Name : 5096-3  
 Sample ID : 0.8/80  
 Data Filename : 7252.lcd  
 Method Filename : DL single run.lcm  
 Batch Filename :  
 Vial # : 1-4  
 Injection Volume : 10 uL  
 Date Acquired : 7/25/2018 5:44:00 PM  
 Date Processed : 7/25/2018 6:01:33 PM  
 Sample Type : Unknown  
 Acquired by : System Administrator  
 Processed by : System Administrator

## <Chromatogram>

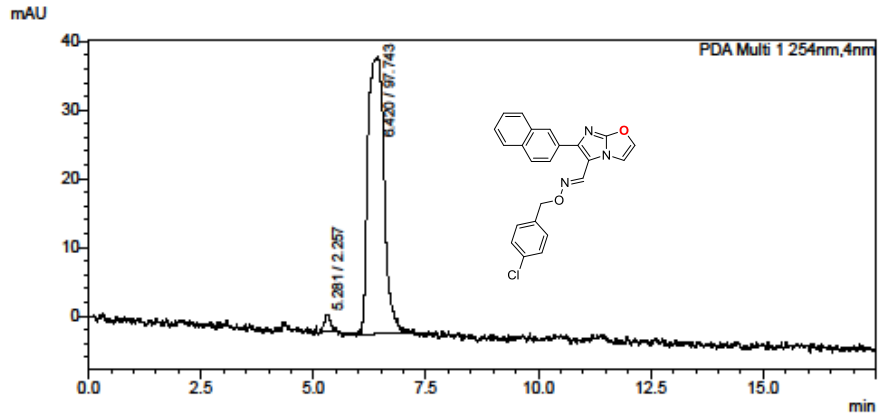

## <Peak Table>

| PDA Ch1 254nm |           |         |        |       |      |      |         |
|---------------|-----------|---------|--------|-------|------|------|---------|
| Peak#         | Ret. Time | Area    | Height | Conc. | Unit | Mark | Area%   |
| 1             | 5.281     | 23235   | 2434   | 0.000 |      | M    | 2.257   |
| 2             | 6.420     | 1006255 | 40354  | 0.000 |      | M    | 97.743  |
| Total         |           | 1029490 | 42788  |       |      |      | 100.000 |

C:\Users\sopl\Desktop\Xue Lab\Liang\7252.lcd

# Compound 23

DL5098-3H  
DL5098-3H

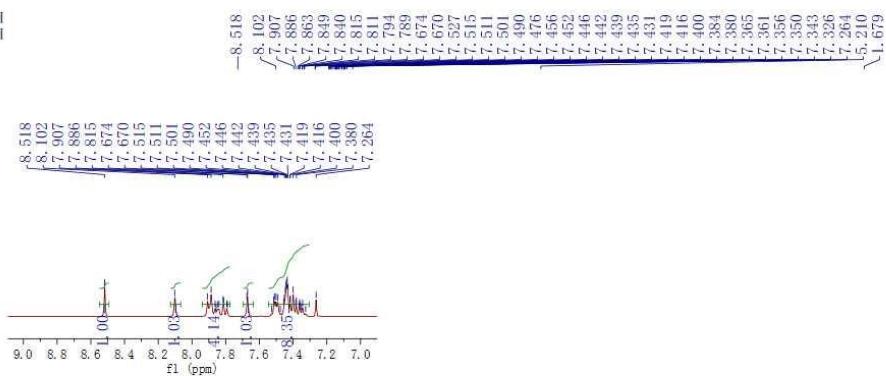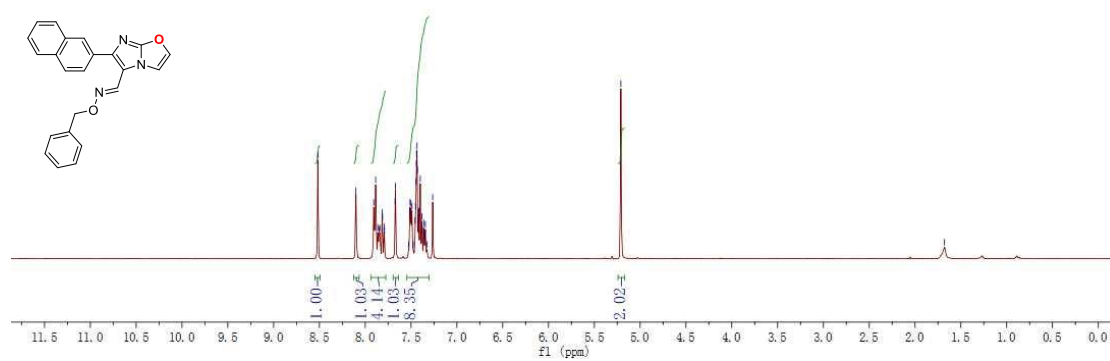

DL5098-3C  
DL5098-3C

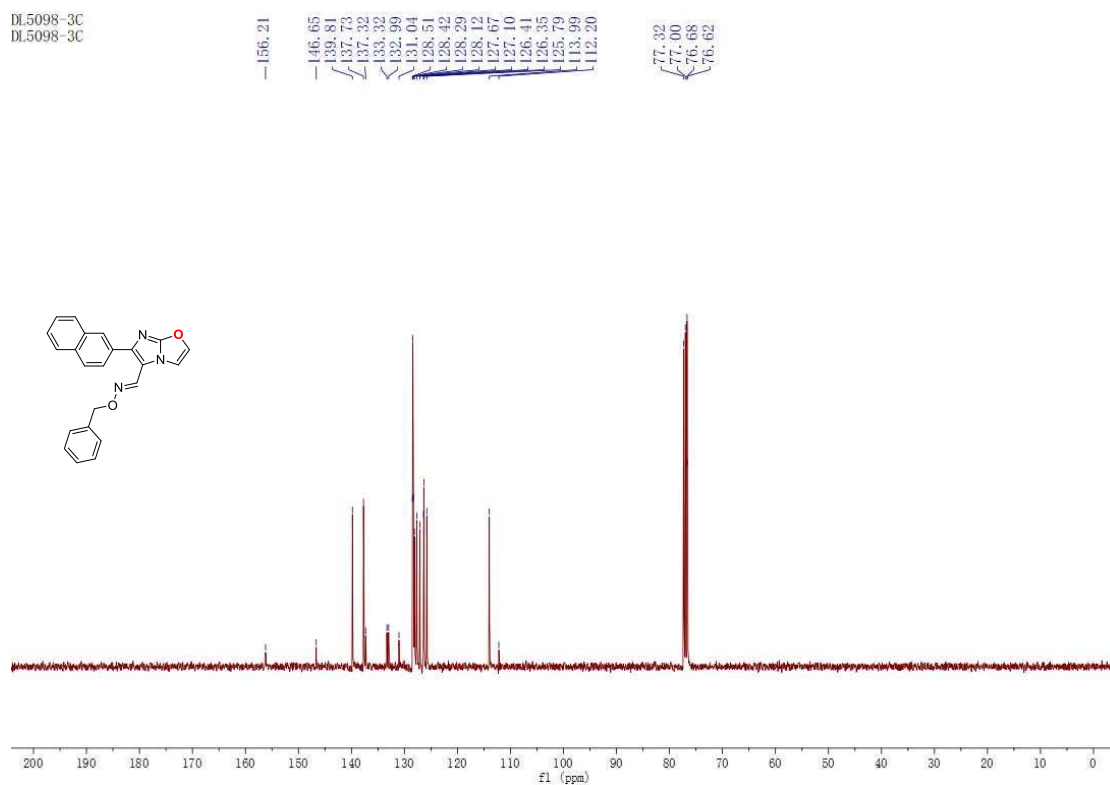

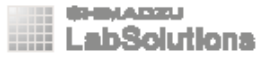

# Analysis Report

## <Sample Information>

Sample Name : 5098-3  
 Sample ID : 0.8/80  
 Data Filename : 7235.lcd  
 Method Filename : DL single run.lcm  
 Batch Filename :  
 Vial # : 1-4  
 Injection Volume : 10 uL  
 Date Acquired : 7/22/2018 5:55:52 PM  
 Date Processed : 7/22/2018 6:11:22 PM

Sample Type : Unknown  
 Acquired by : System Administrator  
 Processed by : System Administrator

## <Chromatogram>

mAU

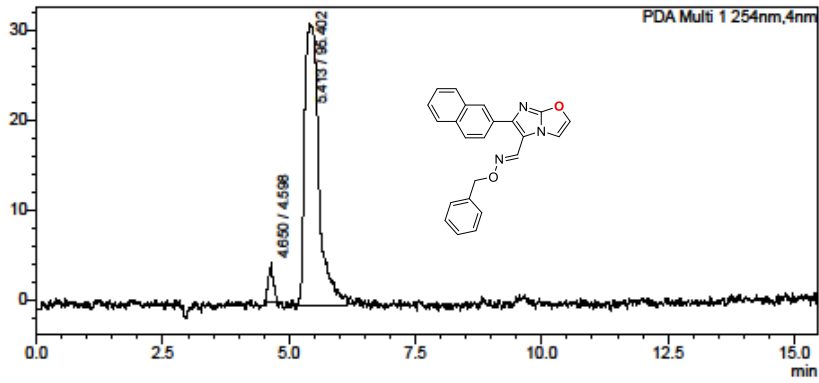

## <Peak Table>

PDA Ch1 254nm

| Peak# | Ret. Time | Area   | Height | Conc. | Unit | Mark | Area%   |
|-------|-----------|--------|--------|-------|------|------|---------|
| 1     | 4.650     | 29884  | 4458   | 0.000 |      | M    | 4.598   |
| 2     | 5.413     | 620116 | 31292  | 0.000 |      | M    | 95.402  |
| Total |           | 650000 | 35748  |       |      |      | 100.000 |

C:\Users\sop\Desktop\Xue Lab\Liang\7235.lcd

# Compound 24

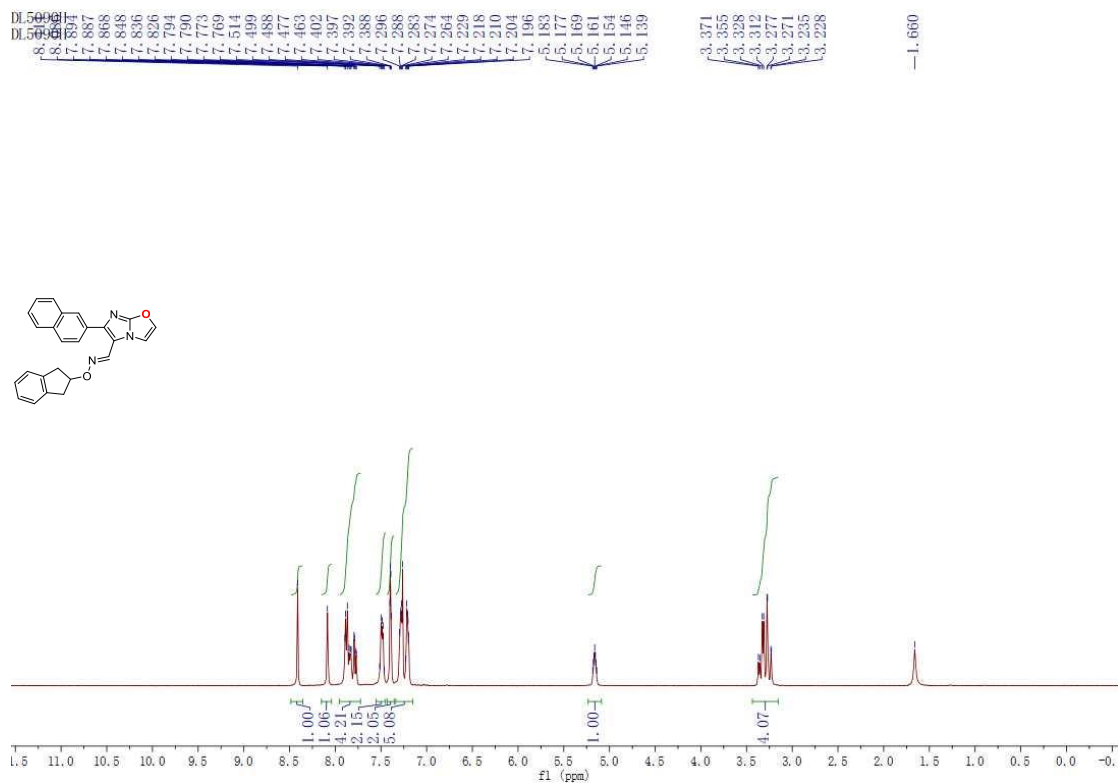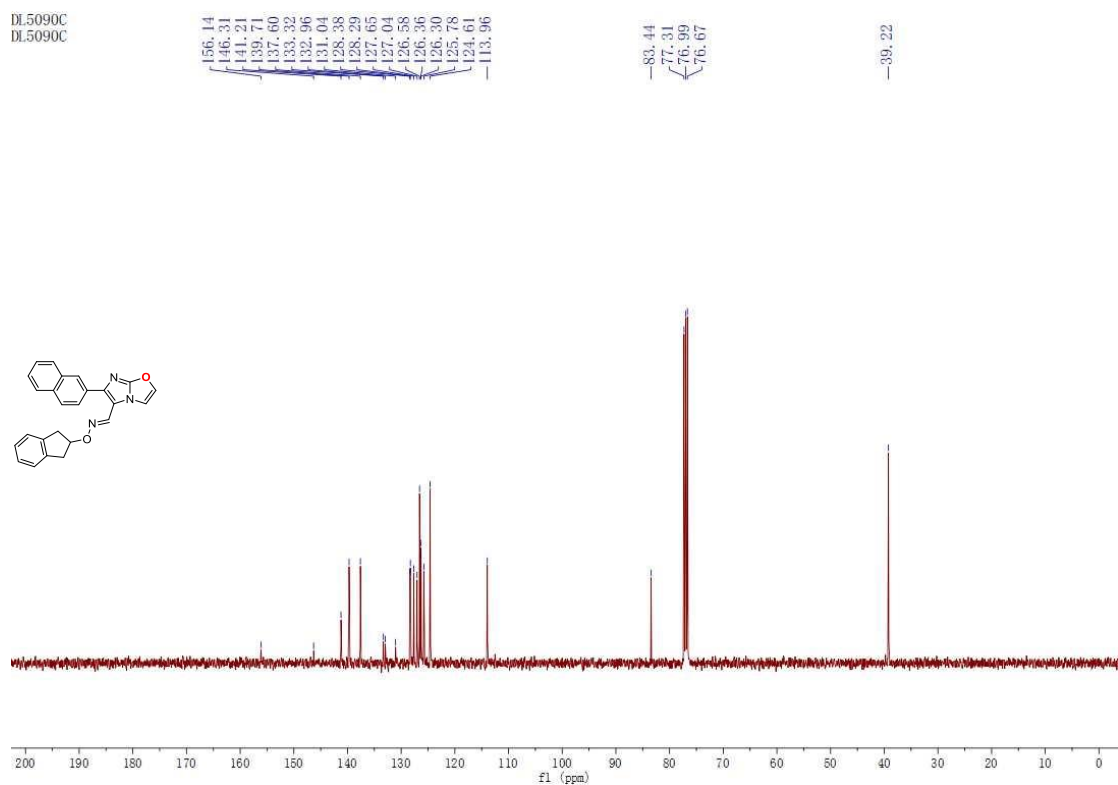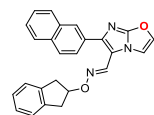



# Analysis Report

## <Sample Information>

Sample Name : 5090  
 Sample ID : 0.8/80  
 Data Filename : 7239.lcd  
 Method Filename : DL single run.lcm  
 Batch Filename :  
 Vial # : 1-4  
 Injection Volume : 10 uL  
 Date Acquired : 7/23/2018 3:56:48 PM  
 Date Processed : 7/23/2018 4:17:23 PM

Sample Type : Unknown  
 Acquired by : System Administrator  
 Processed by : System Administrator

## <Chromatogram>

mAU

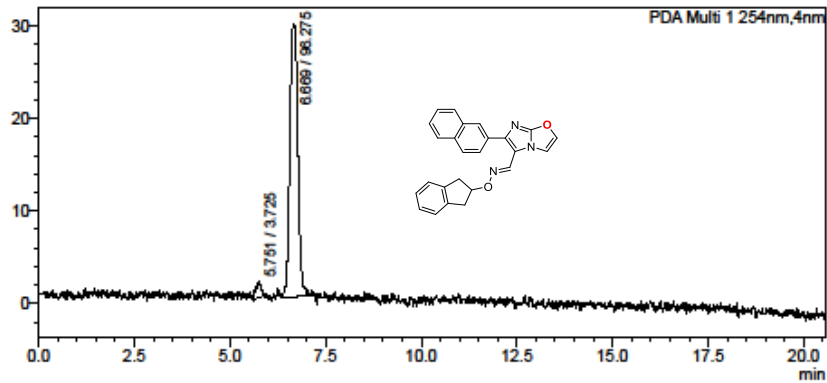

## <Peak Table>

PDA Ch1 254nm

| Peak# | Ret. Time | Area   | Height | Conc. | Unit | Mark | Area%   |
|-------|-----------|--------|--------|-------|------|------|---------|
| 1     | 5.751     | 16614  | 1804   | 0.000 |      | M    | 3.725   |
| 2     | 6.669     | 429361 | 29414  | 0.000 |      | M    | 96.275  |
| Total |           | 445975 | 31218  |       |      |      | 100.000 |

C:\Users\sopl\Desktop\Xue Lab\Liang\7239.lcd

# Compound 25

DL5098-III  
DL5098-III

8.407  
8.063  
8.039  
7.896  
7.885  
7.875  
7.852  
7.839  
7.829  
7.773  
7.769  
7.752  
7.747  
7.715  
7.711  
7.523  
7.510  
7.505  
7.498  
7.487  
7.483  
7.263  
5.257  
5.253  
5.249

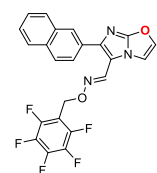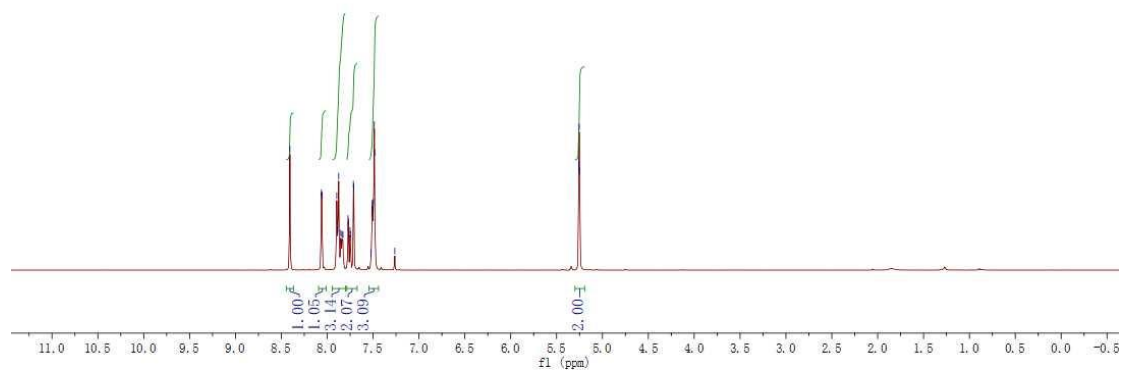

DL5098-1C  
DL5098-1C

156.37  
147.62  
147.02  
144.53  
142.68  
140.89  
140.22  
138.70  
138.00  
136.98  
136.64  
136.20  
133.27  
133.04  
130.83  
128.45  
128.37  
128.27  
127.66  
127.21  
126.45  
125.73  
123.75  
113.50  
111.20  
111.04  
110.85  
77.34  
77.03  
76.71  
62.60

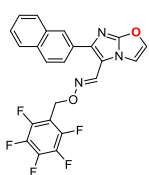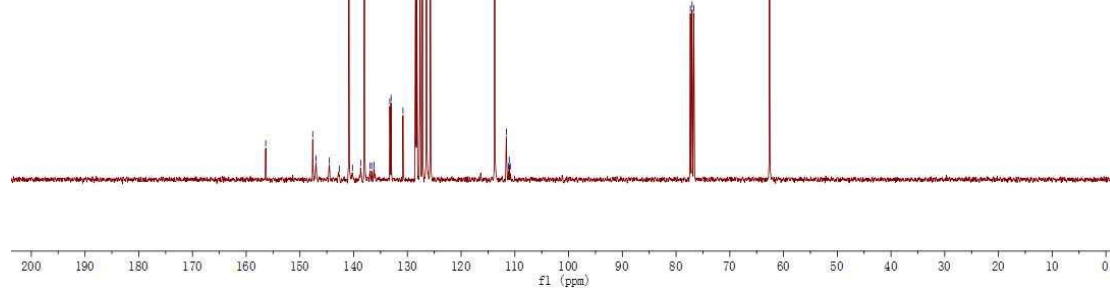



# Analysis Report

## <Sample Information>

|                  |                        |              |                        |
|------------------|------------------------|--------------|------------------------|
| Sample Name      | : 5098-1               | Sample Type  | : Unknown              |
| Sample ID        | : 0.8/80               | Acquired by  | : System Administrator |
| Data Filename    | : 7234.lcd             | Processed by | : System Administrator |
| Method Filename  | : DL single run.lcm    |              |                        |
| Batch Filename   | :                      |              |                        |
| Vial #           | : 1-4                  |              |                        |
| Injection Volume | : 10 uL                |              |                        |
| Date Acquired    | : 7/22/2018 5:34:52 PM |              |                        |
| Date Processed   | : 7/22/2018 5:55:00 PM |              |                        |

## <Chromatogram>

mAU

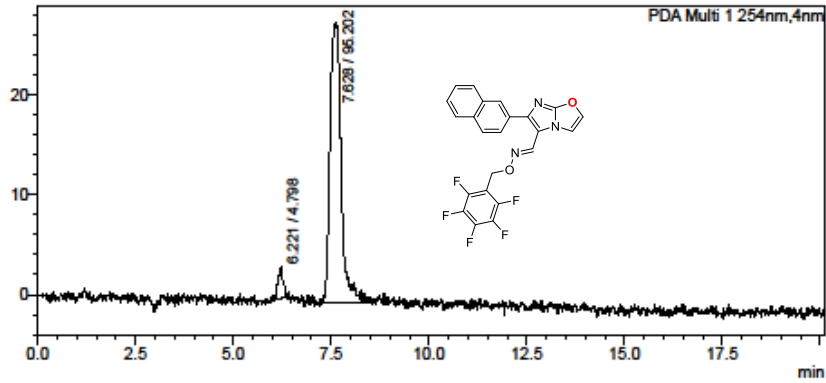

## <Peak Table>

PDA Ch1 254nm

| Peak# | Ret. Time | Area   | Height | Conc. | Unit | Mark | Area%   |
|-------|-----------|--------|--------|-------|------|------|---------|
| 1     | 6.221     | 28429  | 3117   | 0.000 |      | M    | 4.798   |
| 2     | 7.628     | 564032 | 28063  | 0.000 |      | M    | 95.202  |
| Total |           | 592461 | 31180  |       |      |      | 100.000 |

C:\Users\sopl\Desktop\Xue Lab\Liang\7234.lcd



# Compound 26

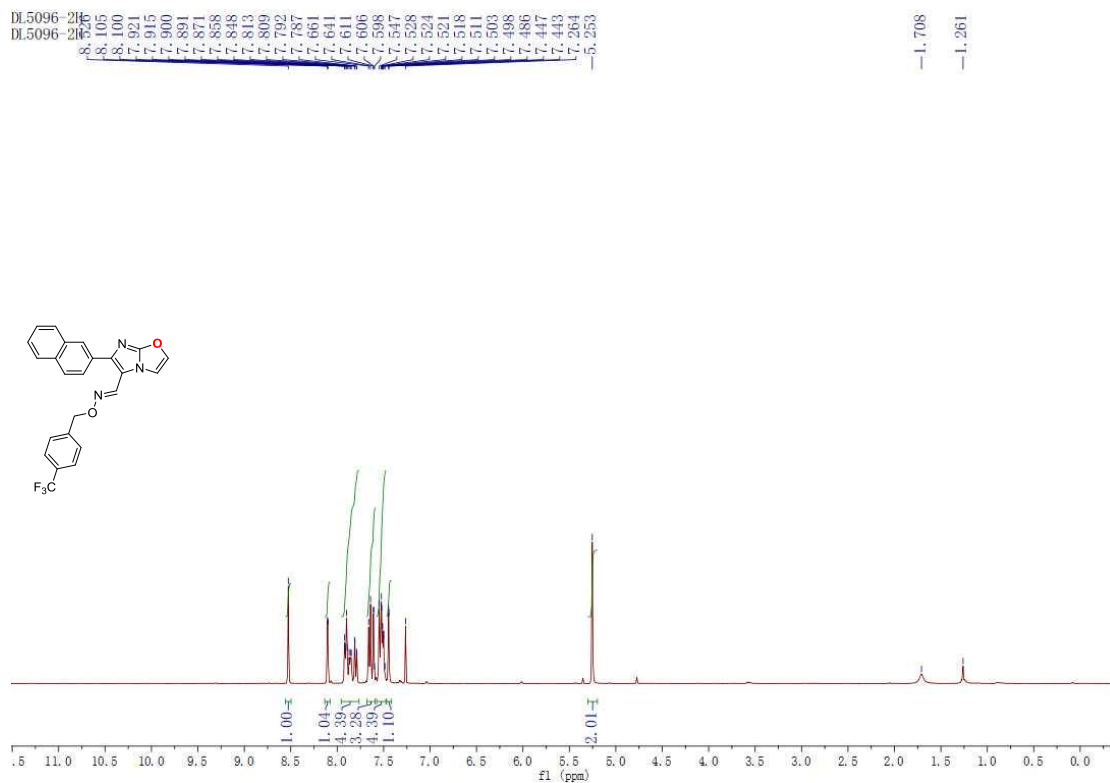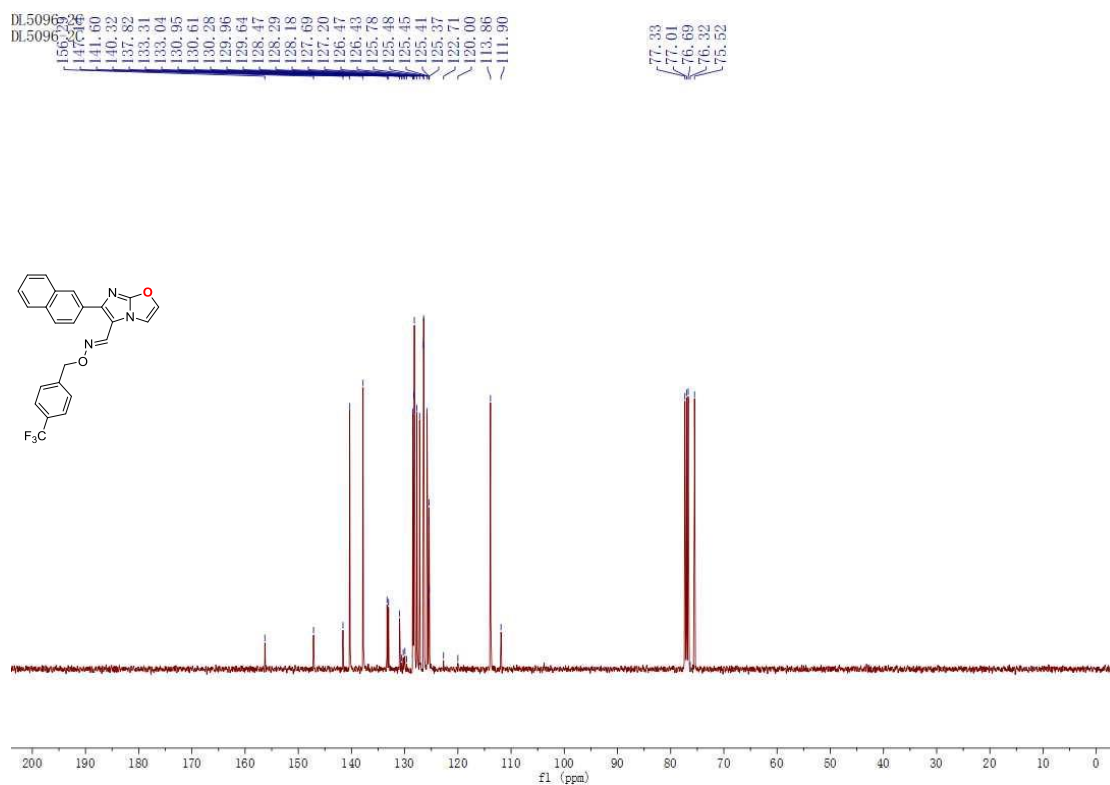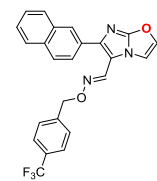

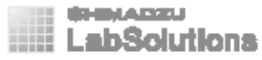

# Analysis Report

## <Sample Information>

|                  |                        |              |                        |
|------------------|------------------------|--------------|------------------------|
| Sample Name      | : 5096-2               | Sample Type  | : Unknown              |
| Sample ID        | : 0.8/80               | Acquired by  | : System Administrator |
| Data Filename    | : 7217.lcd             | Processed by | : System Administrator |
| Method Filename  | : DL single run.lcm    |              |                        |
| Batch Filename   | :                      |              |                        |
| Vial #           | : 1-4                  |              |                        |
| Injection Volume | : 10 uL                |              |                        |
| Date Acquired    | : 7/20/2018 2:39:05 PM |              |                        |
| Date Processed   | : 7/20/2018 2:59:14 PM |              |                        |

## <Chromatogram>

mAU

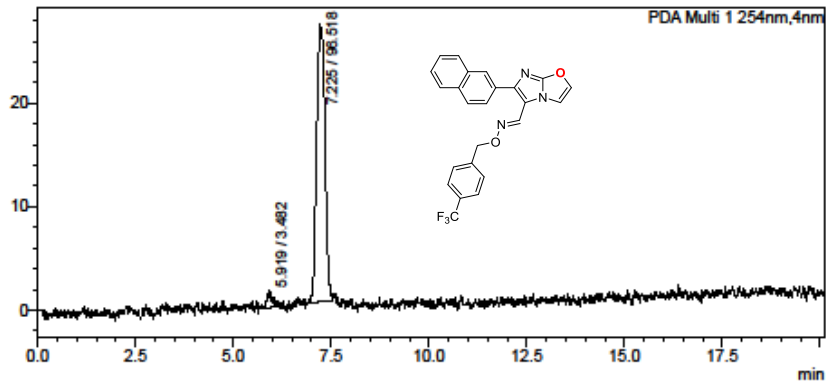

## <Peak Table>

PDA Ch1 254nm

| Peak# | Ret. Time | Area   | Height | Conc. | Unit | Mark | Area%   |
|-------|-----------|--------|--------|-------|------|------|---------|
| 1     | 5.919     | 14209  | 1599   | 0.000 |      | M    | 3.482   |
| 2     | 7.225     | 393901 | 26812  | 0.000 |      | M    | 96.518  |
| Total |           | 408110 | 28411  |       |      |      | 100.000 |

C:\Users\sopl\Desktop\Xue Lab\Liang\7217.lcd

# Compound 27

DL5096-4H  
DL5096-4H

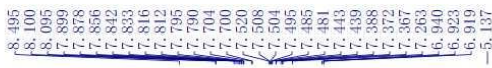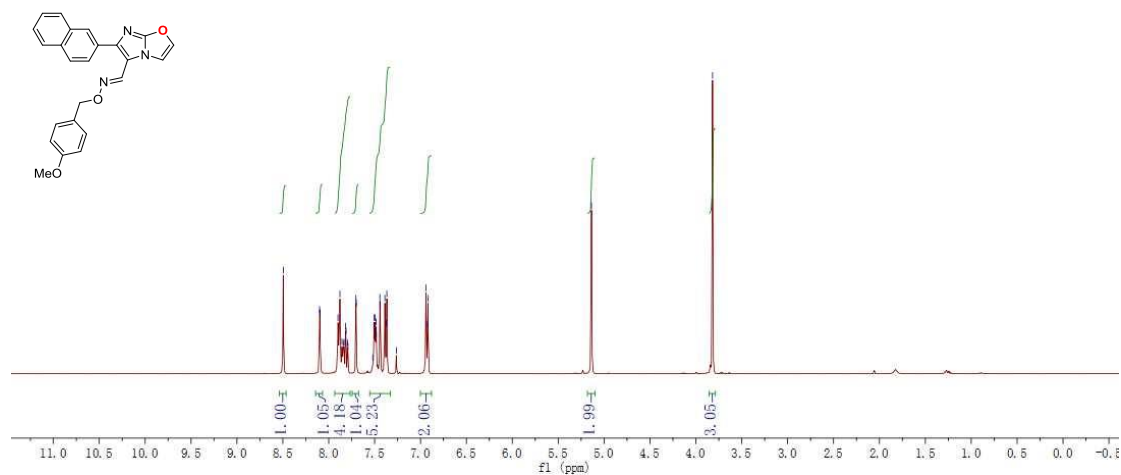

DL5096-4C  
DL5096-4C

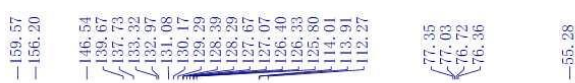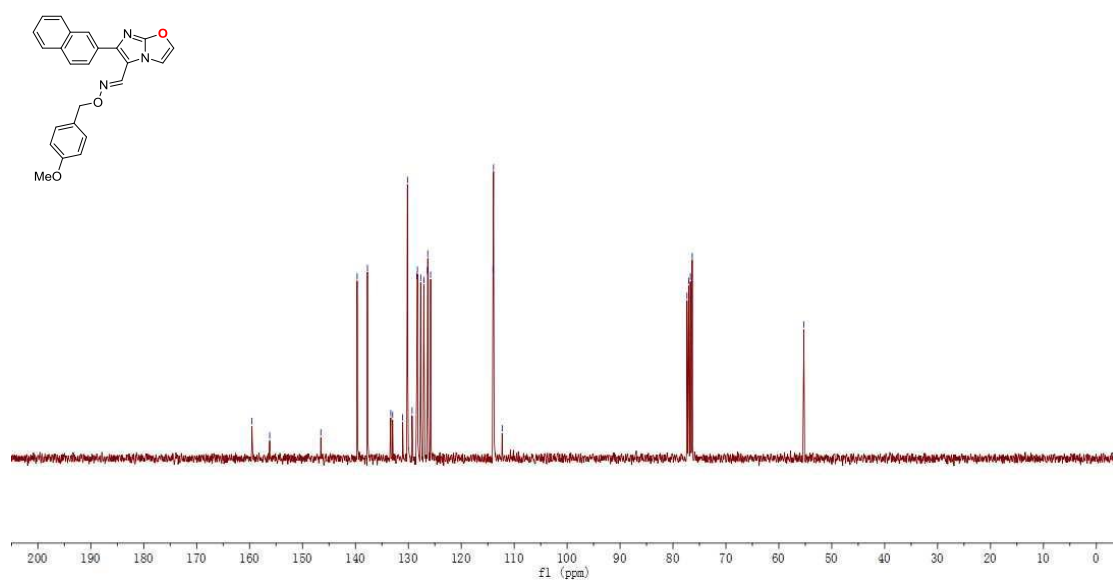

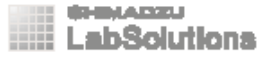

# Analysis Report

## <Sample Information>

Sample Name : 5096-4  
 Sample ID : 0.8/80  
 Data Filename : 7268.lcd  
 Method Filename : DL single run.lcm  
 Batch Filename :  
 Vial # : 1-4  
 Injection Volume : 5 uL  
 Date Acquired : 7/26/2018 11:15:05 AM  
 Date Processed : 7/26/2018 11:29:15 AM

Sample Type : Unknown  
 Acquired by : System Administrator  
 Processed by : System Administrator

## <Chromatogram>

mAU

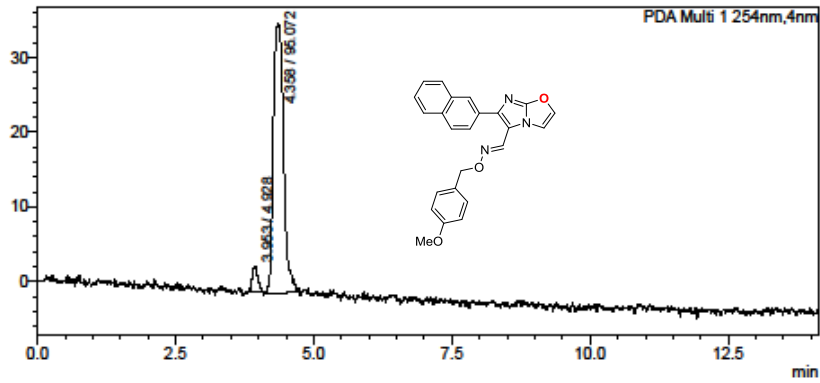

## <Peak Table>

PDA Ch1 254nm

| Peak# | Ret. Time | Area   | Height | Conc. | Unit | Mark | Area%   |
|-------|-----------|--------|--------|-------|------|------|---------|
| 1     | 3.953     | 24086  | 3402   | 0.000 |      | M    | 4.928   |
| 2     | 4.358     | 464707 | 38073  | 0.000 |      | M    | 95.072  |
| Total |           | 488793 | 39475  |       |      |      | 100.000 |

C:\Users\sopl\Desktop\Xue Lab\Liang\7268.lcd

# Compound 28

DL6085-1RH  
DL6085-1RH

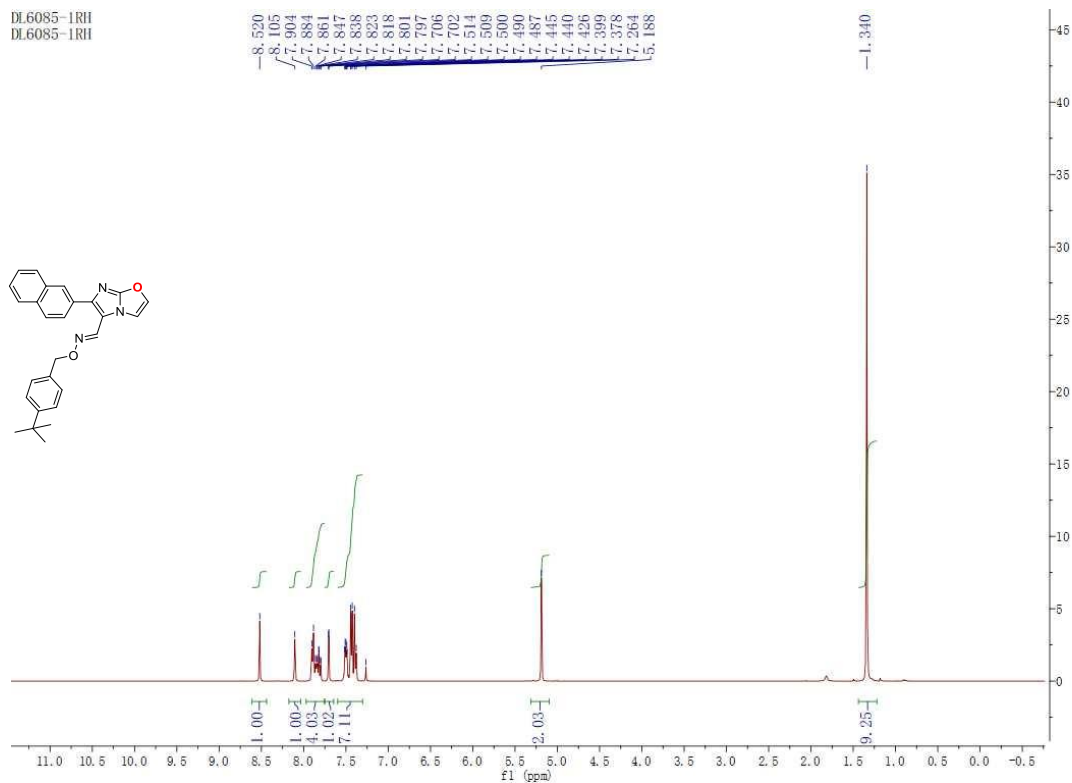

DL6085-1RC  
DL6085-1RC

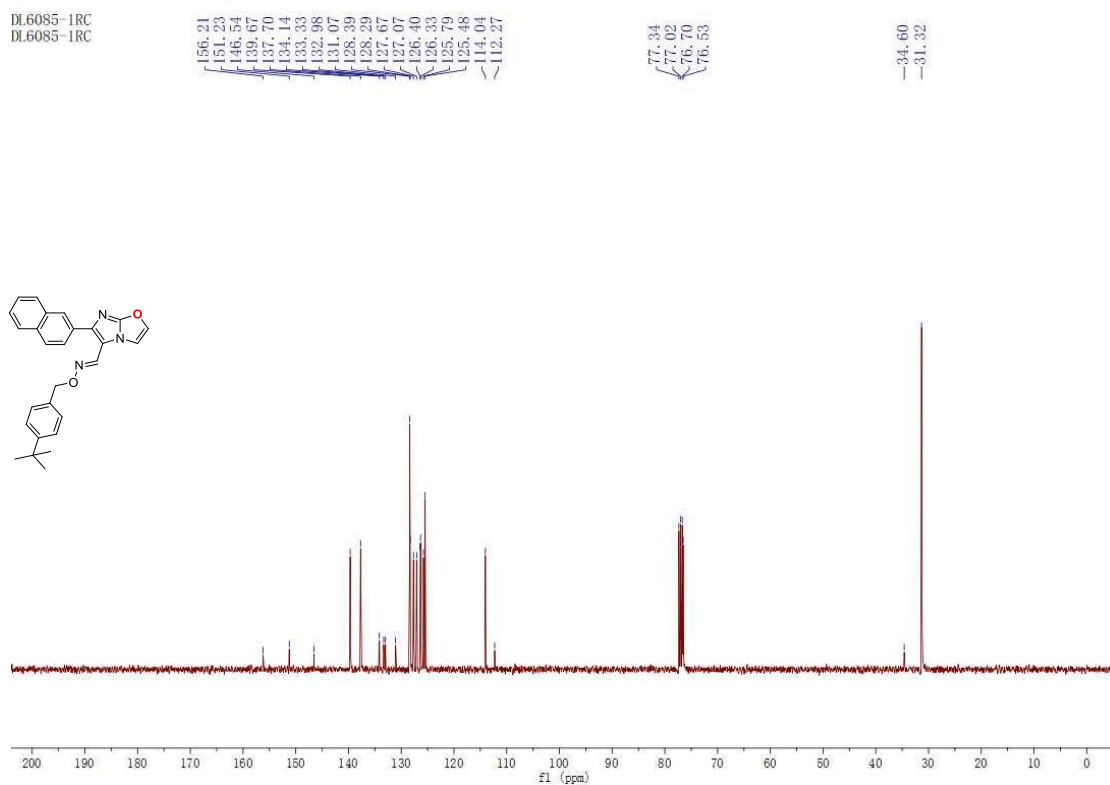

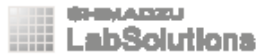

# Analysis Report

## <Sample Information>

Sample Name : 6085-1  
 Sample ID : 0.8/80  
 Data Filename : 7231.lcd  
 Method Filename : DL single run.lcm  
 Batch Filename :  
 Vial # : 1-4  
 Injection Volume : 10 uL  
 Date Acquired : 7/22/2018 4:08:10 PM  
 Date Processed : 7/22/2018 4:28:19 PM

Sample Type : Unknown  
 Acquired by : System Administrator  
 Processed by : System Administrator

## <Chromatogram>

mAU

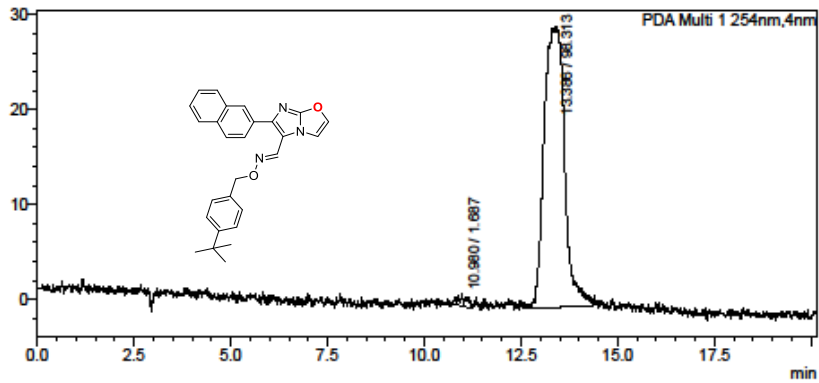

## <Peak Table>

PDA Ch1 254nm

| Peak# | Ret. Time | Area    | Height | Conc. | Unit | Mark | Area%   |
|-------|-----------|---------|--------|-------|------|------|---------|
| 1     | 10.980    | 18572   | 1264   | 0.000 |      | M    | 1.687   |
| 2     | 13.386    | 1082286 | 29564  | 0.000 |      | M    | 98.313  |
| Total |           | 1100858 | 30828  |       |      |      | 100.000 |

C:\Users\sopl\Desktop\Xue Lab\Liang\7231.lcd

# Compound 29

DL6086RRC  
DL6086RRC

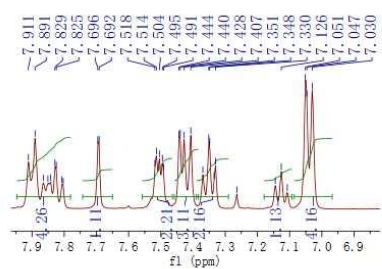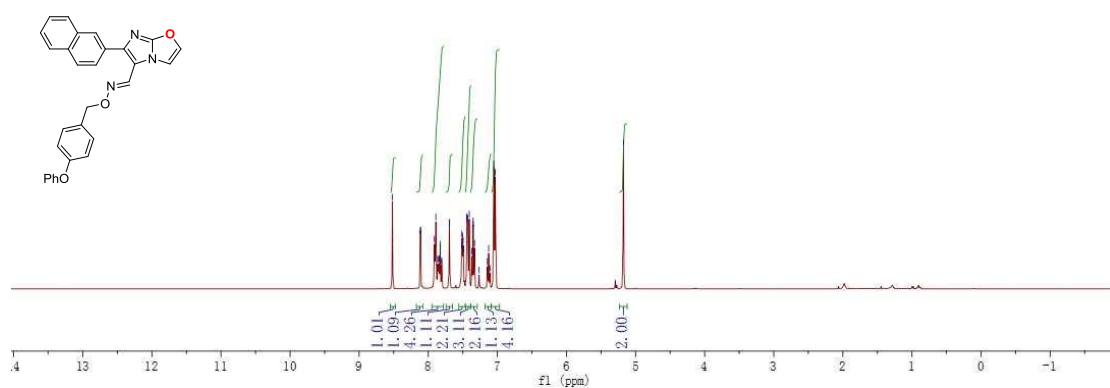

DL6086RRC  
DL6086RRC

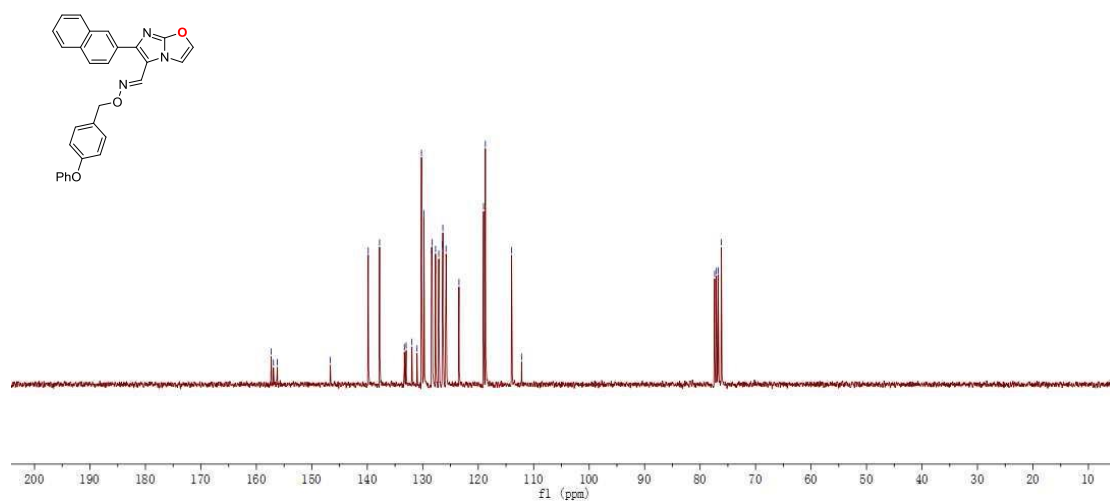

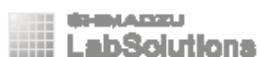

# Analysis Report

## <Sample Information>

Sample Name : 6086  
 Sample ID : 0.8/80  
 Data Filename : 7274.lcd  
 Method Filename : DL single run.lcm  
 Batch Filename :  
 Vial # : 1-4  
 Injection Volume : 5 uL  
 Date Acquired : 7/26/2018 12:26:15 PM  
 Date Processed : 7/26/2018 12:42:36 PM

Sample Type : Unknown  
 Acquired by : System Administrator  
 Processed by : System Administrator

## <Chromatogram>

mAU

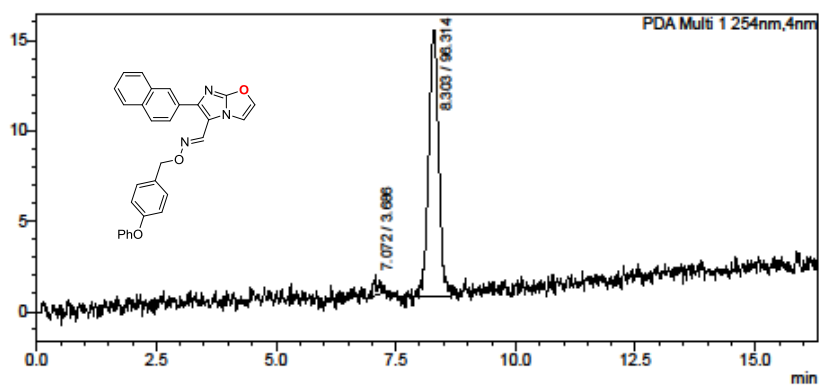

## <Peak Table>

PDA Ch1 254nm

| Peak# | Ret. Time | Area   | Height | Conc. | Unit | Mark | Area%   |
|-------|-----------|--------|--------|-------|------|------|---------|
| 1     | 7.072     | 8338   | 1188   | 0.000 |      | M    | 3.686   |
| 2     | 8.303     | 217859 | 14650  | 0.000 |      | M    | 96.314  |
| Total |           | 226198 | 15837  |       |      |      | 100.000 |

C:\Users\sop\Desktop\Xue Lab\Liang\7274.lcd



## 12. References

- (1) Baig, M. F.; Nayak, V. L.; Budaganaboyina, P.; Mullagiri, K.; Sunkari, S.; Gour, J.; Kamal, A. *Bioorg. Chem.* **2018**, *77*, 515-526.
- (2) Andreani, A.; Granaiola, M.; Leoni, A.; Locatelli, A.; Morigi, R.; Rambaldi, M.; Lenaz, G.; Fato, R.; Bergamini, C.; Farruggia, G. *J. Med. Chem.* **2005**, *48*, 3085-3089.
- (3) Mekonnen, B.; Crank, G.; Craig, D. *J. Heterocyclic Chem.* **1997**, *34*, 589-599.
- (4) Lynch, C.; Zhao, J.; Huang, R.; Xiao, J.; Li, L.; Heyward, S.; Xia, M.; Wang, H. *Sci. Rep.* **2015**, *5*, 10405.
- (5) Faucette, S. R.; Zhang, T. C.; Moore, R.; Sueyoshi, T.; Omiecinski, C. J.; LeCluyse, E. L.; Negishi, M.; Wang, H. *J. Pharmacol. Exp. Ther.* **2007**, *320*, 72-80.
- (6) Mackowiak, B.; Li, L.; Welch, M. A.; Li, D.; Jones, J. W.; Heyward, S.; Kane, M. A.; Swaan, P. W.; Wang, H. *Mol. Pharmacol.* **2017**, *92*, 75-87.
